# Supplementary material for: A genetic variant of fatty acid amide hydrolase (FAAH) exacerbates hormone-mediated orexigenic feeding in mice
Source: eLife. 2023 Apr 11;12:e81919. doi: 10.7554/eLife.81919 (PMC10159625; doi:10.7554/eLife.81919)
Supplement: Figure 1—source data 1. [file elife-81919-fig1-data1.xlsx]

## Sheet: Fig 1A
ID	Genotype	BW_g
1473	WT	32.26
1483	WT	30.43
1509	WT	35.87
1526	WT	27.6
1475	WT	31.41
1495	WT	26.92
1534	WT	30.13
1471	WT	31.12
1540	WT	28.39
1553	WT	29.52
1538	WT	27.66
1544	WT	29.77
1302	WT	29.99
1309	WT	31.15
1324	WT	30.33
1338	WT	26.24
1306	WT	25
1313	WT	32.02
1341	WT	27.03
1349	WT	25.45
1476	HOM	27.44
1490	HOM	28.73
1496	HOM	24.09
1527	HOM	30.73
1474	HOM	26.79
1482	HOM	32.71
1491	HOM	27.93
1541	HOM	29.42
1552	HOM	33.85
1556	HOM	30.49
1546	HOM	36.03
1554	HOM	26.7
1276	HOM	29.52
1286	HOM	30.44
1299	HOM	26.38
1337	HOM	27.7
1279	HOM	30.27
1291	HOM	29.28
1321	HOM	30.21
1340	HOM	28.22
1557	HOM	28.12

## Sheet: Fig 1B
ID	Genotype	Fat_g
1473	WT	8.08567
1483	WT	6.987
1509	WT	8.47567
1526	WT	6.24417
1471	WT	7.6253
1540	WT	7.9018
1553	WT	7.5313
1302	WT	7.01933
1309	WT	6.54967
1324	WT	8.405
1338	WT	4.21733
1475	WT	8.90217
1495	WT	5.74367
1534	WT	6.19167
1538	WT	6.1218
1544	WT	8.3023
1306	WT	5.90433
1313	WT	8.39083
1341	WT	4.34533
1349	WT	4.06
1476	HOM	5.34667
1490	HOM	6.48117
1496	HOM	3.47167
1527	HOM	6.08633
1552	HOM	10.9898
1556	HOM	8.2798
1276	HOM	6.03433
1286	HOM	8.27033
1299	HOM	4.24133
1337	HOM	4.59983
1474	HOM	5.71867
1482	HOM	6.86217
1491	HOM	5.13217
1541	HOM	6.03217
1546	HOM	11.6848
1554	HOM	6.8778
1557	HOM	6.5623
1279	HOM	6.26467
1291	HOM	6.70133
1321	HOM	7.39483
1340	HOM	4.74283

## Sheet: Fig 1C
ID	Genotype	Lean_g
1473	WT	18.5295
1483	WT	19.9757
1509	WT	21.3358
1526	WT	18.9132
1475	WT	21.7338
1495	WT	18.4693
1534	WT	18.2808
1471	WT	18.2728
1540	WT	18.3643
1553	WT	18.3338
1538	WT	15.9738
1544	WT	19.5562
1302	WT	16.7808
1309	WT	20.4355
1324	WT	18.1468
1338	WT	18.5493
1306	WT	15.0098
1313	WT	18.0263
1341	WT	19.7068
1349	WT	16.2597
1476	HOM	17.5357
1490	HOM	18.1198
1496	HOM	16.0917
1527	HOM	21.4827
1474	HOM	19.9338
1482	HOM	19.2558
1491	HOM	18.5183
1541	HOM	15.0808
1552	HOM	15.9533
1556	HOM	19.1543
1546	HOM	15.0102
1554	HOM	20.0402
1276	HOM	18.2307
1286	HOM	20.8618
1299	HOM	21.5582
1337	HOM	17.8683
1279	HOM	18.3948
1291	HOM	16.6417
1321	HOM	18.8648
1340	HOM	16.3468
1557	HOM	20.0458

## Sheet: Fig 1D
ID	Genotype#	Treatment*	BW_Baseline_12_15weeks	Average_Fat_g	Average_Fluid_g	Average_Lean_g	FI_1	FI_2	FI_3	FI_4	FI_5	FI_6	FI_7	FI_8	FI_9	FI_10	FI_11	FI_12	FI_13	FI_14	FI_15	FI_16	FI_17	FI_18	FI_19	FI_20	FI_21	FI_22	FI_23	FI_24	FI_25	FI_26	FI_27	FI_28	FI_29	FI_30	FI_31	FI_32	FI_33	FI_34	FI_35	FI_36	FI_37	FI_38	FI_39	FI_40	FI_41	FI_42	FI_43
1509	1	0	35.87	8.47567	0.754333	21.3358	0.15	0.18	0.22	0.23	0.25	0.33	0.42	0.54	0.86	0.86	1.08	1.12	1.41	1.49	1.51	1.63	1.71	1.85	1.87	2.05	2.11	2.11	2.13	2.13	2.13	2.15	2.22	2.22	2.4	2.42	2.47	2.47	2.54	2.56	2.69	3.1	3.29	3.76	3.89	4.11	4.13	4.21	4.21
1526	1	0	27.6	6.24417	0.607333	18.9132	-0.19	-0.16	-0.06	0.21	0.3	0.5	0.58	0.58	0.8	0.9	1.2	1.27	1.48	1.48	1.5	1.5	1.71	1.71	1.76	1.78	1.94	1.94	1.96	1.96	2.09	2.05	2.07	2.09	2.26	2.47	2.77	2.76	2.76	2.78	2.78	2.96	2.98	2.98	2.98	3.2	3.4	3.4	3.42
1495	1	0	26.92	5.74367	0.539833	16.7808	0	0	0	0.09	0.17	0.25	0.37	0.46	0.55	0.69	0.85	0.85	0.85	0.87	1.03	1.07	1.07	1.19	1.49	1.51	1.76	1.88	2.04	2.06	2.06	2.08	2.08	2.08	2.17	2.35	2.41	2.64	2.71	2.85	2.85	2.87	2.88	2.92	3.02	3.27	3.43	3.53	3.53
1534	1	0	30.13	6.19167	1.11233	20.4355	0.02	0.05	0.05	0.07	0.21	0.22	0.36	0.51	0.61	0.63	0.81	0.96	0.97	1.02	1.2	1.5	1.56	1.86	2.19	2.21	2.21	2.23	2.23	2.23	2.23	2.48	2.71	2.71	2.71	2.73	2.73	2.73	2.75	2.92	2.92	2.92	2.94	3.06	3.24	3.36	3.53	3.53	3.53
1471	1	0	31.12	7.6253	1.41433	21.7338	0	0	0.16	0.17	0.21	0.34	0.36	0.44	0.44	0.58	0.73	0.74	0.78	0.88	0.98	1	1	1.14	1.14	1.14	1.31	1.41	1.41	1.41	1.62	1.62	1.71	1.8	1.82	1.82	1.82	1.82	2.08	2.08	2.08	2.08	2.21	2.25	2.44	2.48	2.48	2.53	2.62
1540	1	0	28.39	7.9018	1.48383	18.4693	0	0	0	0	0	0.12	0.12	0.12	0.2	0.28	0.36	0.62	0.7	0.94	1.05	1.15	1.24	1.29	1.31	1.36	1.36	1.36	1.36	1.36	1.36	1.49	1.65	1.76	1.86	1.95	1.93	1.94	1.93	1.93	1.99	1.99	2.12	2.22	2.39	2.48	2.58	2.58	2.67
1553	1	0	29.52	7.5313	1.55467	18.2808	0.29	0.3	0.3	0.34	0.36	0.51	0.6	0.85	0.96	0.96	1.14	1.44	1.57	1.57	1.59	1.59	2.05	2.2	2.34	2.36	2.36	2.38	2.63	3.01	3.07	3.24	3.35	3.49	3.52	3.52	3.52	3.56	3.56	3.56	3.73	3.91	4.01	4.01	4.03	4.11	4.29	4.45	4.46
1538	1	0	27.66	6.1218	1.15733	18.1468	0	0	0	0.05	0.11	0.25	0.29	0.37	0.46	0.63	0.72	0.8	0.98	0.98	1.02	1.08	1.16	1.3	1.36	1.36	1.36	1.38	1.48	1.64	1.7	1.7	1.7	1.78	1.78	1.8	1.8	1.95	1.95	1.97	2.27	2.27	2.27	2.33	2.6	2.71	2.71	2.71	2.71
1544	1	0	29.77	8.3023	1.71833	18.5493	0.03	0.03	0.03	0.16	0.16	0.33	0.45	0.45	0.51	0.51	0.68	0.68	0.85	0.85	0.98	0.98	1.17	1.17	1.21	1.36	1.48	1.61	1.71	1.71	1.71	1.87	1.87	1.96	2.03	2.03	2.03	2.13	2.24	2.24	2.32	2.38	2.38	2.52	2.52	2.54	2.54	2.54	2.6
1302	1	0	29.99	7.01933	1.30933	18.2728	0	0.08	0.07	0.22	0.3	0.32	0.45	0.52	0.64	0.64	0.78	0.78	0.78	0.9	0.9	1.08	1.16	1.29	1.44	1.43	1.43	1.43	1.55	1.69	1.75	1.86	1.86	1.86	1.86	2.07	2.16	2.16	2.16	2.24	2.24	2.26	2.26	2.42	2.42	2.42	2.7	2.91	3.1
1309	1	0	31.15	6.54967	1.297	18.3643	0	0.02	0.15	0.26	0.26	0.34	0.49	0.7	0.76	0.88	1.01	1.01	1.01	1.09	1.27	1.36	1.38	1.54	1.68	1.76	1.96	2.15	2.43	2.51	2.57	2.65	2.78	2.78	2.88	2.94	2.98	3	3	3	3	3.1	3.23	3.32	3.32	3.45	3.41	3.54	3.55
1324	1	0	30.33	8.405	2.13633	18.3338	0	0	0.06	0.29	0.2	0.28	0.37	0.46	0.66	0.69	0.84	0.94	0.94	1.07	1.23	1.24	1.31	1.28	1.3	1.44	1.53	1.62	1.67	1.76	1.76	1.76	1.85	1.91	1.91	2	2.09	2.09	2.25	2.35	2.39	2.47	2.58	2.76	2.77	2.79	2.79	2.9	2.9
1338	1	0	26.24	4.21733	1.30183	15.9738	0	0.04	0.13	0.22	0.33	0.4	0.46	0.56	0.65	0.76	0.83	0.9	0.97	1	1.03	1.16	1.25	1.25	1.34	1.42	1.51	1.51	1.51	1.55	1.76	1.8	1.91	1.97	1.97	1.97	2.05	2.18	2.32	2.38	2.38	2.42	2.46	2.55	2.57	2.57	2.57	2.57	2.66
1306	1	0	25	5.90433	1.41683	15.0098	0.15	0.16	0.16	0.34	0.4	0.43	0.46	0.52	0.7	0.87	1.03	1.01	1.01	1.2	1.2	1.29	1.44	1.43	1.43	1.56	1.66	1.66	1.66	1.87	1.94	2.06	2.12	2.16	2.22	2.22	2.22	2.22	2.28	2.28	2.46	2.44	2.56	2.6	2.73	2.79	2.84	2.86	2.86
1313	1	0	32.02	8.39083	1.31333	18.0263	0	0.04	0.17	0.24	0.32	0.44	0.45	0.62	0.75	0.84	0.96	1.16	1.16	1.16	1.27	1.27	1.4	1.46	1.54	1.64	1.66	1.73	1.69	1.77	1.77	1.91	1.9	1.9	2	2	2	2.17	2.17	2.17	2.29	2.52	2.66	2.71	2.71	2.71	2.81	2.77	2.92
1341	1	0	27.03	4.34533	0.588333	19.7068	0	0	0.16	0.16	0.19	0.13	0.37	0.33	0.52	0.49	0.58	0.67	0.72	0.83	0.84	0.91	1.13	1.21	1.19	1.25	1.25	1.35	1.35	1.33	1.35	1.37	1.37	1.52	1.65	1.65	1.65	1.65	1.8	1.8	1.91	2.02	2.02	2.01	2.01	2.01	2.08	2.08	2.08
1349	1	0	25.45	4.06	0.544667	16.2597	0.06	0.04	0.24	0.32	0.16	0.3	0.39	0.48	0.59	0.67	0.77	0.72	1.05	0.84	1.05	1.06	1.25	1.31	1.33	1.33	1.37	1.37	1.37	1.34	1.53	1.61	1.63	1.69	1.7	1.91	1.93	1.97	1.94	2.31	2.27	2.36	2.46	2.43	2.57	2.47	2.44	2.38	2.42
1496	2	0	24.09	3.47167	0.424667	16.0917	0	0	0	-0.04	0.15	0.14	0.3	0.42	0.53	0.61	0.58	0.81	0.89	1.03	1.07	1.06	1.14	1.28	1.39	1.52	1.52	1.52	1.52	1.52	1.54	1.67	1.77	1.77	1.77	1.95	2.13	2.19	2.19	2.19	2.19	2.35	2.38	2.38	2.56	2.65	2.65	2.65	2.67
1527	2	0	30.73	6.08633	1.026	21.4827	0	0	0	0.18	0.18	0.33	0.5	0.57	0.71	0.71	0.82	0.91	0.91	0.91	1.17	1.32	1.44	1.61	1.68	1.68	1.69	1.69	1.69	2.02	2.02	2.02	2.04	2.04	2.24	2.3	2.3	2.59	2.64	2.71	2.71	2.71	2.71	2.95	2.99	3.14	3.14	3.14	3.14
1491	2	0	27.93	5.13217	0.574333	18.2307	0	0	0.15	0.19	0.25	0.62	0.74	0.84	1.02	1.04	1.25	1.27	1.33	1.35	1.57	1.75	1.94	2.09	2.26	2.34	2.34	2.36	2.36	2.36	2.38	2.47	2.47	2.62	2.89	2.97	2.97	2.97	3.05	3.17	3.38	3.52	3.64	3.64	3.64	3.66	3.86	4.64	4.73
1541	2	0	29.42	6.03217	0.718667	20.8618	0	0	0	0.17	0.27	0.33	0.47	0.54	0.73	0.86	0.91	1.05	1.24	1.24	1.42	1.63	1.92	2	2	2	2	2.14	2.44	2.52	2.52	2.54	2.54	2.54	2.56	2.62	2.69	2.69	2.82	2.82	2.97	3.04	3.2	3.39	3.48	3.64	3.73	3.73	3.73
1552	2	0	33.85	10.9898	1.39683	19.9338	0	0	0	0	0.09	0.17	0.32	0.38	0.49	0.63	0.63	0.77	0.77	0.77	0.77	0.88	1.03	1.03	1.03	1.05	1.23	1.48	1.48	1.48	1.48	1.48	1.48	1.61	1.82	1.92	1.92	1.92	1.92	1.92	2.14	2.24	2.27	2.27	2.27	2.27	2.27	2.27	2.42
1556	2	0	30.49	8.2798	1.54733	19.2558	0	0	0	0	0	0.07	0.08	0.21	0.33	0.33	0.47	0.52	0.56	0.66	0.74	0.91	0.9	0.9	0.9	0.91	1.09	1.09	1.09	1.34	1.56	1.58	1.58	1.58	1.58	1.79	1.79	1.79	1.79	1.96	2.09	2.18	2.25	2.36	2.36	2.36	2.36	2.5	2.52
1546	2	0	36.03	11.6848	1.55267	21.5582	-0.09	0.11	0.03	0.09	0.27	0.35	0.5	0.63	0.67	0.67	0.76	0.77	0.77	0.89	0.94	0.94	0.94	0.94	0.94	1.07	1.26	1.31	1.32	1.32	1.51	1.51	1.53	1.53	1.53	1.65	1.75	1.75	1.77	1.85	1.93	1.93	1.93	1.93	2.15	2.15	2.15	2.21	2.27
1554	2	0	26.7	6.8778	1.07083	17.8683	0.03	0.03	0.03	0.03	0.03	0.03	0.22	0.22	0.23	0.23	0.42	0.42	0.71	0.77	0.9	0.9	0.9	0.9	0.93	1.03	1.03	1.08	1.31	1.36	1.36	1.36	1.36	1.53	1.73	1.8	1.94	1.94	1.94	1.94	1.94	2.05	2.05	2.05	2.07	2.23	2.29	2.29	2.29
1276	2	0	29.52	6.03433	0.952833	18.5183	0.08	0.08	0.09	0.09	0.09	0.09	0.18	0.2	0.23	0.58	0.72	0.89	0.89	0.89	0.89	0.91	0.91	0.91	1.13	1.33	1.45	1.52	1.52	1.52	1.52	1.52	1.78	2.05	2.1	2.1	2.1	2.1	2.1	2.23	2.45	2.51	2.51	2.51	2.51	2.53	2.57	2.67	2.67
1286	2	0	30.44	8.27033	1.10383	15.0808	0	0	0	0.16	0.14	0.19	0.3	0.29	0.39	0.46	0.45	0.7	0.85	0.84	0.84	0.84	0.93	0.98	1.01	1.15	1.22	1.22	1.22	1.2	1.2	1.2	1.36	1.36	1.36	1.46	1.56	1.65	1.65	1.65	1.68	1.8	1.99	2.07	2.11	2.19	2.31	2.44	2.44
1299	2	0	26.38	4.24133	0.924333	15.9533	0	0.07	0.06	0.09	0.26	0.29	0.38	0.47	0.61	0.69	0.8	0.8	0.92	0.92	0.92	1.03	1.1	1.1	1.1	1.1	1.29	1.49	1.49	1.49	1.49	1.69	1.69	1.69	1.69	1.81	1.82	1.82	1.97	1.97	1.97	2.06	2.06	2.18	2.3	2.4	2.4	2.4	2.4
1337	2	0	27.7	4.59983	0.652833	19.1543	0.03	0.03	0.11	0.11	0.31	0.4	0.59	0.67	0.71	0.85	0.85	1.04	1.1	1.17	1.19	1.19	1.19	1.34	1.34	1.39	1.43	1.64	1.82	1.82	1.84	1.86	2.02	2.17	2.17	2.19	2.19	2.19	2.26	2.29	2.46	2.56	2.75	2.81	2.92	2.92	2.94	2.94	2.94
1279	2	0	30.27	6.26467	0.969333	16.6417	0	0	0.08	0.13	0.26	0.32	0.44	0.49	0.59	0.63	0.7	0.79	0.85	0.82	0.94	0.96	0.96	0.96	1.06	1.14	1.16	1.16	1.16	1.16	1.16	1.29	1.39	1.39	1.5	1.59	1.59	1.59	1.59	1.64	1.71	1.92	2	2.08	2.16	2.18	2.22	2.43	2.69
1291	2	0	29.28	6.70133	0.962833	18.8648	0	-0.15	-0.03	0.1	0.62	0.84	0.92	0.98	1.02	0.87	1.2	1.26	1.38	1.38	1.24	1.55	1.54	1.63	1.67	1.77	1.94	2.07	2.19	2.21	2.21	2.21	2.21	2.21	2.26	2.52	2.63	2.63	2.63	2.63	2.65	2.76	2.89	2.89	2.89	2.89	3.11	3.17	3.19
1321	2	0	30.21	7.39483	1.67833	16.3468	0	0	0.2	0.19	0.37	0.54	0.78	0.92	1.05	1.17	1.28	1.33	1.4	1.55	1.75	1.82	1.82	1.82	1.86	2.04	2.25	2.41	2.41	2.41	2.43	2.43	2.43	2.43	2.52	2.57	2.57	2.67	2.67	2.94	3.06	3.24	3.38	3.59	3.61	3.83	3.89	3.91	3.91
1340	2	0	28.22	4.74283	0.743333	20.0458	0	0	0	0	0.26	0.26	0.45	0.53	0.66	0.77	0.77	1.01	1.04	1.12	1.15	1.23	1.23	1.23	1.21	1.49	1.54	1.61	1.68	1.68	1.68	1.68	1.68	1.9	1.96	2.01	2.01	2.01	2.19	2.19	2.21	2.25	2.31	2.31	2.39	2.39	2.56	2.63	2.73
1557	2	0	28.12	6.5623	1.33983	18.3948	0	0	0.14	0.14	0.3	0.3	0.48	0.48	0.58	0.7	0.7	0.83	0.83	0.91	0.91	0.91	0.91	0.94	0.94	1.09	1.26	1.34	1.31	1.32	1.32	1.32	1.44	1.56	1.56	1.56	1.56	1.64	1.64	1.64	1.84	2	2	2	2	2.09	2.11	2.09	2.09
#Genotype: 1 = WT; 2 = HOM
*Treatment: 0 = no treatment (baseline)
[truncated: 34 more columns]

## Sheet: Fig 1E
ID	Genotype#	Treatment*	BW_Baseline_12_15weeks	Average_Fat_g	Average_Fluid_g	Average_Lean_g	RER_1	RER_2	RER_3	RER_4	RER_5	RER_6	RER_7	RER_8	RER_9	RER_10	RER_11	RER_12	RER_13	RER_14	RER_15	RER_16	RER_17	RER_18	RER_19	RER_20	RER_21	RER_22	RER_23	RER_24	RER_25	RER_26	RER_27	RER_28	RER_29	RER_30	RER_31	RER_32	RER_33	RER_34	RER_35	RER_36	RER_37	RER_38	RER_39	RER_40	RER_41	RER_42	RER_43
1509	1	0	35.87	8.47567	0.754333	21.3358	0.778032	0.759265	0.805163	0.800376	0.754987	0.77955	0.881238	0.801727	0.870831	0.931726	0.888779	0.839999	0.857107	0.882146	0.819662	0.812229	0.868964	0.906806	0.883497	0.895184	0.890548	0.838255	0.812746	0.797889	0.803023	0.813163	0.847453	0.789011	0.867764	0.86489	0.884112	0.829686	0.895139	0.826385	0.854423	0.887508	0.886881	0.910351	0.912501	0.918304	0.921204	0.935194	0.88185
1526	1	0	27.6	6.24417	0.607333	18.9132	0.783187	0.686796	0.839253	0.838233	0.817861	0.824905	0.839924	0.844644	0.892359	0.88287	0.905198	0.862836	0.904781	0.921327	0.810476	0.769758	0.885809	0.919993	0.894992	0.88828	0.913859	0.885875	0.90685	0.910113	0.883678	0.945991	0.873748	0.938884	0.902886	0.912163	0.92839	0.912248	0.858354	0.848014	0.852452	0.931588	0.898421	0.890585	0.926101	0.896951	0.916134	0.932715	0.895373
1495	1	0	26.92	5.74367	0.539833	16.7808	0.775991	0.738825	0.838783	0.785226	0.874662	0.864236	0.818949	0.90796	0.919917	0.905885	0.983787	0.866351	0.861897	0.847106	0.910035	0.87127	0.869966	0.936443	0.932189	0.908333	0.931029	0.940152	0.941171	0.913656	0.870883	0.922803	0.875172	0.874275	0.894095	0.942161	0.949226	0.91464	0.942371	0.899441	0.890527	0.922084	0.876688	0.938059	0.901988	0.919199	0.927925	0.961443	0.914909
1534	1	0	30.13	6.19167	1.11233	20.4355	0.77108	0.737311	0.722124	0.689953	0.749312	0.814885	0.857055	0.875246	0.911667	0.879831	0.946054	0.930883	0.9271	0.989059	0.927862	0.938126	0.91455	0.941509	0.923802	0.884601	0.889726	0.862121	0.861246	0.900711	0.85578	0.965663	0.932464	0.893548	0.885259	0.877017	0.879165	0.843721	0.933098	0.852869	0.875317	0.926031	0.879823	0.913046	0.941719	0.908377	0.937607	0.966662	0.898476
1471	1	0	31.12	7.6253	1.41433	21.7338	0.848937	0.902176	0.897668	0.975031	0.999076	0.934702	0.937171	0.921639	0.941189	0.92486	0.906278	0.961828	0.895266	0.886239	0.934979	0.921527	0.86254	0.947132	0.97252	0.971129	0.960667	0.982247	0.925038	0.947704	1.0053	0.928775	0.905334	0.949697	0.994376	0.88291	0.919807	0.893271	0.874678	0.9837	0.928923	0.981624	0.979702	0.972178	0.986006	0.967961	0.927906	0.937177	0.930116
1540	1	0	28.39	7.9018	1.48383	18.4693	0.758837	0.783396	0.742999	0.837463	0.777635	0.853319	0.865117	0.879147	0.837321	0.860911	0.880003	0.896779	0.901502	0.903016	0.907641	0.920024	0.906772	0.942211	0.933535	0.943263	0.885387	0.909784	0.926388	0.893006	0.909738	0.926538	0.921789	0.946109	0.936482	0.918461	0.916318	0.890971	0.938575	0.896882	0.914443	0.935971	0.869638	0.936683	0.939469	0.927765	0.896694	0.926755	0.864877
1553	1	0	29.52	7.5313	1.55467	18.2808	0.828087	0.75345	0.753948	0.815738	0.775452	0.800427	0.861634	0.906804	0.922679	0.894922	0.910899	0.903133	0.90902	0.907796	0.913673	0.931401	0.913423	0.935348	0.908084	0.921745	0.896706	0.932393	0.932983	0.928392	0.934213	0.928368	0.926176	0.916532	0.939039	0.867133	0.901138	0.894297	0.891961	0.920926	0.899525	0.946847	0.895537	0.920845	0.878012	0.900759	0.936204	0.914322	0.892199
1538	1	0	27.66	6.1218	1.15733	18.1468	0.692837	0.777186	0.730129	0.80282	0.840298	0.879404	0.917617	0.893877	0.915816	0.923695	0.89057	0.894246	0.899189	0.907427	0.913197	0.902833	0.878675	0.921314	0.880233	0.87736	0.771212	0.78653	0.862788	0.935341	0.923385	0.857939	0.863332	0.862633	0.924713	0.877492	0.843775	0.916821	0.880932	0.896908	0.912276	0.985989	0.908264	0.951354	0.911627	0.905583	0.856973	0.89324	0.92448
1544	1	0	29.77	8.3023	1.71833	18.5493	0.798517	0.741445	0.758583	0.787339	0.81087	0.856693	0.917021	0.873888	0.90288	0.839457	0.907216	0.872196	0.898161	0.878425	0.904457	0.897272	0.91321	0.905008	0.905719	0.931012	0.933806	0.930443	0.937637	0.939913	0.892096	0.900395	0.856529	0.926383	0.947599	0.890789	0.86988	0.895566	0.906013	0.873664	0.874087	0.943589	0.873052	0.909317	0.931698	0.854357	0.812832	0.835458	0.857229
1302	1	0	29.99	7.01933	1.30933	18.2728	0.871347	0.79698	0.854612	0.880302	0.931841	0.920034	0.928413	0.895233	0.921626	0.90154	0.912164	0.923886	0.928013	0.916177	0.909058	0.922447	0.884619	0.942365	0.929743	0.92076	0.906571	0.919936	0.925165	0.908343	0.922802	0.913905	0.910241	0.921955	0.866487	0.91316	0.924259	0.911369	0.887672	0.856444	0.876594	0.870708	0.860994	0.892109	0.875707	0.838501	0.887664	0.91481	0.897414
1309	1	0	31.15	6.54967	1.297	18.3643	0.989782	0.985472	0.964378	0.993929	0.993804	0.951842	0.976564	0.970354	0.97485	0.964889	0.97452	0.970917	0.982806	0.992825	0.982778	0.988975	0.960942	0.998712	0.976775	0.993307	0.981436	0.993918	0.987351	0.960302	0.971194	0.955838	0.955931	0.942617	0.913217	0.940214	0.932278	0.930117	0.868823	0.821539	0.826712	0.873798	0.941296	0.932493	0.92125	0.848889	0.932412	0.891598	0.877817
1324	1	0	30.33	8.405	2.13633	18.3338	0.818509	0.824285	0.817243	0.894135	0.888171	0.876445	0.900182	0.900016	0.937339	0.937909	0.913384	0.932387	0.950457	0.933023	0.940822	0.938252	0.905758	0.918135	0.905242	0.949073	0.931719	0.961362	0.933039	0.925058	0.937707	0.951191	0.920126	0.933797	0.973697	0.936197	0.974229	0.957896	0.941014	0.946596	0.943525	0.922895	0.903853	0.94812	0.917095	0.899508	0.894584	0.969689	0.889992
1338	1	0	26.24	4.21733	1.30183	15.9738	0.774099	0.74741	0.822833	0.847752	0.857406	0.893009	0.898757	0.890876	0.900774	0.913577	0.910876	0.91012	0.95675	0.910503	0.922078	0.93377	0.914871	0.906522	0.920359	0.949476	0.934642	0.930773	0.840043	0.908048	0.944378	0.930301	0.917684	0.922573	0.872879	0.865501	0.933451	0.931774	0.913896	0.939036	0.931448	0.897535	0.908361	0.912265	0.866508	0.853014	0.763112	0.791182	0.804812
1306	1	0	25	5.90433	1.41683	15.0098	0.87662	0.874621	0.874047	0.88796	0.912044	0.909349	0.917586	0.930114	0.907049	0.929981	0.914746	0.921917	0.90889	0.911911	0.900898	0.921854	0.896818	0.919805	0.950157	0.949904	0.956893	0.936457	0.920416	0.945992	0.950957	0.936863	0.921415	0.948139	0.909378	0.896078	0.884572	0.867652	0.960612	0.894142	0.960294	0.884738	0.95212	0.919364	0.925821	0.879043	0.928535	0.896637	0.857467
1313	1	0	32.02	8.39083	1.31333	18.0263	0.874489	0.842311	0.9436	0.95192	0.968867	0.9577	0.963841	0.945487	1.00481	0.989933	0.957424	0.986592	0.993258	0.979678	0.997078	1.02434	0.997582	1.00032	0.991896	1.006	0.991052	0.990707	0.986963	0.972476	1.00702	0.993707	0.975321	0.979832	0.955385	0.972916	1.05012	1.00657	0.995819	1.00096	1.00624	0.95969	0.980822	1.01312	0.983427	1.01748	1.01288	0.950815	1.00115
1341	1	0	27.03	4.34533	0.588333	19.7068	0.778178	0.790462	0.829998	0.862373	0.891527	0.882922	0.92731	0.920744	0.953817	0.926381	0.920138	0.93653	0.946975	0.937725	0.926029	0.914944	0.932773	0.938859	0.955325	0.923875	0.932615	0.956917	0.916161	0.940674	0.904559	0.88393	0.831596	0.900181	0.920191	0.921335	0.934695	0.935614	0.91027	0.961491	0.937259	0.930533	0.918727	0.908322	0.862924	0.864508	0.897413	0.877439	0.822175
1349	1	0	25.45	4.06	0.544667	16.2597	0.829123	0.811527	0.842767	0.872379	0.882839	0.887339	0.894321	0.895195	0.92167	0.908867	0.917789	0.924764	0.954601	0.93758	0.910303	0.963566	0.944707	0.932784	0.924022	0.943491	0.909836	0.934243	0.889008	0.919773	0.922822	0.925029	0.905171	0.913514	0.922176	0.915594	0.937959	0.962079	0.941168	0.93247	0.925422	0.921345	0.914149	0.929629	0.90739	0.893859	0.917735	0.902462	0.904304
1496	2	0	24.09	3.47167	0.424667	16.0917	0.694475	0.66684	0.781776	0.814601	0.840128	0.806515	0.901037	0.89378	0.910976	0.953545	0.956068	0.942557	0.926736	0.959427	0.864268	0.866329	0.944553	0.95675	0.95456	0.904725	0.948483	0.876344	0.859205	0.852938	0.800042	0.974316	0.92499	0.879983	0.910092	0.930771	0.961699	0.905609	0.867516	0.860523	0.861416	0.939999	0.895896	0.903136	0.901682	0.934553	0.912459	0.963168	0.90293
1527	2	0	30.73	6.08633	1.026	21.4827	0.770227	0.732274	0.790698	0.822973	0.864065	0.85742	0.889133	0.912564	0.902688	0.892101	0.977838	0.912629	0.935786	0.977319	0.942647	0.923557	0.914525	0.952758	0.919119	0.926552	0.85003	0.850028	0.894753	0.945669	0.868981	0.93484	0.903899	0.870835	0.932287	0.924254	0.924652	0.925467	0.934525	0.885387	0.872473	0.868923	0.84508	0.924119	0.926161	0.919354	0.907495	0.917817	0.894695
1491	2	0	27.93	5.13217	0.574333	18.2307	0.843371	0.873704	0.869823	0.917118	0.856693	0.890479	0.89199	0.927349	0.928816	0.940706	0.990944	0.9514	0.912377	0.978009	0.983561	0.948504	0.937448	1.04491	0.927474	0.940959	0.933224	0.929896	0.881549	0.857765	0.886088	0.971731	0.872585	0.918857	0.948601	0.956247	0.94226	0.857234	0.942981	0.925539	0.934395	0.956192	0.906009	0.850879	0.876519	0.900937	0.90938	0.991145	0.938571
1541	2	0	29.42	6.03217	0.718667	20.8618	0.780709	0.732372	0.752273	0.840749	0.926376	0.855582	0.890888	0.896546	0.933245	0.945941	0.975376	0.910179	0.981244	0.99473	0.959659	0.967832	0.953526	0.960904	0.88615	0.950913	0.96319	0.934901	0.953707	0.934947	0.892441	0.998731	0.846928	0.909331	0.88832	0.947208	0.934969	0.956705	0.951486	0.919246	0.92349	0.962664	0.954834	0.932619	0.928074	0.931113	0.935236	0.935126	0.937324
1552	2	0	33.85	10.9898	1.39683	19.9338	0.744648	0.747046	0.76016	0.739521	0.739253	0.805493	0.836037	0.869131	0.886467	0.884567	0.846445	0.847057	0.853312	0.826041	0.827208	0.895972	0.874826	0.889097	0.881853	0.877654	0.878954	0.87397	0.854941	0.870126	0.895175	0.862082	0.881127	0.856972	0.913607	0.880835	0.827924	0.85911	0.859088	0.887065	0.899397	0.912367	0.874451	0.88743	0.860208	0.835487	0.827945	0.89408	0.860393
1556	2	0	30.49	8.2798	1.54733	19.2558	0.786715	0.754189	0.733275	0.753009	0.743986	0.735539	0.806268	0.830363	0.919718	0.893876	0.883227	0.868361	0.884135	0.882632	0.909153	0.905783	0.901382	0.879331	0.893479	0.913448	0.889876	0.910944	0.920787	0.907388	0.920906	0.890804	0.892601	0.888301	0.916618	0.906427	0.954808	0.913174	0.902865	0.929923	0.920259	0.933304	0.905673	0.905424	0.923911	0.888465	0.919146	0.921481	0.88706
1546	2	0	36.03	11.6848	1.55267	21.5582	0.758699	0.749052	0.757789	0.799604	0.774856	0.874279	0.911183	0.914563	0.914137	0.911405	0.880584	0.889761	0.883886	0.870013	0.896527	0.856672	0.817224	0.850799	0.834329	0.903308	0.923224	0.868008	0.845678	0.899054	0.92067	0.893117	0.836179	0.875551	0.858273	0.856613	0.92675	0.855878	0.867816	0.916515	0.907967	0.925528	0.857311	0.921084	0.902746	0.919779	0.899623	0.919675	0.901292
1554	2	0	26.7	6.8778	1.07083	17.8683	0.859888	0.769702	0.745845	0.756283	0.724599	0.736282	0.800578	0.883625	0.944661	0.874245	0.910038	0.854028	0.931588	0.915842	0.942469	0.917766	0.888588	0.924857	0.940887	0.9605	0.87171	0.968251	0.950574	0.965925	0.991601	0.904462	0.898246	0.958613	0.970615	0.920946	0.93985	0.905728	0.871863	0.912547	0.95505	0.981085	0.898201	0.909413	0.957873	0.917239	0.923612	0.921396	0.873353
1276	2	0	29.52	6.03433	0.952833	18.5183	0.803595	0.828385	0.738676	0.78321	0.779617	0.733691	0.798969	0.833027	0.844827	0.886037	0.893142	0.877453	0.879337	0.906207	0.920504	0.910398	0.912829	0.900254	0.88746	0.937554	0.921007	0.892711	0.926713	0.936191	0.942899	0.883564	0.913022	0.916071	0.954341	0.932496	0.940087	0.902448	0.898504	0.94424	0.917186	0.953727	0.896566	0.908191	0.925163	0.910419	0.914933	0.931133	0.896269
1286	2	0	30.44	8.27033	1.10383	15.0808	0.81932	0.735669	0.757847	0.756729	0.890928	0.891435	0.901376	0.880399	0.915578	0.907402	0.916621	0.935702	0.943791	0.932885	0.918754	0.931168	0.925812	0.92877	0.916302	0.914984	0.920994	0.933524	0.91512	0.865118	0.852064	0.808697	0.854648	0.909223	0.863669	0.896628	0.92255	0.908266	0.926613	0.903127	0.898146	0.909793	0.923361	0.933292	0.934941	0.887988	0.94184	0.929117	0.923956
1299	2	0	26.38	4.24133	0.924333	15.9533	0.884786	0.846183	0.90831	0.92642	0.910984	0.98073	0.996972	0.971508	0.98315	0.973225	0.990165	1.01081	0.974132	0.987639	0.978775	1.00509	0.932317	0.986956	0.968889	0.997855	1.01301	0.998478	0.981109	0.903248	0.981993	1.00369	0.993789	1.0073	0.9827	0.980385	0.95621	0.96276	0.982869	0.997631	1.00735	0.953554	1.02247	0.997253	0.972053	0.940426	0.974705	1.01652	0.973999
1337	2	0	27.7	4.59983	0.652833	19.1543	0.835911	0.791901	0.85303	0.820717	0.862647	0.903992	0.90833	0.898262	0.928703	0.911698	0.886304	0.939177	0.941882	0.93794	0.947744	0.922997	0.863644	0.904344	0.894189	0.92691	0.946064	0.930481	0.908925	0.909383	0.935008	0.933776	0.917151	0.921354	0.914789	0.921238	0.913105	0.900602	0.8821	0.923465	0.929997	0.907377	0.944696	0.931677	0.924731	0.891424	0.914176	0.922596	0.919295
1279	2	0	30.27	6.26467	0.969333	16.6417	0.766806	0.765053	0.772926	0.785498	0.885932	0.852624	0.881909	0.878168	0.907432	0.901841	0.900585	0.914214	0.90708	0.885911	0.894657	0.876058	0.83336	0.814253	0.868447	0.941729	0.898929	0.897219	0.800191	0.807492	0.845271	0.86242	0.893848	0.890592	0.86152	0.870658	0.868956	0.878713	0.84521	0.867505	0.903012	0.887402	0.945124	0.931258	0.886539	0.852116	0.873202	0.906984	0.921105
1291	2	0	29.28	6.70133	0.962833	18.8648	0.76772	0.726569	0.752945	0.739994	0.79111	0.771022	0.82951	0.812909	0.840242	0.796248	0.877542	0.890091	0.864938	0.87622	0.903638	0.901705	0.859093	0.835012	0.83444	0.850445	0.835182	0.908853	0.894997	0.899237	0.863504	0.855442	0.80263	0.792723	0.824465	0.901624	0.875064	0.935968	0.809958	0.790858	0.805105	0.848659	0.879333	0.86842	0.840715	0.844699	0.890536	0.894245	0.884096
1321	2	0	30.21	7.39483	1.67833	16.3468	0.873997	0.776091	0.854403	0.914206	0.928571	0.938812	0.967757	0.962839	0.975902	0.982414	0.972405	0.991399	0.975835	0.969957	0.993152	1.00902	0.976195	0.986106	0.988419	0.979146	1.00109	0.991747	0.988829	0.972332	0.991296	0.957715	0.952554	0.925978	0.946765	1.00115	1.01645	0.939343	0.935986	0.977949	0.962232	0.964419	0.968554	0.948585	0.957954	0.950408	0.973441	0.948374	0.92548
1340	2	0	28.22	4.74283	0.743333	20.0458	0.881253	0.830253	0.767031	0.847371	0.882252	0.893007	0.942204	0.916	0.951053	0.924905	0.941116	0.956472	0.948178	0.944417	0.962263	0.934785	0.92375	0.910506	0.937914	0.956871	0.953671	0.967794	0.939875	0.927113	0.936208	0.928875	0.938953	0.956093	0.952639	0.930943	0.931267	0.943319	0.921175	0.937054	0.943472	0.930791	0.930542	0.905571	0.922087	0.978977	0.932468	0.916968	0.928409
1557	2	0	28.12	6.5623	1.33983	18.3948	0.740547	0.719888	0.782207	0.829815	0.84528	0.825859	0.865429	0.865553	0.892928	0.87419	0.877526	0.854667	0.871068	0.846068	0.853228	0.854466	0.827855	0.861352	0.840951	0.888831	0.903269	0.903093	0.835956	0.861105	0.822319	0.861213	0.881903	0.883877	0.880886	0.878733	0.89513	0.913453	0.877843	0.87432	0.878303	0.878331	0.857465	0.921255	0.881363	0.860757	0.920141	0.89596	0.906913
#Genotype: 1 = WT; 2 = HOM
*Treatment: 0 = no treatment (baseline)
[truncated: 39 more columns]

## Sheet: Fig 1F
ID	Genotype#	Treatment*	BW_Baseline	Average_Fat_g	Average_Fluid_g	Average_Lean_g	TEE_1	TEE_2	TEE_3	TEE_4	TEE_5	TEE_6	TEE_7	TEE_8	TEE_9	TEE_10	TEE_11	TEE_12	TEE_13	TEE_14	TEE_15	TEE_16	TEE_17	TEE_18	TEE_19	TEE_20	TEE_21	TEE_22	TEE_23	TEE_24	TEE_25	TEE_26	TEE_27	TEE_28	TEE_29	TEE_30	TEE_31	TEE_32	TEE_33	TEE_34	TEE_35	TEE_36	TEE_37	TEE_38	TEE_39	TEE_40	TEE_41	TEE_42	TEE_43
1509	1	0	35.87	8.47567	0.754333	21.3358	0.527726	0.373289	0.419543	0.519188	0.40663	0.548556	0.554378	0.627713	0.549484	0.398847	0.708542	0.65984	0.660928	0.496296	0.36819	0.530475	0.646843	0.616508	0.608304	0.650943	0.54794	0.374391	0.357424	0.353031	0.387548	0.348034	0.429779	0.34351	0.528186	0.388106	0.531808	0.348701	0.353992	0.395525	0.603514	0.678288	0.643645	0.693822	0.616892	0.624177	0.524134	0.483487	0.409103
1526	1	0	27.6	6.24417	0.607333	18.9132	0.41655	0.317548	0.481575	0.570452	0.598738	0.576309	0.590004	0.558824	0.571448	0.584457	0.585504	0.565752	0.501185	0.422114	0.265671	0.342455	0.505297	0.548135	0.440137	0.320512	0.452192	0.299432	0.282899	0.273823	0.316741	0.262084	0.330965	0.417152	0.60412	0.590816	0.596292	0.419781	0.311201	0.326191	0.286173	0.4287	0.3276	0.314623	0.543963	0.544641	0.52057	0.373564	0.231705
1495	1	0	26.92	5.74367	0.539833	16.7808	0.337325	0.32038	0.452399	0.337587	0.506878	0.391379	0.44311	0.513859	0.488262	0.417749	0.443315	0.316064	0.318354	0.293114	0.487699	0.310893	0.28091	0.518441	0.502067	0.53467	0.49654	0.472647	0.492575	0.46052	0.27083	0.267101	0.314621	0.276806	0.513876	0.526549	0.490088	0.501318	0.485815	0.434071	0.277467	0.27555	0.318384	0.502602	0.54284	0.509173	0.514968	0.405296	0.381431
1534	1	0	30.13	6.19167	1.11233	20.4355	0.388646	0.364116	0.342182	0.346667	0.496695	0.430364	0.392089	0.378864	0.500801	0.328559	0.344401	0.492782	0.378468	0.39661	0.589844	0.568698	0.534156	0.565293	0.491645	0.44337	0.318426	0.330768	0.399777	0.296676	0.352001	0.517194	0.539484	0.444992	0.350691	0.32429	0.329045	0.334413	0.456467	0.345561	0.351389	0.369462	0.355496	0.54014	0.515355	0.530988	0.49498	0.406061	0.265493
1471	1	0	31.12	7.6253	1.41433	21.7338	0.343103	0.415535	0.494156	0.375202	0.497234	0.533395	0.550699	0.552181	0.512676	0.54652	0.520297	0.491583	0.34389	0.530041	0.49369	0.276554	0.361196	0.306524	0.309385	0.419554	0.444864	0.500256	0.31435	0.346151	0.343466	0.332027	0.539096	0.560325	0.492274	0.281818	0.346547	0.349422	0.477355	0.321692	0.379596	0.301608	0.452379	0.502562	0.583597	0.560435	0.56	0.489421	0.517004
1540	1	0	28.39	7.9018	1.48383	18.4693	0.326008	0.317153	0.336806	0.366319	0.389644	0.462293	0.32417	0.434716	0.430878	0.546677	0.607744	0.570946	0.547854	0.583662	0.498974	0.580133	0.535577	0.51894	0.436901	0.520012	0.306677	0.302259	0.318553	0.351206	0.328151	0.470441	0.621713	0.559541	0.541436	0.550004	0.320497	0.400935	0.436399	0.398937	0.445738	0.433627	0.520771	0.575322	0.561538	0.548334	0.574819	0.531302	0.511997
1553	1	0	29.52	7.5313	1.55467	18.2808	0.496122	0.348181	0.372891	0.505314	0.478446	0.505231	0.468707	0.567887	0.52243	0.387126	0.560642	0.640417	0.52639	0.358185	0.359535	0.497317	0.615765	0.572721	0.414357	0.289427	0.339567	0.48749	0.624212	0.575673	0.566737	0.614806	0.586254	0.559927	0.476788	0.294206	0.385499	0.437643	0.355538	0.370378	0.593812	0.56687	0.497524	0.325213	0.411797	0.589265	0.60822	0.482458	0.300947
1538	1	0	27.66	6.1218	1.15733	18.1468	0.293226	0.314308	0.282582	0.439363	0.396626	0.427917	0.439475	0.598437	0.594817	0.617536	0.580895	0.580337	0.575363	0.557531	0.556608	0.544844	0.559052	0.50606	0.499738	0.344857	0.414665	0.355242	0.584846	0.518477	0.547819	0.334702	0.388816	0.294048	0.279914	0.340664	0.431494	0.338462	0.346888	0.350182	0.542645	0.288992	0.361263	0.627123	0.571763	0.463832	0.288777	0.280564	0.309302
1544	1	0	29.77	8.3023	1.71833	18.5493	0.576028	0.500325	0.548388	0.503789	0.481494	0.530334	0.571324	0.494995	0.538068	0.483251	0.572353	0.569692	0.601078	0.605409	0.591115	0.466168	0.475158	0.524971	0.492114	0.481208	0.602072	0.599951	0.585358	0.432716	0.509872	0.520438	0.592601	0.603806	0.512139	0.487656	0.539146	0.538473	0.485941	0.448878	0.557633	0.375623	0.454885	0.539185	0.461206	0.513893	0.440474	0.336295	0.481289
1302	1	0	29.99	7.01933	1.30933	18.2728	0.570045	0.622196	0.446382	0.552486	0.595025	0.759384	0.733623	0.634579	0.616025	0.457155	0.610283	0.433047	0.589336	0.489618	0.535743	0.67254	0.556064	0.735268	0.728988	0.612972	0.481612	0.480795	0.69374	0.734926	0.669405	0.597603	0.507981	0.556078	0.496139	0.748742	0.658533	0.499431	0.566479	0.527153	0.478199	0.508321	0.419743	0.567643	0.473613	0.516492	0.737106	0.766861	0.708425
1309	1	0	31.15	6.54967	1.297	18.3643	0.298789	0.400736	0.478471	0.552133	0.413246	0.579408	0.60685	0.587644	0.568162	0.601518	0.599815	0.480376	0.305032	0.522106	0.495356	0.579237	0.636296	0.62206	0.639959	0.633391	0.648339	0.655306	0.670473	0.625006	0.592415	0.582323	0.560422	0.562632	0.532848	0.540453	0.533781	0.532291	0.301174	0.366321	0.326574	0.555667	0.55208	0.532345	0.334301	0.488039	0.530282	0.529521	0.482171
1324	1	0	30.33	8.405	2.13633	18.3338	0.290848	0.50641	0.56459	0.555973	0.62397	0.651927	0.605064	0.649111	0.615978	0.596921	0.597868	0.599206	0.624741	0.646992	0.602561	0.582924	0.580747	0.493887	0.443756	0.456171	0.498534	0.610854	0.601217	0.438239	0.42775	0.46916	0.455748	0.500683	0.587686	0.450218	0.415226	0.556169	0.39397	0.470116	0.622174	0.66614	0.645493	0.562724	0.563657	0.48171	0.462838	0.380266	0.465397
1338	1	0	26.24	4.21733	1.30183	15.9738	0.546801	0.516601	0.533555	0.545644	0.495992	0.510345	0.479714	0.601951	0.575302	0.586374	0.581081	0.462628	0.627472	0.490953	0.641288	0.630357	0.578451	0.460095	0.609172	0.647337	0.618231	0.508598	0.554368	0.63431	0.677687	0.626885	0.459735	0.55658	0.557219	0.49464	0.586564	0.566768	0.631958	0.605263	0.574498	0.586666	0.558348	0.555512	0.525454	0.526111	0.465169	0.428049	0.572142
1306	1	0	25	5.90433	1.41683	15.0098	0.518416	0.579702	0.333243	0.504238	0.621892	0.657625	0.618271	0.651084	0.675623	0.621405	0.628012	0.603203	0.555837	0.596932	0.528301	0.46725	0.474392	0.374669	0.52041	0.6091	0.5644	0.356764	0.370714	0.659218	0.644089	0.683763	0.653366	0.626003	0.596817	0.45598	0.41146	0.440078	0.53783	0.39713	0.530395	0.436826	0.605623	0.626	0.67106	0.670141	0.685118	0.564082	0.381859
1313	1	0	32.02	8.39083	1.31333	18.0263	0.42413	0.333064	0.547904	0.462219	0.469936	0.521282	0.345505	0.377416	0.519514	0.496967	0.412894	0.459095	0.309272	0.289897	0.376276	0.369421	0.510187	0.567393	0.580679	0.549236	0.525529	0.496704	0.502857	0.373606	0.313816	0.486382	0.450314	0.311366	0.430789	0.382153	0.29995	0.461054	0.308907	0.304277	0.467816	0.559941	0.431854	0.434421	0.341238	0.310938	0.390169	0.347819	0.530914
1341	1	0	27.03	4.34533	0.588333	19.7068	0.378785	0.31099	0.497873	0.333911	0.487542	0.506601	0.520429	0.54069	0.529706	0.529171	0.520345	0.518895	0.526443	0.511452	0.497831	0.497883	0.504574	0.480424	0.480349	0.383931	0.277738	0.414641	0.511052	0.494961	0.344874	0.299723	0.276533	0.428756	0.458867	0.330447	0.319534	0.32656	0.315782	0.476507	0.505212	0.498263	0.418206	0.391599	0.299826	0.502995	0.47908	0.384439	0.340672
1349	1	0	25.45	4.06	0.544667	16.2597	0.549728	0.444384	0.564751	0.577199	0.652645	0.596535	0.524579	0.614973	0.594498	0.467131	0.599144	0.5703	0.585605	0.591698	0.60366	0.596996	0.589563	0.622263	0.572685	0.3955	0.421381	0.387182	0.312363	0.526733	0.615581	0.597499	0.527539	0.357395	0.357607	0.555647	0.447337	0.529289	0.638447	0.613529	0.627947	0.61192	0.563035	0.512281	0.450806	0.493129	0.331024	0.378887	0.305363
1496	2	0	24.09	3.47167	0.424667	16.0917	0.273609	0.263445	0.342473	0.393781	0.381791	0.282875	0.465789	0.463864	0.470794	0.436167	0.447478	0.441825	0.413791	0.379159	0.312273	0.295819	0.388007	0.46355	0.436451	0.460774	0.405384	0.293091	0.304358	0.27442	0.262336	0.420105	0.368214	0.251027	0.390412	0.523946	0.456982	0.430579	0.283947	0.30014	0.289696	0.439315	0.291733	0.295391	0.455997	0.447608	0.250719	0.247957	0.328019
1527	2	0	30.73	6.08633	1.026	21.4827	0.401814	0.364132	0.465682	0.523591	0.47457	0.572504	0.559511	0.552783	0.401193	0.304008	0.437751	0.408288	0.335408	0.472621	0.577704	0.576243	0.571941	0.545197	0.555393	0.294198	0.333296	0.33522	0.504178	0.54166	0.327312	0.307862	0.425151	0.352237	0.536734	0.468488	0.524216	0.55279	0.522619	0.499194	0.283437	0.31812	0.33216	0.561921	0.503958	0.501237	0.274761	0.283981	0.282002
1491	2	0	27.93	5.13217	0.574333	18.2307	0.286537	0.379858	0.433966	0.406645	0.304531	0.524844	0.473865	0.477353	0.374368	0.280946	0.366042	0.379294	0.30787	0.277257	0.512226	0.505044	0.520266	0.474068	0.510388	0.465857	0.271627	0.255478	0.279123	0.31264	0.309345	0.343026	0.315498	0.450501	0.477149	0.45722	0.257899	0.33613	0.335845	0.455285	0.528849	0.455545	0.476113	0.249188	0.252431	0.404886	0.506939	0.515111	0.422609
1541	2	0	29.42	6.03217	0.718667	20.8618	0.317604	0.304557	0.28617	0.353478	0.481741	0.336636	0.477707	0.340895	0.463217	0.505735	0.330594	0.328075	0.368636	0.435926	0.574927	0.555351	0.568587	0.441462	0.31998	0.33614	0.42055	0.529924	0.559571	0.482988	0.305586	0.254203	0.32548	0.331766	0.324213	0.464716	0.293865	0.400649	0.442237	0.353681	0.407844	0.500991	0.567158	0.578184	0.534813	0.542469	0.439072	0.252018	0.268266
1552	2	0	33.85	10.9898	1.39683	19.9338	0.331591	0.344769	0.329255	0.421075	0.411485	0.558621	0.447063	0.521256	0.48951	0.596394	0.376401	0.366203	0.296895	0.353689	0.368053	0.553445	0.565198	0.300021	0.307256	0.488963	0.573204	0.543457	0.307493	0.355903	0.321442	0.33005	0.467934	0.604628	0.577878	0.515136	0.283536	0.307695	0.3046	0.44089	0.605081	0.557504	0.329453	0.29768	0.29838	0.308315	0.31465	0.516071	0.572202
1556	2	0	30.49	8.2798	1.54733	19.2558	0.503624	0.369993	0.378296	0.427406	0.418213	0.456778	0.432958	0.572145	0.366725	0.541007	0.63983	0.652748	0.629662	0.577193	0.560716	0.582644	0.329066	0.443914	0.389761	0.501081	0.508746	0.433618	0.580223	0.653818	0.609272	0.434824	0.360843	0.398705	0.444179	0.492427	0.377661	0.517218	0.370685	0.563838	0.639608	0.599172	0.554264	0.394219	0.35886	0.365243	0.617291	0.647306	0.566939
1546	2	0	36.03	11.6848	1.55267	21.5582	0.319078	0.298769	0.309786	0.448137	0.356023	0.39215	0.539921	0.497501	0.474546	0.491647	0.524164	0.297326	0.469893	0.497882	0.457585	0.289001	0.391083	0.327369	0.294999	0.545083	0.556809	0.472016	0.27496	0.376567	0.513941	0.461087	0.298383	0.306688	0.39301	0.497603	0.349984	0.288242	0.370897	0.433174	0.479375	0.270932	0.284873	0.354968	0.530045	0.320202	0.325983	0.458378	0.476316
1554	2	0	26.7	6.8778	1.07083	17.8683	0.429623	0.297763	0.306009	0.299123	0.306253	0.29598	0.4816	0.301976	0.311121	0.515817	0.483211	0.310768	0.488875	0.507979	0.498437	0.408202	0.299542	0.34218	0.363727	0.399778	0.300906	0.436928	0.509373	0.324019	0.421508	0.308249	0.362565	0.536443	0.525373	0.525691	0.461243	0.299864	0.289663	0.410754	0.483625	0.314409	0.377815	0.314412	0.420028	0.544484	0.388447	0.310603	0.312357
1276	2	0	29.52	6.03433	0.952833	18.5183	0.53136	0.377783	0.37847	0.630259	0.447435	0.621219	0.621514	0.46156	0.636529	0.429372	0.426259	0.648013	0.619312	0.427562	0.401896	0.422521	0.735747	0.724584	0.680018	0.628131	0.611198	0.410695	0.413397	0.445994	0.395061	0.421463	0.565926	0.467976	0.484126	0.610081	0.747765	0.584727	0.393968	0.396077	0.682231	0.697105	0.715367	0.692596	0.735745	0.711442	0.658738	0.618611	0.600194
1286	2	0	30.44	8.27033	1.10383	15.0808	0.290341	0.466474	0.342467	0.474967	0.530693	0.299184	0.307764	0.38161	0.44092	0.504614	0.534687	0.423934	0.286094	0.330846	0.34802	0.455749	0.390607	0.276616	0.378258	0.368883	0.533601	0.489038	0.396394	0.273145	0.322578	0.401961	0.339088	0.380382	0.312268	0.361913	0.319262	0.397372	0.368097	0.314046	0.281288	0.429904	0.282562	0.499771	0.501502	0.503498	0.312682	0.285685	0.292594
1299	2	0	26.38	4.24133	0.924333	15.9533	0.46534	0.333143	0.522602	0.403689	0.590712	0.582875	0.588839	0.567796	0.597924	0.531804	0.397959	0.538635	0.56119	0.546028	0.314725	0.506868	0.350967	0.478242	0.397314	0.456011	0.529805	0.592284	0.566535	0.351535	0.338973	0.518142	0.548838	0.555388	0.334667	0.475201	0.334925	0.412851	0.369009	0.475946	0.493572	0.474502	0.55951	0.588653	0.5355	0.499441	0.284096	0.303373	0.300118
1337	2	0	27.7	4.59983	0.652833	19.1543	0.326758	0.543284	0.527403	0.388342	0.562032	0.583888	0.641671	0.624544	0.595711	0.570548	0.5722	0.55825	0.621949	0.560714	0.530167	0.380986	0.347074	0.385974	0.575297	0.54991	0.404108	0.328865	0.399362	0.354467	0.492743	0.580375	0.526753	0.35553	0.488847	0.502163	0.339116	0.300854	0.349729	0.561097	0.585732	0.6198	0.566558	0.562406	0.56351	0.54245	0.537712	0.582218	0.622029
1279	2	0	30.27	6.26467	0.969333	16.6417	0.567056	0.642314	0.512438	0.472578	0.725754	0.724419	0.568472	0.557892	0.537088	0.560266	0.501869	0.68045	0.555002	0.507039	0.772683	0.79034	0.746671	0.754886	0.740716	0.679735	0.689121	0.708201	0.715688	0.625114	0.416769	0.59685	0.408184	0.390971	0.572228	0.710662	0.705563	0.591521	0.405156	0.466482	0.613429	0.650134	0.414559	0.400408	0.451253	0.653299	0.690643	0.570919	0.558322
1291	2	0	29.28	6.70133	0.962833	18.8648	0.392242	0.309641	0.50311	0.444083	0.55308	0.571638	0.530164	0.583942	0.562109	0.529181	0.533244	0.506085	0.549185	0.580989	0.561823	0.570462	0.299146	0.32127	0.460894	0.533678	0.534604	0.510302	0.321861	0.423371	0.420099	0.360136	0.360413	0.357	0.485668	0.333444	0.416435	0.43034	0.4737	0.580593	0.569188	0.607754	0.607339	0.554637	0.547665	0.565504	0.547405	0.474717	0.42578
1321	2	0	30.21	7.39483	1.67833	16.3468	0.456202	0.283533	0.339859	0.441652	0.482911	0.44285	0.476976	0.378547	0.493488	0.521786	0.365712	0.509044	0.575038	0.522651	0.567109	0.514158	0.445154	0.399958	0.402694	0.537618	0.568704	0.563611	0.539582	0.385171	0.453255	0.391471	0.377971	0.492832	0.543413	0.516631	0.337294	0.366531	0.452441	0.391873	0.46966	0.539054	0.43266	0.338833	0.407768	0.320705	0.472949	0.519072	0.513697
1340	2	0	28.22	4.74283	0.743333	20.0458	0.491703	0.408588	0.515704	0.506906	0.605215	0.347842	0.426515	0.524466	0.683567	0.581837	0.652716	0.573375	0.451149	0.542642	0.440716	0.383196	0.386519	0.491713	0.371973	0.63157	0.569157	0.563457	0.528646	0.440092	0.434051	0.441588	0.593924	0.537251	0.329989	0.367848	0.382244	0.403564	0.445819	0.424385	0.637289	0.523961	0.366934	0.334556	0.365618	0.62111	0.582449	0.305579	0.319165
1557	2	0	28.12	6.5623	1.33983	18.3948	0.427996	0.381441	0.321053	0.319625	0.353494	0.367861	0.546557	0.36351	0.464047	0.558732	0.574917	0.525734	0.312489	0.338575	0.331209	0.341957	0.376288	0.337998	0.630376	0.589208	0.531417	0.349774	0.337683	0.355829	0.336283	0.457116	0.581056	0.611364	0.494533	0.317104	0.351422	0.370277	0.373181	0.615487	0.586313	0.454524	0.363903	0.335935	0.320208	0.620135	0.570547	0.495445	0.433239
#Genotype: 1 = WT; 2 = HOM
*Treatment: 0 = no treatment (baseline)
[truncated: 34 more columns]

## Sheet: Fig 1 Suppl 1
ID	Genotype #	Age (months)	BW_g
1276	2	2	29.51
1279	2	2	31.65
1286	2	2	30.21
1291	2	2	29.14
1299	2	2	26.8
1321	2	2	29.98
1337	2	2	28.33
1340	2	2	29.76
1474	2	2	28.07
1476	2	2	27.77
1482	2	2	32.19
1490	2	2	28.49
1491	2	2	27.25
1496	2	2	24.2
1527	2	2	30.19
1541	2	2	28.8
1546	2	2	35.22
1552	2	2	32.13
1554	2	2	26.83
1556	2	2	29.05
1557	2	2	27.85
1302	1	2	29.23
1306	1	2	27.03
1309	1	2	30.23
1313	1	2	31.45
1324	1	2	29.87
1338	1	2	26.24
1341	1	2	26.72
1349	1	2	25.43
1471	1	2	31.92
1473	1	2	33.1
1475	1	2	30.98
1483	1	2	30.15
1495	1	2	26.53
1509	1	2	37.04
1526	1	2	27.74
1534	1	2	30.86
1538	1	2	26.66
1540	1	2	27.72
1544	1	2	29.73
1553	1	2	28.82
1769	2	3	31.87
1789	2	3	32.48
1795	2	3	34.55
1819	2	3	33.94
1833	2	3	35.4
1849	2	3	27.9
1853	2	3	27.15
1761	1	3	28.52
1791	1	3	27.56
1793	1	3	36.26
1817	1	3	34.05
1829	1	3	32.01
1845	1	3	31.5
3563	2	4	31.6
3567	2	4	34.9
3575	2	4	36.6
3577	2	4	33.7
3579	2	4	34.4
3581	2	4	33.3
3583	2	4	36
3587	2	4	31.9
3595	2	4	34.4
3599	2	4	31.3
3603	2	4	35
3607	2	4	30.6
3617	2	4	35.2
3619	2	4	32.2
3625	2	4	37.2
3637	2	4	30.7
2957	2	4	32.91
3007	2	4	38.75
3029	2	4	38.86
3037	2	4	34.31
3039	2	4	31.04
3057	2	4	33.22
3061	2	4	33.23
3065	2	4	31.4
3083	2	4	33
3097	2	4	31.01
3115	2	4	35.77
3121	2	4	32.09
3125	2	4	36.29
3127	2	4	34.15
3129	2	4	34.24
2961	2	4	29.78
2991	2	4	32.99
2999	2	4	37.05
3009	2	4	31.28
3015	2	4	34.57
3023	2	4	33.37
3027	2	4	35.67
3553	1	4	36.7
3561	1	4	33.2
3573	1	4	31.4
3591	1	4	35
3605	1	4	33.1
3611	1	4	30.3
3613	1	4	35.8
3621	1	4	35.5
3623	1	4	35
3633	1	4	28.4
3635	1	4	29.1
3639	1	4	34.2
3641	1	4	32
3643	1	4	32
3653	1	4	27.6
3655	1	4	28.4
3031	1	4	32.97
3043	1	4	32.57
3045	1	4	31.48
3049	1	4	33.72
3051	1	4	35.08
3067	1	4	33.43
3071	1	4	29.7
3079	1	4	30.5
3085	1	4	32.32
3091	1	4	32.47
3093	1	4	32.44
3103	1	4	38.46
3105	1	4	33.41
3109	1	4	37.33
3113	1	4	33.76
3117	1	4	39.47
2951	1	4	29.81
2959	1	4	32.93
2977	1	4	36.65
2989	1	4	34.27
3001	1	4	34.47
3003	1	4	35.65
3025	1	4	32.55
#Genotype: 1 = WT; 2 = HOM
