# Supplementary material for: A genetic variant of fatty acid amide hydrolase (FAAH) exacerbates hormone-mediated orexigenic feeding in mice
Source: eLife. 2023 Apr 11;12:e81919. doi: 10.7554/eLife.81919 (PMC10159625; doi:10.7554/eLife.81919)
Supplement: Figure 2—source data 1. [file elife-81919-fig2-data1.xlsx]

## Sheet: Fig 2B
ID	Genotype#	Treatment *	Fat_g_Week_4
1302	1	1	6.811
1309	1	1	6.8235
1324	1	1	8.341
1338	1	1	5.1365
1306	1	2	6.5425
1313	1	2	11.7443
1341	1	2	7.61533
1349	1	2	6.8015
1334	1	2	8.224
1276	2	1	7.811
1286	2	1	8.051
1299	2	1	6.08367
1337	2	1	6.589
1342	2	1	6.4
1279	2	2	9.957
1291	2	2	10.439
1321	2	2	8.69
1340	2	2	9.7895
1344	2	2	10.518
#Genotype: 1 = WT; 2 = HOM
*Treatment: 1 = Vehicle; 2 = CORT

## Sheet: Fig 2C
ID	Genotype#	Treatment *	Lean_Week_4
1302	1	1	18.0813
1309	1	1	19.5398
1324	1	1	18.3733
1338	1	1	16.4533
1306	1	2	15.7763
1313	1	2	17.2193
1341	1	2	16.5563
1349	1	2	17.7138
1334	1	2	16.1508
1276	2	1	17.9023
1286	2	1	17.8928
1299	2	1	15.5767
1337	2	1	15.9803
1342	2	1	17.5473
1279	2	2	17.1877
1291	2	2	17.1353
1321	2	2	17.6448
1340	2	2	19.2208
1344	2	2	17.1603
#Genotype: 1 = WT; 2 = HOM
*Treatment: 1 = Vehicle; 2 = CORT

## Sheet: Fig 2D
ID	Genotype#	Treatment *	FI_1	FI_2	FI_3	FI_4	FI_5	FI_6	FI_7	FI_8	FI_9	FI_10	FI_11	FI_12	FI_13	FI_14	FI_15	FI_16	FI_17	FI_18	FI_19	FI_20	FI_21	FI_22	FI_23	FI_24	FI_25	FI_26	FI_27	FI_28	FI_29	FI_30	FI_31	FI_32	FI_33	FI_34	FI_35	FI_36	FI_37	FI_38	FI_39	FI_40	FI_41	FI_42	FI_43	FI_44	FI_45	FI_46	FI_47
1302	1	1	0	0.17	0.22	0.24	0.21	0.1	0.37	0.6	0.77	0.77	0.78	0.91	1.13	1.32	1.47	1.49	1.51	1.53	1.53	1.66	1.66	1.79	1.79	1.79	1.96	1.96	1.98	2.17	2.28	2.28	2.41	2.41	2.41	2.43	2.54	2.56	2.56	2.67	2.75	2.75	2.75	2.77	2.77	2.79	2.79	2.79	2.81
1309	1	1	0.07	0.19	0.23	0.37	0.47	0.66	0.74	0.92	1.09	1.16	1.29	1.44	1.44	1.46	1.46	1.6	1.76	1.89	2	2.1	2.23	2.35	2.47	2.47	2.49	2.49	2.49	2.51	2.51	2.51	2.68	2.81	2.83	2.83	3.11	3.18	3.28	3.26	3.28	3.28	3.28	3.28	3.3	3.25	3.52	3.64	3.64
1324	1	1	0.05	0.14	0.3	0.34	0.52	0.46	0.69	0.68	0.67	0.89	0.9	0.9	0.95	0.93	1.11	1.16	1.16	1.16	1.18	1.24	1.24	1.29	1.5	1.71	1.68	1.68	1.69	1.71	1.71	1.9	1.96	1.96	2.09	2.16	2.24	2.24	2.3	2.32	2.32	2.32	2.38	2.38	2.38	2.48	2.48	2.48	2.56
1338	1	1	0	0.09	0.2	0.23	0.34	0.62	0.77	0.78	0.93	1.13	1.23	1.23	1.25	1.25	1.48	1.48	1.5	1.59	1.69	1.84	1.92	2.14	2.27	2.27	2.29	2.29	2.31	2.31	2.33	2.47	2.47	2.56	2.7	2.78	2.86	2.86	2.88	2.9	2.9	2.92	3.02	3.04	3.04	3.04	3.06	3.06	3.08
1306	1	2	0	0	0.31	0.31	0.45	0.6	0.6	0.6	0.76	1.05	1.24	1.36	1.38	1.38	1.38	1.57	1.72	1.9	1.95	2.11	2.13	2.13	2.15	2.33	2.33	2.33	2.49	2.49	2.49	2.49	2.58	2.66	2.8	2.96	3.05	3.18	3.43	3.66	3.78	3.8	3.82	3.84	3.97	3.99	4.01	4.09	4.09
1313	1	2	0.16	0.15	0.24	0.19	0.32	0.6	0.25	0.69	0.75	0.72	0.7	0.83	0.53	1	0.94	1.13	1.15	1.12	1.11	1.13	1.15	1.15	1.17	1.17	1.17	1.27	1.29	1.33	1.35	1.35	1.42	1.42	1.42	1.52	1.7	1.7	1.72	1.82	1.99	2.11	2.21	2.2	2.17	2.18	2.2	2.3	2.34
1341	1	2	0.03	0.21	0.3	0.42	0.53	0.53	0.58	0.69	0.81	0.81	0.79	0.79	0.93	0.93	0.98	1.13	1.18	1.18	1.18	1.39	1.39	1.39	1.39	1.39	1.39	1.54	1.57	1.67	1.67	1.67	1.76	1.78	1.88	2.03	2.03	2.03	2.14	2.26	2.26	2.26	2.26	2.26	2.26	2.33	2.38	2.38	2.38
1349	1	2	0.13	0.11	0.2	0.23	0.42	0.47	0.64	0.81	0.84	0.87	0.95	1.09	1.28	1.21	1.28	1.36	1.36	1.44	1.5	1.76	1.84	1.87	1.87	1.87	2.01	2.01	2.01	2.01	2.01	2.01	2.11	2.11	2.24	2.34	2.47	2.65	2.8	2.93	2.98	2.98	2.98	2.98	3.12	3.13	3.13	3.13	3.18
#Genotype: 1 = WT
*Treatment: 1 = Vehicle; 2 = CORT
[truncated: 59 more columns]

## Sheet: Fig 2E
ID	Genotype#	Treatment *	FI_1	FI_2	FI_3	FI_4	FI_5	FI_6	FI_7	FI_8	FI_9	FI_10	FI_11	FI_12	FI_13	FI_14	FI_15	FI_16	FI_17	FI_18	FI_19	FI_20	FI_21	FI_22	FI_23	FI_24	FI_25	FI_26	FI_27	FI_28	FI_29	FI_30	FI_31	FI_32	FI_33	FI_34	FI_35	FI_36	FI_37	FI_38	FI_39	FI_40	FI_41	FI_42	FI_43	FI_44	FI_45	FI_46	FI_47
1276	2	1	0	0	0.06	0.18	0.29	0.3	0.29	0.43	0.54	0.66	0.8	0.86	0.86	0.86	0.99	0.99	1.11	1.11	1.35	1.45	1.46	1.65	1.65	1.65	1.65	1.65	1.65	1.65	1.84	1.84	1.99	2.06	2.23	2.23	2.21	2.33	2.48	2.59	2.73	2.73	2.73	2.71	2.71	2.71	2.77	2.77	2.77
1286	2	1	0	0.18	0.52	0.49	0.66	0.55	0.9	0.87	0.93	0.93	1	1	1	1.26	1.21	1.2	1.22	1.5	1.5	1.47	1.49	1.78	1.78	1.78	1.8	1.8	1.8	1.93	1.93	1.93	1.93	1.94	2	2.05	2.07	2.12	2.2	2.18	2.2	2.2	2.32	2.37	2.32	2.45	2.43	2.39	2.44
1299	2	1	0	0.07	0.22	0.25	0.4	-0.26	0.67	0.76	0.76	0.84	0.98	0.98	1.12	1.3	1.36	1.39	1.39	1.39	1.48	1.48	1.63	1.75	1.75	1.97	1.97	1.97	2.09	2.09	2.14	2.37	2.37	2.37	2.38	2.44	2.44	2.44	2.54	2.59	2.59	2.59	2.59	2.68	2.68	2.68	2.86	2.9	2.9
1337	2	1	0	-0.03	0.08	0.15	0.35	0.36	0.49	0.69	0.79	0.79	0.9	0.91	0.93	1.08	1.18	1.18	1.19	1.19	1.39	1.46	1.46	1.56	1.6	1.6	1.78	1.92	1.92	1.88	2.03	2.11	2.11	2.11	2.11	2.12	2.22	2.22	2.3	2.4	2.4	2.4	2.4	2.4	2.4	2.42	2.51	2.51	2.53
1279	2	2	0	0.1	0.1	0.43	0.43	0.43	0.47	0.58	0.76	0.99	0.99	1.14	1.25	1.3	1.3	1.42	1.42	1.52	1.6	1.69	1.89	2	2	2	2	2	2	2.13	2.25	2.25	2.33	2.56	2.58	2.6	2.74	3	3	3	3.2	3.15	3.2	3.2	3.2	3.2	3.2	3.3	3.3
1291	2	2	0	0.16	0.27	0.51	0.54	0.54	0.57	0.75	0.92	1.03	1.07	1.09	1.21	1.27	1.27	1.27	1.27	1.27	1.29	1.29	1.42	1.4	1.4	1.48	1.48	1.56	1.7	1.75	1.73	1.89	2.07	2.16	2.4	2.52	2.52	2.56	2.62	2.63	2.63	2.63	2.63	2.89	2.87	2.98	3	2.98	2.98
1321	2	2	0.03	0.08	0.33	0.57	0.66	0.73	0.91	0.97	1.11	1.11	1.25	1.25	1.58	1.74	1.74	1.85	2.06	2.23	2.23	2.23	2.3	2.38	2.67	2.67	2.67	2.67	2.67	2.85	2.97	3.04	3.04	3.04	3.04	3.17	3.34	3.46	3.57	3.61	3.61	3.61	3.61	3.61	3.61	3.82	3.82	3.82	3.82
1340	2	2	0.07	0.24	0.39	0.47	0.52	0.62	0.79	0.72	0.89	0.85	0.87	1.09	1.28	1.25	1.25	1.27	1.32	1.68	1.68	1.79	1.85	1.88	1.88	1.88	1.88	1.88	1.88	1.9	1.9	1.9	2.05	2.12	2.12	2.48	2.42	2.49	2.56	2.7	2.7	2.7	2.7	2.7	2.7	2.86	2.86	2.86	2.86
#Genotype: 2 = HOM
*Treatment: 1 = Vehicle; 2 = CORT
[truncated: 59 more columns]

## Sheet: Fig 2F
ID	Genotype	Treatment	BW_23_08_17	Average_Lean_g	Average_Fat_g	Average_Free_Fluid_g	RER_1	RER_2	RER_3	RER_4	RER_5	RER_6	RER_7	RER_8	RER_9	RER_10	RER_11	RER_12	RER_13	RER_14	RER_15	RER_16	RER_17	RER_18	RER_19	RER_20	RER_21	RER_22	RER_23	RER_24	RER_25	RER_26	RER_27	RER_28	RER_29	RER_30	RER_31	RER_32	RER_33	RER_34	RER_35	RER_36	RER_37	RER_38	RER_39	RER_40	RER_41	RER_42	RER_43
1302	1	1	29.76	20.6563	6.23417	1.77333	0.819215	0.814157	0.794864	0.793104	0.802662	0.780454	0.811271	0.831853	0.855279	0.859652	0.837839	0.843541	0.867596	0.887739	0.873077	0.87417	0.825966	0.745719	0.77822	0.838081	0.819605	0.858636	0.863629	0.784326	0.846726	0.879754	0.865724	0.836661	0.862172	0.883105	0.888016	0.88605	0.910711	0.914865	0.906289	0.898319	0.90998	0.883029	0.911053	0.857641	0.763556	0.790737	0.775738
1309	1	1	31.77	22.3321	6.44367	1.33433	0.79993	0.85414	0.901768	0.910089	0.908575	0.969456	0.943335	0.939803	0.967068	0.948301	0.969132	0.981305	0.974876	0.990876	0.943121	0.985836	0.977052	0.968649	0.967779	0.962864	0.958194	0.95384	0.978312	0.945154	0.926154	0.999523	0.90904	0.815256	0.894452	0.914725	0.931743	0.938995	0.975067	0.97587	1.00927	0.950678	0.945988	0.948406	0.940575	0.867611	0.848768	0.906168	0.85612
1324	1	1	32.22	20.4941	7.54217	1.65783	0.850814	0.913435	0.877144	0.901835	0.892725	0.935855	0.919602	0.917975	0.917612	0.92752	0.945316	0.98451	0.936251	0.909003	0.922221	0.909985	0.921328	0.877963	0.903374	0.926366	0.909122	0.939803	0.915482	0.91562	0.929254	0.937738	0.920028	0.84387	0.848934	0.877113	0.950776	0.90123	0.913435	0.920252	0.987434	0.950605	0.918516	0.916312	0.907157	0.886558	0.801879	0.869573	0.796374
1338	1	1	27.86	19.1426	4.60967	1.51633	0.781769	0.777459	0.81135	0.851192	0.875333	0.91499	0.882869	0.911999	0.902307	0.924149	0.923415	0.917006	0.914281	0.909231	0.941871	0.959357	0.939712	0.944784	0.9604	0.923046	0.910985	0.9495	0.950807	0.91074	0.933841	0.957405	0.954132	0.859451	0.904948	0.927843	0.924853	0.920149	0.948262	0.938004	1.0185	0.884669	0.855835	0.866456	0.843981	0.876338	0.895456	0.927611	0.851852
1306	1	2	28.69	18.7921	6.15667	0.985833	0.904168	0.91099	0.904533	0.934558	0.961	0.940948	0.950245	0.971369	0.972023	0.955886	0.95904	0.956852	0.97333	0.981861	0.965035	0.970785	0.948889	0.926415	0.961427	0.956071	0.946623	0.989571	0.964316	0.934438	0.972299	0.994452	0.951097	0.926417	0.98713	0.940991	0.976018	0.962139	0.966648	0.955396	0.987201	0.960952	0.970171	0.958764	0.95126	0.950562	0.939111	0.938317	0.882283
1313	1	2	34.96	20.1496	10.5727	1.28683	0.843053	0.850027	0.859524	0.833839	0.843461	0.904642	0.873502	0.881456	0.890648	0.89316	0.909958	0.887906	0.916373	0.910998	0.911581	0.92031	0.933216	0.886043	0.903809	0.895678	0.770511	0.769841	0.821153	0.777914	0.753942	0.799087	0.901384	0.809212	0.846779	0.798936	0.850218	0.949617	0.844508	0.903268	1.06722	0.923183	0.915051	0.902085	0.93207	0.918444	0.923651	0.914344	0.924194
1341	1	2	30.43	17.8451	9.18917	1.10683	0.893667	0.884147	0.960565	0.962359	0.960807	0.977322	0.975751	0.981267	0.954074	0.994762	0.983753	0.998907	0.963402	0.967221	0.960002	0.982475	0.957463	0.958574	0.973104	0.941939	0.968824	0.977603	1.0123	0.949009	0.966726	0.969835	1.00142	0.903003	1.00317	0.931609	0.950986	0.989339	0.964511	0.968248	1.02778	1.02927	0.971638	0.950816	0.906424	0.951745	0.920068	0.916721	0.851934
1349	1	2	26.86	15.9276	6.98017	1.61033	0.785384	0.851908	0.887616	0.898043	0.922489	0.95589	0.954934	0.944658	0.923778	0.96987	0.942207	0.972743	0.954084	0.946334	0.960076	0.964203	0.951488	0.951317	0.97599	0.950358	0.948047	0.95048	1.00393	0.922195	0.928975	0.967001	0.955525	0.868787	0.89086	0.881062	0.976329	0.954871	0.952432	1.00863	0.988514	0.93313	0.950342	0.993688	0.974992	0.975114	1.06563	0.971968	0.943996
#Genotype: 1 = WT
*Treatment: 1 = Vehicle; 2 = CORT
[truncated: 37 more columns]

## Sheet: Fig 2G
ID	Genotype#	Treatment *	RER_1	RER_2	RER_3	RER_4	RER_5	RER_6	RER_7	RER_8	RER_9	RER_10	RER_11	RER_12	RER_13	RER_14	RER_15	RER_16	RER_17	RER_18	RER_19	RER_20	RER_21	RER_22	RER_23	RER_24	RER_25	RER_26	RER_27	RER_28	RER_29	RER_30	RER_31	RER_32	RER_33	RER_34	RER_35	RER_36	RER_37	RER_38	RER_39	RER_40	RER_41	RER_42	RER_43	RER_44	RER_45	RER_46	RER_47
1276	2	1	0.788161	0.916752	0.898341	0.928805	0.910483	0.953003	0.903754	0.960978	0.947845	0.929297	0.944908	0.938437	0.967055	0.961211	0.95458	0.964343	0.997524	0.962844	0.95708	0.959677	0.994224	0.963071	1.02272	0.982227	0.965157	0.908955	0.90837	0.817232	0.946429	0.966824	0.94008	0.947531	0.935217	0.961652	1.06741	0.971737	0.956303	0.933379	0.93804	0.940426	0.93657	0.921436	0.851175	0.906019	0.895832	0.922553	0.811556
1286	2	1	0.888806	0.931124	0.927878	0.930885	0.927433	0.988135	0.954447	0.974057	0.957831	0.96616	0.999596	0.995653	0.961983	0.980731	0.984449	0.976489	0.994121	0.974782	0.980512	0.990779	0.933344	1.00339	1.01268	0.981242	0.973198	0.957823	0.940256	0.912434	0.943845	0.881058	0.932669	0.875407	0.964882	0.966803	0.999167	0.96097	0.967875	0.949174	0.923873	0.908039	0.871298	0.965726	0.936283	0.954893	0.941318	0.94859	0.929459
1299	2	1	0.788103	0.835667	0.847631	0.85828	0.876532	0.917586	0.904135	0.911176	0.896673	0.916343	0.935402	0.949002	0.944531	0.928223	0.921549	0.904872	0.877641	0.891921	0.903921	0.947527	0.922161	0.91668	0.960858	0.924906	0.896506	0.931768	0.930855	0.855436	0.914967	0.913663	0.896362	0.911236	0.898362	0.891823	0.990696	0.882136	0.893969	0.898858	0.815744	0.826926	0.860609	0.86538	0.872893	0.829186	0.874306	0.878902	0.879314
1337	2	1	0.764342	0.807583	0.80727	0.868932	0.847361	0.927122	0.845819	0.914695	0.909039	0.929034	0.944742	0.918046	0.91448	0.939782	0.883211	0.943551	0.911357	0.84445	0.939718	0.93517	0.919159	0.915787	1.00454	0.875703	0.924343	0.912949	0.937663	0.859614	0.94108	0.88716	0.923314	0.907165	0.907962	0.870481	0.980422	0.873784	0.934606	0.917436	0.867423	0.902463	0.866016	0.840363	0.861766	0.830534	0.833715	0.929578	0.810774
1279	2	2	0.808817	0.846745	0.880773	0.93482	0.939281	0.937498	0.92479	0.948122	0.941896	0.96916	0.981394	0.968155	0.946944	0.96938	1.00678	0.963024	0.975573	0.968454	1.00022	0.981624	0.962498	0.938804	0.97201	0.966039	0.944235	0.949447	0.961411	0.914169	0.955053	0.966225	0.992957	0.96166	0.97704	0.987049	1.01581	0.94327	0.975167	0.958887	0.937889	0.940089	0.897391	0.887426	0.866797	0.951742	0.911611	0.866704	0.948358
1291	2	2	0.911483	0.904685	0.958316	0.95281	0.940727	1.05362	0.975505	0.981137	0.979693	0.978358	0.978321	1.00966	1.01475	0.996403	1.00064	1.01733	1.00556	0.956654	0.927829	0.969551	0.952018	1.00985	0.979459	0.93255	0.981351	0.972474	0.96666	0.914183	1.0213	0.952999	0.968511	0.924442	0.978417	0.972436	1.09909	0.986737	0.986981	1.00505	0.924222	0.994427	0.948704	0.968329	0.962414	0.953193	1.0003	0.925032	0.93136
1321	2	2	0.826367	0.868695	0.93167	0.942093	0.971473	0.971518	0.957551	1.00423	0.955531	0.993566	1.0031	0.984385	0.972455	0.968772	0.979306	0.986765	0.98048	0.978283	1.00676	1.01377	0.984402	0.999595	0.976433	0.970845	0.993611	1.02029	1.00371	0.928929	0.972964	0.96648	1.05604	0.977017	1.01422	0.981608	1.02892	0.988208	0.974333	0.971125	1.00924	0.965181	0.974903	0.920295	0.921425	0.897024	0.959543	0.945771	0.994878
1340	2	2	0.830135	0.8572	0.919627	0.930593	0.918326	0.965138	0.949141	0.946323	0.949505	0.938339	0.987359	0.982757	0.951064	0.928053	0.986898	1.02054	0.974202	0.946204	0.952075	0.978166	0.968962	0.978419	1.0429	0.957129	0.972097	0.976954	0.981942	0.908122	0.959139	0.934149	0.952713	0.982284	0.941149	0.952611	0.98273	0.951634	0.955767	0.960785	0.91132	0.970811	0.937943	0.998779	0.96244	0.954204	1.00845	0.951345	0.926849
#Genotype: 2 = HOM
*Treatment: 1 = Vehicle; 2 = CORT
[truncated: 33 more columns]

## Sheet: Fig 2H
ID	Genotype#	Treatment *	BW_g	TEE_1	TEE_2	TEE_3	TEE_4	TEE_5	TEE_6	TEE_7	TEE_8	TEE_9	TEE_10	TEE_11	TEE_12	TEE_13	TEE_14	TEE_15	TEE_16	TEE_17	TEE_18	TEE_19	TEE_20	TEE_21	TEE_22	TEE_23	TEE_24	TEE_25	TEE_26	TEE_27	TEE_28	TEE_29	TEE_30	TEE_31	TEE_32	TEE_33	TEE_34	TEE_35	TEE_36	TEE_37	TEE_38	TEE_39	TEE_40	TEE_41	TEE_42	TEE_43	TEE_44	TEE_45	TEE_46
1302	1	1	29.76	0.583168	0.744423	0.730206	0.74296	0.699675	0.73481	0.751152	0.730927	0.747439	0.719388	0.602471	0.751096	0.719836	0.782955	0.706404	0.627109	0.38946	0.462249	0.436127	0.633375	0.655178	0.597787	0.463659	0.417861	0.545724	0.433375	0.384617	0.506762	0.616701	0.420677	0.567979	0.431343	0.529291	0.407204	0.461799	0.464606	0.548847	0.757433	0.667172	0.488425	0.279784	0.319576	0.297298	0.316935	0.309273	0.327437
1309	1	1	31.77	0.569528	0.467554	0.659255	0.653816	0.582427	0.597833	0.588133	0.63599	0.590591	0.696962	0.620653	0.64051	0.354731	0.331941	0.427068	0.666527	0.619168	0.645955	0.671289	0.576962	0.678918	0.646267	0.542905	0.424806	0.280496	0.302262	0.363748	0.31328	0.359843	0.527313	0.576542	0.570976	0.310935	0.539136	0.645784	0.643493	0.529155	0.528717	0.348519	0.2718	0.280783	0.288891	0.289253	0.52357	0.530226	0.497223
1324	1	1	32.22	0.584947	0.470919	0.646906	0.641298	0.606091	0.60741	0.588428	0.50397	0.333504	0.613707	0.423825	0.352287	0.579552	0.592957	0.5871	0.463762	0.369703	0.374196	0.32159	0.3603	0.438329	0.337917	0.607658	0.644867	0.3753	0.375087	0.354683	0.467978	0.380347	0.617884	0.370209	0.387804	0.576574	0.606716	0.379157	0.337153	0.390552	0.410558	0.350797	0.474699	0.347059	0.31505	0.38973	0.321667	0.305972	0.347027
1338	1	1	27.86	0.521087	0.549403	0.634298	0.437413	0.671955	0.654067	0.632838	0.556217	0.661506	0.626239	0.607143	0.348946	0.37857	0.417678	0.398372	0.566389	0.370864	0.465491	0.642326	0.630861	0.644858	0.687121	0.616494	0.535934	0.38023	0.34196	0.331237	0.375086	0.352986	0.463971	0.386886	0.381103	0.629564	0.63553	0.573495	0.466969	0.395891	0.297396	0.351391	0.312596	0.289747	0.298607	0.308752	0.416385	0.307182	0.28953
1306	1	2	28.69	0.419134	0.5817	0.609446	0.447652	0.426429	0.570683	0.428632	0.536737	0.423273	0.729807	0.653361	0.699084	0.432608	0.425752	0.559706	0.678535	0.662358	0.687215	0.74428	0.613021	0.39639	0.390151	0.469777	0.534425	0.524891	0.376167	0.452745	0.410833	0.370326	0.531793	0.40951	0.437105	0.677419	0.706383	0.653199	0.684322	0.707198	0.716593	0.692401	0.383784	0.366865	0.354491	0.503675	0.34294	0.353316	0.520361
1313	1	2	34.96	0.611945	0.579426	0.605597	0.592659	0.595349	0.603446	0.618578	0.649114	0.632884	0.5276	0.518834	0.546783	0.597714	0.602204	0.595025	0.587453	0.470299	0.528806	0.457395	0.31413	0.290514	0.287231	0.326766	0.274429	0.285753	0.579734	0.488104	0.343098	0.291803	0.330563	0.28263	0.274253	0.558451	0.555214	0.332328	0.323207	0.289756	0.612687	0.622726	0.583248	0.580329	0.509725	0.301172	0.275874	0.276872	0.450611
1341	1	2	30.43	0.40355	0.488868	0.485248	0.468419	0.48821	0.424048	0.330383	0.482366	0.424597	0.280448	0.318954	0.255525	0.342288	0.348339	0.476102	0.484481	0.336579	0.237372	0.23847	0.321893	0.270801	0.275844	0.257522	0.259974	0.260586	0.283772	0.38552	0.384833	0.265777	0.296212	0.344916	0.273186	0.377473	0.474326	0.289384	0.251966	0.39758	0.47524	0.334555	0.224783	0.21816	0.232983	0.226515	0.417585	0.39015	0.235688
1349	1	2	26.86	0.565967	0.552753	0.485397	0.47389	0.453428	0.455238	0.627338	0.616322	0.586176	0.367878	0.480564	0.537347	0.550675	0.475393	0.478683	0.47378	0.432345	0.482324	0.522052	0.643188	0.59247	0.439624	0.33171	0.393144	0.447709	0.383238	0.412631	0.386358	0.351982	0.344385	0.37608	0.515483	0.507493	0.361891	0.580712	0.563466	0.51542	0.378492	0.443761	0.347174	0.303447	0.309853	0.426569	0.348305	0.285544	0.31445
#Genotype: 1 = WT
*Treatment: 1 = Vehicle; 2 = CORT
[truncated: 34 more columns]

## Sheet: Fig 2I
ID	Genotype#	Treatment *	BW_g	TEE_1	TEE_2	TEE_3	TEE_4	TEE_5	TEE_6	TEE_7	TEE_8	TEE_9	TEE_10	TEE_11	TEE_12	TEE_13	TEE_14	TEE_15	TEE_16	TEE_17	TEE_18	TEE_19	TEE_20	TEE_21	TEE_22	TEE_23	TEE_24	TEE_25	TEE_26	TEE_27	TEE_28	TEE_29	TEE_30	TEE_31	TEE_32	TEE_33	TEE_34	TEE_35	TEE_36	TEE_37	TEE_38	TEE_39	TEE_40	TEE_41	TEE_42	TEE_43	TEE_44	TEE_45	TEE_46
1276	2	1	31.12	0.533732	0.552538	0.508589	0.526288	0.548009	0.529034	0.572708	0.51886	0.725384	0.6506	0.666046	0.619095	0.366115	0.368562	0.534443	0.545281	0.438479	0.613496	0.70638	0.627157	0.4278	0.611396	0.391938	0.441322	0.543374	0.468284	0.360843	0.421607	0.429218	0.544192	0.677733	0.660598	0.639589	0.567699	0.364261	0.737909	0.692505	0.629263	0.640921	0.527576	0.324611	0.378786	0.404158	0.51004	0.402467	0.469129
1286	2	1	30.34	0.431942	0.553051	0.538449	0.362399	0.410105	0.547562	0.518199	0.503421	0.47485	0.33188	0.308243	0.418772	0.377937	0.528926	0.475708	0.457019	0.309934	0.344573	0.329351	0.419332	0.294958	0.492311	0.28953	0.380765	0.312941	0.421842	0.332008	0.511089	0.291643	0.261585	0.285929	0.311382	0.287684	0.304136	0.482442	0.463879	0.289013	0.25179	0.284156	0.325312	0.404295	0.498176	0.428926	0.23881	0.277223	0.295227
1299	2	1	27.64	0.454205	0.366684	0.554274	0.343002	0.418057	0.610638	0.595906	0.375097	0.429712	0.381083	0.430514	0.343736	0.599933	0.637747	0.609563	0.519511	0.288859	0.326203	0.343649	0.344826	0.550041	0.56829	0.306911	0.601154	0.367592	0.355179	0.364791	0.358159	0.507769	0.563833	0.414088	0.292959	0.473896	0.468539	0.300464	0.307884	0.444056	0.340333	0.331625	0.25578	0.41053	0.289805	0.286961	0.266563	0.488437	0.346295
1337	2	1	28.81	0.490001	0.429533	0.375284	0.479629	0.541352	0.317342	0.447663	0.605035	0.517717	0.587873	0.562412	0.290291	0.295568	0.499365	0.526443	0.303256	0.348576	0.30713	0.456433	0.411863	0.317754	0.471861	0.337448	0.415896	0.535631	0.610818	0.296517	0.517534	0.632384	0.533625	0.318233	0.385255	0.419158	0.381464	0.330008	0.447398	0.583528	0.487658	0.290908	0.345361	0.276228	0.334977	0.309661	0.315036	0.53167	0.400828
1279	2	2	32.58	0.406561	0.414354	0.604949	0.644102	0.446442	0.438343	0.442515	0.497759	0.463877	0.632146	0.500565	0.628911	0.613278	0.413563	0.379917	0.493783	0.420737	0.471535	0.44643	0.732263	0.728367	0.646968	0.41888	0.351734	0.412915	0.353727	0.444306	0.395315	0.533484	0.446395	0.665152	0.650115	0.421569	0.385225	0.707074	0.692098	0.386731	0.493747	0.64474	0.668209	0.495635	0.287073	0.298728	0.245847	0.281786	0.576182
1291	2	2	32.44	0.528475	0.582444	0.581716	0.4978	0.512447	0.329036	0.440645	0.565649	0.565911	0.488924	0.454573	0.387589	0.468113	0.376903	0.320141	0.290557	0.318619	0.401121	0.295135	0.294451	0.369964	0.338874	0.286635	0.405431	0.400719	0.482911	0.50675	0.349469	0.391383	0.550181	0.635858	0.605483	0.568877	0.575948	0.310377	0.517647	0.405226	0.297715	0.294066	0.282981	0.323877	0.551025	0.517028	0.534378	0.29433	0.25884
1321	2	2	32.81	0.471772	0.341894	0.501019	0.607197	0.405634	0.442273	0.521843	0.385357	0.445901	0.482509	0.420904	0.459357	0.596141	0.60095	0.399773	0.506269	0.591839	0.646849	0.390587	0.376955	0.499903	0.474815	0.55532	0.394662	0.363388	0.374674	0.379954	0.50846	0.548688	0.469089	0.324395	0.349148	0.31905	0.449804	0.509483	0.565629	0.545376	0.51825	0.309009	0.293472	0.304026	0.262168	0.364115	0.372028	0.283132	0.276884
1340	2	2	31.52	0.552762	0.659055	0.618425	0.605359	0.513531	0.649455	0.583714	0.588213	0.610032	0.394871	0.361758	0.57553	0.605443	0.517479	0.34721	0.364403	0.496697	0.508813	0.348535	0.569985	0.556361	0.358989	0.297045	0.339442	0.319536	0.299174	0.426534	0.316213	0.338292	0.336274	0.531247	0.556957	0.567413	0.572113	0.51345	0.355998	0.592349	0.537216	0.45573	0.296533	0.28035	0.295974	0.338667	0.50596	0.281562	0.282481
#Genotype: 2 = HOM
*Treatment: 1 = Vehicle; 2 = CORT
[truncated: 34 more columns]

## Sheet: Fig 2 Suppl 1A
Sample	Genotype #	CORT_ng_ml
1302	1	50.166
1306	1	47.349
1309	1	59.333
1313	1	46.396
1324	1	66.364
1334	1	56.132
1338	1	96.799
1341	1	79.949
1349	1	68.287
1276	2	100.741
1279	2	91.408
1286	2	42.527
1291	2	112.763
1299	2	107.32
1321	2	39.766
1337	2	55.172
1340	2	40.984
1342	2	66.113
1344	2	79.056
#Genotype: 1 = WT; 2 = HOM

## Sheet: Fig 2 Suppl 1B
ID	Genotype	treatment	Basal_CORT__ng_ml
1302	1	1	30.354
1309	1	1	39.462
1324	1	1	15.675
1338	1	1	28.001
1306	1	2	195.899
1313	1	2	45.921
1334	1	2	89.828
1341	1	2	85.942
1349	1	2	158.291
1276	2	1	3.5
1286	2	1	3.5
1299	2	1	3.5
1337	2	1	41.213
1342	2	1	6.237
1279	2	2	240.385
1291	2	2	128.967
1321	2	2	133.572
1340	2	2	110.494
1344	2	2	74.311
#Genotype: 1 = WT; 2 = HOM
*Treatment: 1 = Vehicle; 2 = CORT

[truncated: 5 more sheets: Fig 2 Suppl 1C, Fig 2 Suppl 2A, Fig 2 Suppl 2B, Fig 2 Suppl 2C, Fig 2 Suppl 2D]
