# Supplementary material for: A genetic variant of fatty acid amide hydrolase (FAAH) exacerbates hormone-mediated orexigenic feeding in mice
Source: eLife. 2023 Apr 11;12:e81919. doi: 10.7554/eLife.81919 (PMC10159625; doi:10.7554/eLife.81919)
Supplement: Figure 3—source data 1. [file elife-81919-fig3-data1.xlsx]

## Sheet: Fig 3A
ID	Genotype#	Treatment *	FI_01	FI_02	FI_03	FI_04	FI_05	FI_06	FI_07	FI_08	FI_09	FI_10	FI_11	FI_12	FI_13	FI_14	FI_15	FI_16	FI_17	FI_18	FI_19	FI_20	FI_21	FI_22	FI_23	FI_24	FI_25	FI_26	FI_27	FI_28	FI_29	FI_30	FI_31	FI_32	FI_33	FI_34	FI_35	FI_36	FI_37	FI_38	FI_39	FI_40	FI_41	FI_42	FI_43	FI_44	FI_45	FI_46	FI_47
1473	1	1	0	0	0	0.12	0.21	0.39	0.37	0.59	0.8	0.78	0.76	1.11	1.18	1.18	1.18	1.27	1.51	1.51	1.51	1.51	1.49	1.49	1.51	1.51	1.81	1.94	1.92	1.92	1.92	1.89	1.89	1.98	2.15	2.13	2.12	2.19	2.25	2.34	2.52	2.58	2.56	2.56	2.56	2.54	2.54	2.54	2.64
1483	1	1	0	0	0.19	0.19	0.21	0.33	0.59	0.8	0.8	0.8	0.84	1.04	1.14	1.19	1.19	1.43	1.9	2.1	2.77	2.77	2.77	2.77	2.77	2.81	2.93	2.93	2.93	3.03	3.34	3.41	3.41	3.41	3.41	3.41	3.41	3.51	3.66	3.71	3.98	3.98	3.98	3.98	3.98	3.98	3.98	4.1	4.17
1509	1	1	0	0	0	0.03	0.03	0.09	0.25	0.31	0.36	0.6	0.66	0.81	0.83	0.94	1.08	1.14	1.2	1.2	1.2	1.2	1.22	1.22	1.22	1.36	1.68	1.68	1.69	1.69	1.69	1.71	1.76	1.83	1.83	1.83	1.83	1.85	1.96	2.2	2.34	2.51	2.51	2.51	2.51	2.53	2.53	2.53	2.76
1526	1	1	0	0	0.14	0.32	0.48	0.61	0.78	0.82	1.38	1.63	1.67	1.69	1.71	1.73	1.75	1.91	2.34	2.36	2.38	2.4	2.44	2.46	2.43	3.01	3.05	3.07	3.11	3.15	3.46	3.61	3.65	3.67	3.69	3.73	3.73	3.73	3.84	3.98	4	4.01	4.03	4.11	4.11	4.13	4.17	4.17	4.19
1540	1	1	Dysfunctional Scale
1471	1	1	0	0.08	0.08	0.08	0.28	0.3	0.46	0.58	0.6	0.76	0.76	0.76	0.76	0.94	0.94	1.12	1.12	1.12	1.35	1.48	1.49	1.94	1.98	1.98	1.98	2.12	2.12	2.13	2.13	2.14	2.28	2.32	2.32	2.32	2.32	2.53	2.66	2.66	2.68	2.68	2.88	2.96	2.98	2.98	2.98	2.98	2.98
1553	1	1	0.04	0.05	0.05	0.12	0.12	0.2	0.27	0.41	0.61	0.85	0.87	0.87	0.99	1.05	1.05	1.35	1.47	1.8	1.82	1.82	1.92	2.16	2.27	2.27	2.29	2.38	2.75	2.93	3.02	3.04	3.04	3.06	3.06	3.08	3.08	3.25	3.3	3.44	3.54	3.56	3.56	3.7	3.82	3.74	3.76	3.78	3.78
1302	1	1	0	0.13	0.23	0.45	0.51	0.62	0.62	0.83	0.92	0.9	1.05	1.05	1.03	1.03	1.23	1.21	1.3	1.39	1.59	1.59	1.59	1.59	1.78	1.98	2.01	2.07	2.07	2.09	2.09	2.09	2.14	2.23	2.34	2.34	2.36	2.47	2.47	2.58	2.64	2.79	2.81	2.88	2.9	2.9	2.9	2.9	2.9
1324	1	1	0.16	0.26	0.31	0.53	0.62	0.76	0.93	0.9	0.9	1.07	1.07	1.07	1.25	1.23	1.23	1.23	1.38	1.4	1.4	1.57	1.76	1.8	1.82	1.83	1.97	1.97	1.97	1.97	1.97	2.05	2.05	2.03	2.31	2.31	2.38	2.5	2.59	2.69	2.71	2.71	2.71	2.71	2.75	2.77	2.77	2.77	2.87
1338	1	1	0.13	0.2	0.31	0.39	0.52	0.63	0.63	0.77	0.82	0.92	1.13	1.28	1.31	1.31	1.31	1.33	1.44	1.5	1.5	1.78	1.89	1.89	1.89	1.89	1.89	1.89	1.98	2.18	2.27	2.35	2.4	2.4	2.4	2.4	2.55	2.63	2.76	2.76	2.76	2.76	2.84	2.86	2.86	2.86	2.86	2.86	2.86
1475	1	2	0	0	0	0.12	0.12	0.16	0.32	0.42	0.54	0.72	0.78	0.81	0.81	1.11	1.07	1.14	1.22	1.22	1.22	1.37	1.37	1.56	1.6	1.59	1.71	1.71	1.71	1.89	1.84	2.04	2.1	2.13	2.19	2.31	2.31	2.39	2.39	2.55	2.65	2.65	2.65	2.65	2.78	2.78	2.78	3.01	3.01
1495	1	2	0.05	0.09	0.11	0.14	0.07	0.46	0.45	0.54	0.56	0.69	0.72	0.79	0.83	0.83	0.85	1.19	1.34	1.49	1.49	1.51	1.51	1.61	1.92	2.16	2.43	2.44	2.44	2.44	2.46	2.46	2.46	2.48	2.71	2.94	3.19	3.19	3.21	3.21	3.21	3.31	3.62	3.71	3.73	3.73	3.73	3.75	3.75
1534	1	2	0	0	0	0.14	0.26	0.37	0.43	0.55	0.69	0.82	0.79	1.07	1.14	1.2	1.37	1.52	1.65	1.65	1.96	1.89	1.88	2.18	2.18	2.18	2.18	2.18	2.18	2.38	2.37	2.37	2.5	2.5	2.55	2.55	2.7	2.7	2.7	2.97	3.08	3.08	3.08	3.22	3.22	3.22	3.4	3.4	3.4
1538	1	2	0.03	0.03	0.05	0.16	0.3	0.37	0.58	0.85	0.97	0.98	1.1	1.27	1.29	1.29	1.52	1.74	1.74	1.74	1.89	2.08	2.08	2.08	2.17	2.17	2.4	2.4	2.4	2.56	2.61	2.61	2.61	2.71	2.71	2.96	3.02	3.02	3.13	3.21	3.29	3.37	3.38	3.38	3.38	3.59	3.59	3.59	3.61
1544	1	2	0.05	0.05	0.09	0.24	0.26	0.38	0.47	0.47	0.62	0.81	0.84	0.9	0.95	1.01	1.13	1.26	1.26	1.29	1.44	1.48	1.48	1.57	1.59	1.76	1.96	2.03	2.03	2.03	2.03	2.22	2.25	2.25	2.25	2.49	2.56	2.56	2.7	2.77	2.81	2.81	2.81	2.92	2.92	2.92	2.98	3	3.09
1306	1	2	0	0.09	0.09	0.39	0.51	0.78	0.78	1	1	1.12	1.12	1.22	1.36	1.36	1.34	1.64	1.62	1.84	1.82	2.01	1.99	1.99	1.99	1.97	1.97	2.06	2.15	2.27	2.25	2.25	2.36	2.36	2.36	2.42	2.53	2.69	2.81	3.01	3.03	3.03	3.03	3.03	3.03	3.03	3.03	3.03	3.03
1313	1	2	0.06	0.1	0.14	0.34	0.42	0.56	0.56	0.78	0.82	1.02	1.04	1.15	1.26	1.26	1.46	1.5	1.5	1.66	1.66	1.79	1.79	1.88	2.08	2.19	2.19	2.19	2.19	2.37	2.37	2.37	2.37	2.37	2.49	2.49	2.63	2.73	2.73	2.95	2.99	3.06	3.06	3.06	3.23	3.23	3.23	3.34	3.34
1341	1	2	0.04	0.16	0.21	0.17	0.33	0.44	0.64	0.64	0.64	0.81	0.72	0.87	1	1.08	1.16	1.18	1.16	1.16	1.14	1.23	1.23	1.44	1.5	1.63	1.63	1.63	1.63	1.61	1.61	1.8	1.8	1.88	1.98	1.96	2.14	2.14	2.14	2.24	2.26	2.26	2.26	2.26	2.28	2.46	2.46	2.46	2.48
1349	1	2	0.03	0.15	0.25	0.27	0.33	0.59	0.64	0.81	0.82	0.97	1.03	1.2	1.32	1.29	1.39	1.46	1.52	1.56	1.74	1.95	1.89	1.92	1.92	1.92	1.97	2.06	2.06	2.06	2.14	2.24	2.4	2.4	2.45	2.56	2.68	2.78	2.78	2.86	2.86	2.86	2.86	3.04	3.04	3.04	3.04	3.04	3.15
#Genotype: 1 = WT
*Treatment: 1 = Vehicle; 2 = CORT
[truncated: 109 more columns]

## Sheet: Fig 3B
ID	Genotype#	Treatment *	FI_01	FI_02	FI_03	FI_04	FI_05	FI_06	FI_07	FI_08	FI_09	FI_10	FI_11	FI_12	FI_13	FI_14	FI_15	FI_16	FI_17	FI_18	FI_19	FI_20	FI_21	FI_22	FI_23	FI_24	FI_25	FI_26	FI_27	FI_28	FI_29	FI_30	FI_31	FI_32	FI_33	FI_34	FI_35	FI_36	FI_37	FI_38	FI_39	FI_40	FI_41	FI_42	FI_43	FI_44	FI_45	FI_46	FI_47
1476	2	1	0	0	0.06	0.09	0.09	0.13	0.21	0.19	0.22	0.41	0.58	0.62	0.65	0.72	0.89	0.96	1.01	1.05	1.12	1.12	1.1	1.2	1.18	1.25	1.25	1.28	1.3	1.19	1.38	1.39	1.5	1.48	1.57	1.59	1.59	1.58	1.58	1.78	1.81	1.81	1.81	1.85	1.85	1.83	1.83	2	2
1490	2	1	0	0	0.01	0.11	0.24	0.33	0.45	0.66	0.72	1.05	1.35	1.36	1.36	1.34	1.65	1.84	1.89	1.96	1.96	1.94	2.15	2.31	2.42	2.42	2.42	2.42	2.52	2.71	2.66	2.66	2.66	2.9	2.95	2.95	3.08	3.08	3.08	3.33	3.4	3.38	3.38	3.38	3.47	3.47	3.47	3.47	3.57
1496	2	1	0	0.04	0.13	0.17	0.27	0.36	0.46	0.6	0.81	0.81	0.81	1.02	1.09	1.09	1.3	1.46	1.54	1.78	1.83	1.83	1.83	1.83	1.83	2.03	2.17	2.17	2.17	2.17	2.17	2.19	2.26	2.43	2.43	2.43	2.43	2.62	2.62	2.62	2.67	2.8	2.82	2.81	2.81	2.81	2.81	2.81	2.81
1527	2	1	0.06	0.06	0.12	0.15	0.31	0.53	0.51	0.62	0.72	0.84	0.88	0.88	0.88	0.88	1	1.34	1.45	1.49	1.49	1.49	1.49	1.49	1.85	1.88	1.88	1.88	1.88	2	2.23	2.31	2.31	2.31	2.45	2.45	2.71	2.79	2.86	2.9	2.98	3.08	3.06	3.15	3.18	3.2	3.2	3.18	3.18
1552	2	1	0	0	0	0.07	0.26	0.38	0.51	0.77	0.79	0.79	0.79	1.08	1.23	1.28	1.38	1.38	1.38	1.38	1.6	1.73	1.73	1.9	1.9	1.9	1.9	2.13	2.38	2.38	2.38	2.4	2.72	2.9	3.05	3.05	3.05	3.05	3.2	3.37	3.37	3.37	3.37	3.45	3.63	3.65	3.65	3.65	3.65
1556	2	1	0.07	0.07	0.06	0.06	0.13	0.13	0.15	0.23	0.36	0.36	0.38	0.49	0.8	0.96	1.04	1.04	1.04	1.06	1.26	1.32	1.32	1.32	1.32	1.58	1.72	1.81	1.81	1.82	2.02	2.02	2.02	2.16	2.16	2.16	2.16	2.39	2.48	2.69	2.69	2.69	2.75	2.77	2.77	2.77	2.84	2.94	2.94
1276	2	1	0	0.13	0.22	0.21	0.32	0.32	0.3	0.41	0.55	0.6	0.59	0.59	0.59	0.81	0.84	0.88	0.88	0.86	0.86	0.86	0.86	0.86	0.84	1.06	1.06	1.06	1.04	1.13	1.11	1.29	1.45	1.43	1.43	1.62	1.74	1.74	1.81	1.91	1.91	1.89	1.89	2.02	2.02	2.02	2.02	2.02	2
1286	2	1	0	0.07	0.24	0.28	0.43	0.52	0.54	0.66	0.66	0.73	0.78	0.78	0.78	1.05	1.15	1.28	1.28	1.26	1.26	1.26	1.34	1.42	1.52	1.52	1.64	1.82	1.91	1.91	1.91	1.91	1.91	2.05	2.1	2.1	2.19	2.23	2.36	2.36	2.38	2.4	2.44	2.48	2.48	2.48	2.48	2.59	2.59
1299	2	1	0.17	0.25	0.52	0.56	0.64	0.78	0.8	1.11	1.14	1.14	1.34	1.42	1.49	1.66	1.66	1.66	1.66	1.74	1.74	1.77	2.12	2.12	2.2	2.2	2.2	2.3	2.3	2.32	2.56	2.62	2.62	2.72	2.72	2.72	2.88	2.88	2.93	3.04	3.12	3.13	3.13	3.13	3.13	3.13	3.13	3.13	3.13
1337	2	1	0	0.11	0.22	0.22	0.33	0.57	0.67	0.67	0.65	0.84	0.95	0.95	0.93	0.93	0.93	1.22	1.22	1.22	1.22	1.39	1.66	1.9	1.9	1.92	1.92	1.92	1.92	1.98	2.02	2.02	2.21	2.36	2.6	2.6	2.6	2.6	2.66	2.78	2.9	2.9	2.9	2.9	2.9	2.9	2.9	3.01	3.04
1474	2	2	0	0	0.17	0.17	0.3	0.33	0.51	0.51	0.65	0.79	0.78	0.89	1.02	1.1	1.21	1.19	1.18	1.27	1.27	1.51	1.62	1.62	1.62	1.62	1.6	1.67	1.67	1.67	1.65	1.76	1.81	1.99	1.99	1.99	2.09	2.16	2.16	2.28	2.36	2.48	2.6	2.6	2.65	2.87	2.9	2.9	2.9
1482	2	2	0	0	0	0.22	0.26	0.54	0.77	0.86	1.22	1.44	1.43	1.43	1.54	1.93	2.12	2.12	2.12	2.45	2.45	2.45	2.45	2.73	2.92	2.92	2.92	2.92	3.15	3.29	3.29	3.29	3.54	3.57	3.57	3.57	3.55	3.71	3.82	3.82	3.82	3.98	4	4	4	4	3.98	3.98	4.01
1491	2	2	0.12	0.14	0.15	0.29	0.46	0.6	0.82	0.98	1	1.13	1.58	2.17	2.28	2.33	2.33	2.51	2.69	2.8	2.8	2.8	2.82	3.09	3.26	3.26	3.26	3.43	3.43	3.59	3.59	3.61	3.74	3.74	3.8	3.8	3.92	4.02	4.13	4.13	4.44	4.48	4.55	4.57	4.57	4.57	4.57	4.59	4.59
1541	2	2	0	0	0.12	0.15	0.23	0.43	0.53	0.72	0.88	1.02	1.11	1.11	1.32	1.41	1.78	1.79	1.97	1.97	2.16	2.16	2.18	2.18	2.42	2.46	2.46	2.58	2.66	2.76	2.76	2.76	2.97	2.97	3.1	3.15	3.32	3.43	3.59	3.72	3.83	3.83	3.85	3.85	3.95	4.13	4.21	4.21	4.21
1546	2	2	0	0	0	0	0.11	0.11	0.29	0.48	0.48	0.65	0.75	0.75	0.75	0.96	1.09	1.09	1.09	1.09	1.28	1.36	1.36	1.36	1.36	1.59	1.61	1.61	1.61	1.8	1.89	1.89	1.89	2.1	2.1	2.1	2.1	2.1	2.27	2.29	2.37	2.48	2.48	2.5	2.5	2.59	2.59	2.59	2.59
1554	2	2	0.09	0.11	0.11	0.11	0.11	0.11	0.3	0.3	0.45	0.65	0.74	0.74	0.74	0.91	0.91	0.91	0.91	1.1	1.26	1.36	1.36	1.36	1.5	1.5	1.71	1.82	1.81	1.82	1.82	1.96	1.96	1.96	2.25	2.3	2.32	2.32	2.32	2.44	2.48	2.48	2.71	2.71	2.71	2.71	2.71	2.71	2.71
1557	2	2	0	0	0	0	0	0.13	0.3	0.29	0.47	0.54	0.68	0.68	0.68	0.8	0.8	0.8	0.8	1.01	1.24	1.33	1.38	1.38	1.43	1.74	1.88	2	2.04	2.04	2.04	2.06	2.06	2.06	2.36	2.36	2.36	2.36	2.36	2.66	2.66	2.66	2.66	2.66	2.66	2.66	2.7	2.7	2.7
1279	2	2	0.13	0.18	0.2	0.28	0.39	0.39	0.56	0.66	0.66	0.93	1.07	1.17	1.19	1.27	1.27	1.32	1.59	1.59	1.57	1.9	2.03	2.21	2.28	2.28	2.28	2.28	2.28	2.43	2.74	2.79	2.79	2.79	2.77	2.77	2.99	3.27	3.37	3.37	3.37	3.37	3.35	3.35	3.67	3.67	3.67	3.67	3.67
1291	2	2	0	0.09	0.17	0.47	0.67	0.83	0.95	0.97	0.97	0.96	0.99	1.17	1.32	1.31	1.44	1.5	1.5	1.59	1.73	1.89	1.89	1.89	1.89	1.89	1.89	1.89	1.91	2	2	2.08	2.17	2.38	2.5	2.5	2.6	2.68	2.93	3.04	3.04	3.04	3.04	3.04	3.04	3.04	3.23	3.32	3.32
1321	2	2	0.05	0.13	0.2	0.39	0.7	0.82	0.92	1.04	1.14	1.14	1.17	1.48	1.53	1.53	1.51	1.62	1.62	1.89	2.03	2.03	2.11	2.15	2.11	2.24	2.26	2.26	2.43	2.59	2.59	2.59	2.61	2.8	2.82	2.91	2.91	3.07	3.25	3.25	3.23	3.36	3.36	3.4	3.57	3.69	3.69	3.69	3.79
1340	2	2	0.01	0.14	0.16	0.5	0.45	0.63	0.72	0.78	0.78	0.91	1.03	1.01	1.06	1.4	1.39	1.48	1.68	1.68	1.66	1.64	1.64	1.83	1.97	2.02	2.02	2.02	2.02	2.23	2.35	2.35	2.33	2.33	2.33	2.71	2.69	2.69	2.69	2.85	3	3	3	3	3	2.98	2.98	2.98	3.13
#Genotype: 2 = HOM
*Treatment: 1 = Vehicle; 2 = CORT
[truncated: 109 more columns]

## Sheet: Fig 3C
ID	Genotype#	Treatment *	Basal_BW	24h_CORT_BW	24h_CORT_BW_Change
1473	1	1	32.33	32.35	0.02
1483	1	1	30.73	30.76	0.03
1509	1	1	36	35.49	-0.51
1526	1	1	27.72	27.3	-0.42
1302	1	1	30.06	29.68	-0.38
1324	1	1	30.56	30.21	-0.35
1338	1	1	26.26	25.88	-0.38
1475	1	2	31.71	31.38	-0.33
1495	1	2	26.97	26.75	-0.22
1534	1	2	30.17	29.81	-0.36
1306	1	2	27.36	27.12	-0.24
1313	1	2	32.29	31.86	-0.43
1341	1	2	26.93	26.5	-0.43
1349	1	2	25.27	24.99	-0.28
1476	2	1	27.22	27.08	-0.14
1490	2	1	28.84	28.48	-0.36
1496	2	1	24.23	23.97	-0.26
1527	2	1	30.85	30.24	-0.61
1276	2	1	29.47	28.81	-0.66
1286	2	1	30.71	30.21	-0.5
1299	2	1	26.49	26.24	-0.25
1337	2	1	27.61	27.66	0.05
1474	2	2	26.53	27.47	0.94
1482	2	2	32.6	32.79	0.19
1491	2	2	27.72	27.82	0.1
1541	2	2	29.38	29.47	0.09
1279	2	2	29.9	29.61	-0.29
1291	2	2	29.37	29.23	-0.14
1321	2	2	30.22	30.65	0.43
1340	2	2	28.25	28.78	0.53
#Genotype: 1 = WT; 2 = HOM
*Treatment: 1 = Vehicle; 2 = CORT

## Sheet: Fig 3D
ID	Genotype#	Treatment *	AEA (pmol/g tissue)
1471	1	1	3.33766
1473	1	1	3.37634
1483	1	1	4.27273
1509	1	1	3.42391
1526	1	1	2.96774
1540	1	1	2.33058
1553	1	1	3.22951
1475	1	2	4.05195
1534	1	2	1.40278
1538	1	2	2.72109
1544	1	2	3.19697
1476	2	1	2.92708
1490	2	1	3.53982
1496	2	1	2.69565
1527	2	1	3.5
1552	2	1	3.53846
1556	2	1	4.35
1474	2	2	5.69231
1482	2	2	5.27778
1491	2	2	6.28571
1541	2	2	3.03546
1546	2	2	4.09023
1554	2	2	3.75439
1557	2	2	3.60748
#Genotype: 1 = WT; 2 = HOM
*Treatment: 1 = Vehicle; 2 = CORT

## Sheet: Fig 3E
ID	Genotype#	Treatment *	FI_1	FI_2	FI_3	FI_4	FI_5	FI_6	FI_7	FI_8	FI_9	FI_10	FI_11	FI_12	FI_13	FI_14	FI_15	FI_16	FI_17	FI_18	FI_19	FI_20	FI_21	FI_22	FI_23	FI_24	FI_25	FI_26	FI_27	FI_28	FI_29	FI_30	FI_31	FI_32	FI_33	FI_34	FI_35	FI_36	FI_37
3079	1	1	0	0.01	0.01	0.01	0.01	0.01	0.03	0.05	0.05	0.05	0.09	0.09	0.11	0.11	0.09	0.07	0.15	0.17	0.17	0.17	0.16	0.18	0.18	0.18	0.35	0.37	0.37	0.37	0.37	0.37	0.39	0.39	0.39	0.39	0.37	0.39	0.69
3043	1	1	0	0	0	0.13	0.14	0.15	0.17	0.27	0.27	0.27	0.27	0.29	0.49	0.46	0.48	0.5	0.5	0.5	0.52	0.52	0.52	0.76	0.76	0.76	0.76	0.78	1	1	1	1.02	1.02	1.02	1.02	1.04	1.11	1.11	1.33
3051	1	1	0	0.08	0.09	0.09	0.09	0.11	0.2	0.2	0.2	0.22	0.27	0.27	0.29	0.29	0.36	0.36	0.38	0.38	0.38	0.39	0.4	0.4	0.54	0.54	0.56	0.56	0.56	0.56	0.58	0.58	0.74	0.74	0.74	0.8	0.8	0.8	0.91
3067	1	1	0	0	0.02	0.02	0.02	0.09	0.09	0.09	0.11	0.23	0.24	0.27	0.27	0.29	0.37	0.37	0.37	0.4	0.4	0.45	0.45	0.45	0.46	0.6	0.62	0.64	0.64	0.64	0.73	0.73	0.73	0.75	0.91	0.91	0.91	0.92	1.07
3031	1	1	0	0	0.09	0.11	0.24	0.25	0.25	0.32	0.32	0.32	0.33	0.33	0.39	0.46	0.48	0.48	0.6	0.62	0.64	0.64	0.72	0.72	0.72	0.74	0.86	0.86	0.86	0.86	0.95	0.97	0.97	1.21	1.21	1.21	1.21	1.21	1.31
3091	1	1	0.05	0.04	0.04	0.05	0.04	0.04	0.1	0.19	0.14	0.2	0.19	0.22	0.35	0.33	0.35	0.35	0.32	0.35	0.36	0.36	0.36	0.38	0.58	0.58	0.6	0.6	0.6	0.6	0.89	0.89	0.86	0.91	0.9	1.07	1.08	1.08	1.47
3109	1	1	0.02	0.02	0	0.12	0.28	0.26	0.26	0.39	0.39	0.37	0.37	0.4	0.39	0.39	0.4	0.41	0.27	0.27	0.04	0.21	0.17	0.23	0.28	0.46	0.35	0.4	0.6	0.18	0.18	0.16	0.11	0.87	0.91	0.93	0.95	0.95	0.91
3117	1	1	0	0	0	0.04	0.04	0.04	0.04	0.1	0.38	0.38	0.38	0.38	0.4	0.4	0.4	0.43	0.43	0.43	0.43	0.43	0.57	0.6	0.6	0.62	0.62	0.62	0.62	0.82	0.82	0.82	0.84	0.85	0.85	1.06	1.06	1.04	1.2
3093	1	2	0.02	0	0	0	0.07	0.07	0.07	0.18	0.18	0.18	0.19	0.32	0.33	0.33	0.33	0.33	0.35	0.36	0.36	0.49	0.51	0.51	0.51	0.63	0.63	0.65	0.66	0.66	0.66	0.77	0.77	0.79	0.87	0.89	1.04	1.04	1.07
3049	1	2	0	0	0	0	0.09	0.09	0.11	0.11	0.11	0.31	0.33	0.33	0.48	0.48	0.49	0.47	0.5	0.5	0.5	0.5	0.5	0.73	0.75	0.75	0.75	0.91	0.94	0.94	0.94	0.96	0.96	0.97	0.97	1.12	1.1	1.11	1.19
3045	1	2	0	0	0	0	0.08	0.09	0.09	0.19	0.19	0.19	0.31	0.31	0.31	0.45	0.45	0.47	0.47	0.47	0.47	0.47	0.62	0.62	0.64	0.64	0.72	0.72	0.72	0.74	0.74	0.91	0.91	0.93	0.93	0.93	0.99	1.12	1.12
3071	1	2	0.09	0.13	0.13	0.14	0.19	0.2	0.2	0.2	0.2	0.33	0.4	0.4	0.48	0.49	0.49	0.51	0.51	0.51	0.53	0.55	0.67	0.67	0.67	0.69	0.81	0.81	0.83	0.83	0.93	0.95	0.95	1.04	1.04	1.06	1.14	1.14	1.24
3085	1	2	0	0	0.08	0.06	0.13	0.2	0.28	0.38	0.41	0.43	0.57	0.57	0.59	0.59	0.57	0.74	0.74	0.76	0.76	0.76	0.76	0.86	0.86	0.86	0.86	0.93	1.04	1.04	1.04	1.04	1.04	1.11	1.21	1.21	1.21	1.24	1.44
3103	1	2	0	0	0	0	0	0	0	0	0	0.15	0.17	0.18	0.18	0.3	0.3	0.32	0.42	0.41	0.43	0.45	0.46	0.45	0.45	0.59	0.6	0.62	0.62	0.64	0.62	0.6	0.59	0.78	0.79	0.81	0.81	0.83	1.03
3105	1	2	0	0	0	0	0	0	0	0	0.09	0.09	0.09	0.11	0.11	0.16	0.16	0.23	0.23	0.23	0.23	0.23	0.23	0.23	0.23	0.38	0.38	0.38	0.38	0.38	0.38	0.38	0.4	0.4	0.61	0.61	0.61	0.61	0.61
3113	1	2	0	0.07	0.06	0.05	0.04	0.2	0.2	0.2	0.2	0.26	0.3	0.3	0.3	0.5	0.5	0.52	0.52	0.5	0.5	0.5	0.5	0.57	0.57	0.57	0.64	0.66	0.66	0.66	0.65	0.68	0.74	0.74	0.74	0.85	0.87	0.91	0.97
#Genotype: 1 = WT
*Treatment: 1 = Vehicle; 2 = CORT

## Sheet: Fig 3F
ID	Genotype#	Treatment *	FI_1	FI_2	FI_3	FI_4	FI_5	FI_6	FI_7	FI_8	FI_9	FI_10	FI_11	FI_12	FI_13	FI_14	FI_15	FI_16	FI_17	FI_18	FI_19	FI_20	FI_21	FI_22	FI_23	FI_24	FI_25	FI_26	FI_27	FI_28	FI_29	FI_30	FI_31	FI_32	FI_33	FI_34	FI_35	FI_36	FI_37
2957	2	1	0	0.04	0.04	0.04	0.05	0.05	0.23	0.25	0.25	0.25	0.31	0.4	0.4	0.4	0.4	0.46	0.51	0.51	0.6	0.63	0.63	0.63	0.69	0.69	0.69	0.87	0.87	0.87	0.87	0.87	0.96	0.96	0.96	0.96	1.08	1.08	1.12
3007	2	1	0	0	0	0	0	0	0	0	0.03	0.09	0.11	0.11	0.11	0.15	0.15	0.15	0.18	0.18	0.18	0.18	0.2	0.2	0.2	0.21	0.26	0.37	0.37	0.37	0.37	0.37	0.39	0.39	0.4	0.55	0.55	0.53	0.53
3029	2	1	0	0	0	0	0	0	0	0	0.12	0.15	0.15	0.15	0.17	0.18	0.18	0.13	0.18	0.2	0.2	0.22	0.23	0.37	0.37	0.39	0.4	0.4	0.54	0.56	0.56	0.56	0.58	0.58	0.6	0.89	0.89	0.91	0.91
3039	2	1	0	0.05	0.07	0.07	0.07	0.07	0.07	0.11	0.11	0.09	0.09	0.11	0.18	0.16	0.14	0.07	0.2	0.25	0.27	0.27	0.27	0.3	0.32	0.35	0.52	0.54	0.53	0.53	0.51	0.51	0.54	0.56	0.56	0.56	0.56	0.74	0.94
3061	2	1	0	0.02	0.02	0.02	0.02	0.05	0.07	0.13	0.13	0.3	0.34	0.4	0.42	0.42	0.43	0.43	0.47	0.47	0.49	0.7	0.7	0.68	0.68	0.79	0.81	0.81	0.98	0.98	0.98	0.98	0.98	1.17	1.17	1.21	1.37	1.37	1.48
3097	2	1	0	0	0	0.18	0.18	0.18	0.18	0.18	0.25	0.25	0.27	0.27	0.27	0.37	0.37	0.37	0.22	0.41	0.46	0.46	0.46	0.46	0.46	0.48	0.48	0.48	0.48	0.49	0.49	0.51	0.61	0.61	0.63	0.63	0.63	0.74	0.74
3125	2	1	0.02	0.02	0.02	0.02	0.02	0.12	0.12	0.12	0.12	0.14	0.14	0.15	0.15	0.15	0.15	0.14	0.15	0.14	0.16	0.17	0.18	0.18	0.2	0.2	0.2	0.13	0.22	0.23	0.23	0.25	0.25	0.27	0.32	0.33	0.33	0.35	0.56
3129	2	1	0	0.06	0.06	0.14	0.14	0.14	0.14	0.21	0.21	0.27	0.29	0.29	0.54	0.6	0.6	0.62	0.62	0.64	0.64	0.64	0.64	0.64	0.64	0.74	0.74	0.74	0.74	0.76	0.76	0.76	0.78	0.91	0.91	0.91	1.05	1.05	1.28
3037	2	2	0.13	0.27	0.29	0.47	0.48	0.46	0.54	0.54	0.54	0.67	0.67	0.89	0.91	0.91	0.97	0.94	0.94	1.09	1.11	1.11	1.22	1.2	1.2	1.45	1.47	1.49	1.49	1.49	1.58	1.58	1.58	1.76	1.76	1.76	1.76	1.76	1.92
3057	2	2	0.02	0.04	0.05	0.05	0.05	0.04	0.2	0.17	0.21	0.22	0.23	0.28	0.37	0.37	0.35	0.35	0.36	0.36	0.5	0.5	0.5	0.5	0.5	0.52	0.76	0.78	0.78	0.78	0.76	0.76	0.76	0.86	0.86	0.86	0.86	0.93	1.12
3065	2	2	0	0	0	0	0	0	0	0.07	0.12	0.14	0.29	0.33	0.33	0.33	0.51	0.57	0.57	0.59	0.69	0.69	0.71	0.72	0.81	0.81	0.83	0.83	0.85	0.97	0.99	0.99	1.09	1.09	1.09	1.26	1.26	1.28	1.45
3083	2	2	0.06	0.07	0.07	0.14	0.14	0.14	0.15	0.24	0.24	0.25	0.27	0.27	0.38	0.26	0.23	0.23	0.35	0.35	0.36	0.36	0.36	0.32	0.32	0.32	0.51	0.51	0.51	0.53	0.53	0.65	0.65	0.66	0.66	0.72	0.72	0.74	0.74
3115	2	2	0.02	0.11	0.12	0.36	0.3	0.34	0.34	0.45	0.51	0.6	0.84	0.84	0.92	0.92	0.94	0.94	1.04	1.04	1.11	1.17	1.23	1.23	1.36	1.36	1.39	1.39	1.5	1.48	1.44	1.43	1.66	1.66	1.66	1.71	1.69	1.88	2.01
3121	2	2	0	0	0	0	0.12	0.35	0.35	0.35	0.36	0.36	0.36	0.36	0.4	0.4	0.4	0.4	0.4	0.42	0.42	0.43	0.67	0.67	0.67	0.67	0.69	0.69	0.83	0.83	0.83	0.83	0.83	0.85	0.85	1.04	1.06	1.06	1.06
3127	2	2	0.09	0.1	0.1	0.07	0.1	0.1	0.24	0.25	0.24	0.26	0.27	0.3	0.29	0.46	0.46	0.4	0.48	0.48	0.48	0.48	0.48	0.59	0.59	0.59	0.6	0.6	0.62	0.62	0.82	0.89	0.87	0.87	0.87	0.89	0.91	0.91	1.14
#Genotype: 2 = HOM
*Treatment: 1 = Vehicle; 2 = CORT

## Sheet: Fig 3 Suppl 1A
ID	Genotype #	Treatment *	RER_01	RER_02	RER_03	RER_04	RER_05	RER_06	RER_07	RER_08	RER_09	RER_10	RER_11	RER_12	RER_13	RER_14	RER_15	RER_16	RER_17	RER_18	RER_19	RER_20	RER_21	RER_22	RER_23	RER_24	RER_25	RER_26	RER_27	RER_28	RER_29	RER_30	RER_31	RER_32	RER_33	RER_34	RER_35	RER_36	RER_37	RER_38	RER_39	RER_40	RER_41	RER_42	RER_43	RER_44	RER_45	RER_46	RER_47
1473	1	1	Sensor malfunction
1483	1	1	Sensor malfunction
1509	1	1	0.795467	0.782666	0.706575	0.745385	0.725054	0.810994	0.843614	0.860189	0.853666	0.876535	0.868847	0.882825	0.893811	0.893106	0.891509	0.934823	0.889837	0.851499	0.832331	0.825399	0.870745	0.854898	0.808099	0.865343	0.883847	0.853072	0.862687	0.885565	0.847447	0.831391	0.836959	0.879789	0.848266	0.782485	0.824734	0.754726	0.793943	0.869961	0.880416	0.914525	0.883066	0.800867	0.807799	0.804655	0.793093	0.804433	0.876481
1526	1	1	0.848753	0.77774	0.883294	0.830817	0.869897	0.855678	0.851939	0.797834	0.851683	0.851515	0.878547	0.848789	0.84882	0.859128	0.851258	0.9156	0.895709	0.840428	0.877092	0.813925	0.847802	0.867019	0.8818	0.90433	0.893179	0.878283	0.910976	0.870914	0.884077	0.852364	0.808107	0.829835	0.788566	0.834259	0.867941	0.873825	0.884042	0.892127	0.812356	0.827845	0.751928	0.806466	0.86132	0.792608	0.826372	0.766161	0.825348
1471	1	1	0.887638	0.895448	0.905361	0.844378	0.901829	0.911763	0.953152	0.916729	0.951576	0.914776	0.97508	0.917966	0.899245	0.944788	0.921916	0.989449	1.00328	1.00235	0.948672	0.980472	0.929171	0.977011	0.974434	0.940548	0.890006	0.923282	0.986367	0.966844	0.964226	0.921518	0.91356	1.01944	0.929435	0.928724	0.870321	0.920054	0.955447	0.928805	0.916181	0.911678	0.965049	0.9556	0.948727	0.901027	0.842546	0.826282	0.855085
1540	1	1	0.804752	0.875004	0.837882	0.761181	0.828297	0.903503	0.933234	0.889064	0.95282	0.934961	0.910919	0.898629	0.902525	0.89247	0.930534	0.908379	0.934894	0.939173	0.923824	0.970374	0.908699	0.927247	0.914196	0.92778	0.927313	0.868421	0.932173	0.909611	0.931931	0.895959	0.898443	0.932941	0.908226	0.927024	0.910284	0.887471	0.917659	0.905582	0.925895	0.92974	0.898596	0.950344	0.908315	0.902941	0.911286	0.886707	0.896915
1553	1	1	0.831456	0.771828	0.77841	0.73465	0.853805	0.811406	0.885039	0.904103	0.923921	0.912	0.92801	0.927463	0.939141	0.919066	0.931921	0.93859	0.89899	0.913726	0.911866	0.954925	0.961936	0.961982	0.925818	0.952188	0.940728	0.917159	0.956715	0.931753	0.899482	0.850212	0.855153	0.905229	0.909769	0.937944	0.887619	0.88284	0.938055	0.899879	0.899196	0.881519	0.8471	0.895783	0.906407	0.873377	0.832998	0.757869	0.812114
1302	1	1	0.857051	0.918834	0.921478	0.924502	0.892395	0.918476	0.914624	0.966153	0.912483	0.959259	0.943101	0.952104	0.927014	0.934116	1.01458	0.941356	0.93968	0.883651	0.926348	0.96702	0.938517	0.905552	0.969368	0.938857	0.948174	0.911706	0.890584	0.938822	0.932739	0.894586	0.887379	0.917271	0.905858	0.891513	0.861342	0.895076	0.912264	0.899716	0.900722	0.90636	0.906031	0.905212	0.943574	0.935839	0.811908	0.828299	0.790628
1324	1	1	0.81297	0.905796	0.929827	0.919113	0.909982	0.936313	0.950696	0.984307	0.875251	0.963777	0.944089	0.961294	0.952375	0.948743	0.998912	0.962148	0.906914	0.987166	0.965117	0.945962	0.951396	0.916394	0.933743	0.93745	0.948851	0.913812	0.943856	0.905468	0.863619	0.942525	0.924242	0.939405	0.905779	0.933897	0.927892	0.940577	0.913079	0.894163	0.91305	0.897521	0.913305	0.878113	0.916981	0.91823	0.911133	0.845839	0.912089
1338	1	1	0.758169	0.855695	0.89059	0.895422	0.877995	0.929377	0.924724	0.921893	0.904334	0.913583	0.921551	0.930389	0.889109	0.939817	0.977993	0.912572	0.939654	0.915778	0.937947	0.941534	0.927577	0.908522	0.921108	0.976516	0.937095	0.92088	0.948053	0.979226	0.938712	0.951957	0.941093	0.945489	0.894953	0.904432	0.945763	0.933835	0.916256	0.906829	0.920359	0.896583	0.918029	0.915014	0.931854	0.886495	0.846611	0.837154	0.806417
1475	1	2	Sensor malfunction
1495	1	2	0.847417	0.767325	0.831858	0.816381	0.811297	0.880629	0.868294	0.827672	0.7878	0.884262	0.884643	0.864227	0.849786	0.818867	0.772758	0.895336	0.886842	0.873242	0.811449	0.824348	0.844284	0.929289	0.895653	0.902899	0.937628	0.87925	0.892838	0.860394	0.869728	0.927851	0.818894	0.853933	0.905423	0.879288	0.91855	0.912697	0.939463	0.870723	0.828974	0.925614	0.879406	0.890848	0.882672	0.884814	0.898727	0.854061	0.838082
1534	1	2	0.788732	0.72549	0.759986	0.877851	0.841168	0.898889	0.879234	0.891811	0.902296	0.9441	0.946545	0.912497	0.904311	0.90105	0.909616	0.941443	0.888462	0.891758	0.939762	0.897678	0.873394	0.926416	0.883663	0.893512	0.835527	0.902072	0.901365	0.898412	0.903607	0.895825	0.831654	0.887804	0.924825	0.87532	0.891884	0.879933	0.897926	0.961604	0.888593	0.896958	0.801036	0.920692	0.917465	0.899206	0.912836	0.887401	0.882453
1538	1	2	0.785106	0.783808	0.802494	0.771532	0.859422	0.92848	0.919562	0.886391	0.919353	0.900145	0.904571	0.90367	0.848423	0.847584	0.905342	0.893778	0.940774	0.952576	0.92023	0.929406	0.929474	0.961466	0.930898	0.897563	0.942725	0.894537	0.958205	0.943891	0.925656	0.906173	0.929034	0.942382	0.934291	0.942246	0.949694	0.928392	0.912952	0.921914	0.926651	0.966232	0.917506	0.923615	0.940816	0.918311	0.87279	0.896419	0.917207
1544	1	2	0.762001	0.815444	0.798017	0.840919	0.887521	0.889109	0.914511	0.88378	0.910766	0.910485	0.889337	0.896238	0.893583	0.88395	0.924276	0.884179	0.921545	0.90818	0.895321	0.918423	0.931913	0.918212	0.92793	0.955325	0.916142	0.884434	0.924272	0.894631	0.881187	0.904454	0.89047	0.907177	0.923476	0.94448	0.921711	0.890168	0.961147	0.905815	0.888552	0.90787	0.871811	0.907462	0.895108	0.840955	0.872189	0.870251	0.870298
1306	1	2	0.887063	0.953987	0.893881	0.908752	0.895613	0.925997	0.916016	0.943016	0.892667	0.949504	0.945102	0.938878	0.908367	0.925959	0.946662	0.958857	0.933959	0.956981	0.944314	0.958169	0.964494	0.91026	0.926163	1.00601	0.963709	0.964831	0.961837	0.931352	0.956254	0.998483	0.949774	0.978551	0.936367	0.967465	0.932782	0.945057	0.938866	0.931613	0.937042	0.909835	0.932881	0.936291	0.96146	0.927915	0.919359	0.961887	0.94037
1313	1	2	0.835062	0.894624	0.942847	0.948099	0.919156	0.973458	0.884347	1.02508	0.951153	1.0329	0.988302	0.999608	0.988988	1.01349	0.99941	0.94023	0.915347	1.03324	1.0889	1.02866	0.98261	0.927084	0.993662	0.98681	1.00057	1.05578	1.02498	1.02886	1.05169	1.03912	1.05704	1.02323	1.01996	1.02033	1.04073	1.00831	1.00051	0.991975	0.982059	0.957185	1.02572	1.00016	1.10576	1.08109	1.02279	1.00607	0.974947
1341	1	2	0.886228	0.907726	0.899705	0.892223	0.892275	0.918666	0.90933	0.931358	0.90788	0.940945	0.925967	0.924305	0.929647	0.921474	0.928049	0.914305	0.874671	0.942584	0.922575	0.963895	0.929028	0.939048	0.922838	0.950527	0.922505	0.902904	0.913594	0.948549	0.924632	0.937264	0.965378	0.975092	0.940341	0.923975	0.952288	0.942535	0.950193	0.935536	0.901417	0.888855	0.914819	0.885858	0.955882	0.904892	0.945348	0.966765	0.894254
1349	1	2	0.871032	0.897012	0.901497	0.915707	0.871923	0.934141	0.906123	0.916739	0.915898	0.925569	0.917265	0.90164	0.906633	0.897521	0.920019	0.92832	0.939102	0.987722	0.947226	0.936276	0.937386	0.902333	0.916589	0.933274	0.967188	0.920428	0.921728	0.969472	0.985421	0.965635	0.937199	0.944215	0.966506	0.959403	0.945706	0.935731	0.935091	0.934483	0.949104	0.943365	0.945432	0.97484	0.95881	0.954495	0.912823	0.937715	0.915593
#Genotype: 1 = WT
*Treatment: 1 = Vehicle; 2 = CORT
[truncated: 109 more columns]

## Sheet: Fig 3 Suppl 1B
ID	Genotype #	Treatment *	RER_01	RER_02	RER_03	RER_04	RER_05	RER_06	RER_07	RER_08	RER_09	RER_10	RER_11	RER_12	RER_13	RER_14	RER_15	RER_16	RER_17	RER_18	RER_19	RER_20	RER_21	RER_22	RER_23	RER_24	RER_25	RER_26	RER_27	RER_28	RER_29	RER_30	RER_31	RER_32	RER_33	RER_34	RER_35	RER_36	RER_37	RER_38	RER_39	RER_40	RER_41	RER_42	RER_43	RER_44	RER_45	RER_46	RER_47
1476	2	1	Sensor malfunction
1490	2	1	Sensor malfunction
1496	2	1	0.868394	0.816856	0.847049	0.88949	0.896589	0.853363	0.890409	0.915759	0.928963	0.885002	0.870288	0.929371	0.883622	0.86971	0.962823	0.957305	0.891166	0.930265	0.938085	0.88102	0.881894	0.930261	0.975985	0.94496	0.911084	0.863456	0.920222	0.936359	0.897552	0.898957	0.939653	0.949229	0.911783	0.874773	0.917349	0.968996	0.949341	0.884231	0.864163	0.890164	0.924142	0.89084	0.849224	0.840107	0.824983	0.793515	0.736499
1527	2	1	0.871739	0.749645	0.799894	0.79832	0.833892	0.901428	0.881718	0.881309	0.903111	0.926282	0.903639	0.889711	0.818273	0.812121	0.894187	0.93863	0.904511	0.906883	0.883011	0.893081	0.848691	0.875418	0.912594	0.886683	0.940536	0.902092	0.895243	0.932107	0.930645	0.900491	0.869108	0.898399	0.912004	0.913575	0.937589	0.898432	0.928194	0.925721	0.889219	0.918735	0.89955	0.913064	0.920313	0.871019	0.824486	0.804491	0.761201
1552	2	1	0.801403	0.774181	0.761562	0.719134	0.859842	0.872425	0.896945	0.86622	0.950114	0.898625	0.902445	0.904983	0.881514	0.884907	0.869756	0.897464	0.9274	0.927177	0.897034	0.899543	0.893158	0.920499	0.94331	0.913367	0.934719	0.897995	0.916706	0.924362	0.901149	0.916807	0.901341	0.897343	0.895688	0.941887	0.914645	0.889249	0.946929	0.916433	0.922454	0.942322	0.897947	0.924481	0.90571	0.89076	0.847889	0.838591	0.844017
1556	2	1	0.844479	0.763584	0.782991	0.715627	0.750403	0.862885	0.88723	0.855283	0.889243	0.90431	0.927109	0.903225	0.905882	0.878348	0.897616	0.915511	0.951075	0.913515	0.907173	0.927169	0.910914	0.927556	0.844666	0.921753	0.917277	0.87262	0.963436	0.918574	0.894174	0.881529	0.945297	0.937823	0.939521	0.94286	0.949898	0.897707	0.930245	0.908711	0.905666	0.944775	0.904719	0.953527	0.918778	0.893235	0.901333	0.884847	0.902392
1276	2	1	0.745737	0.768582	0.876308	0.895744	0.856874	0.931458	0.918801	0.931566	0.908159	0.926512	0.971377	0.920589	0.895948	0.908923	0.967903	0.92216	0.900765	0.901524	0.888657	0.880751	0.818595	0.790691	0.810811	0.873129	0.892038	0.901456	0.861698	0.886	0.870382	0.91465	0.916306	0.914801	0.926585	0.909534	0.928708	0.913166	0.935863	0.895223	0.927518	0.869971	0.887076	0.87443	0.951814	0.866787	0.88352	0.829534	0.802391
1286	2	1	0.889011	0.95528	0.966573	0.971816	0.937481	0.9364	0.922898	0.987206	0.969065	1.00671	1.01088	0.988495	0.971263	1.00925	0.987381	0.979772	1.04375	1.01761	0.982441	0.980651	0.971036	0.92934	0.969464	0.990869	0.996844	0.967722	0.971646	1.01422	1.02214	0.983768	0.979011	0.981121	0.944327	1.02875	0.967883	1.00215	0.979137	0.950191	0.940881	0.908681	0.967468	0.935397	1.01268	0.901506	0.862743	0.910149	0.913825
1299	2	1	0.848577	0.871679	0.915742	0.920462	0.888925	0.905018	0.92498	0.953888	0.910059	0.93752	0.95524	0.938264	0.932374	0.963898	0.916617	0.958171	0.90269	0.99306	0.939306	0.951429	0.965782	0.932005	0.940148	0.962234	0.947929	0.914597	0.933424	0.92838	0.960823	0.946207	0.925944	0.935805	0.930469	0.907361	0.935151	0.952168	0.918486	0.919481	0.902296	0.904404	0.857007	0.849235	0.899529	0.866644	0.838089	0.82784	0.808736
1337	2	1	0.839147	0.787587	0.873753	0.890547	0.841737	0.916188	0.859771	0.991817	0.923671	0.916439	0.906905	0.923012	0.926928	0.927439	0.990938	0.927547	0.882549	0.957549	0.929084	0.959167	0.919221	0.882398	0.934111	0.9631	0.941294	0.897198	0.937052	0.961819	0.921105	0.917445	0.917671	0.906158	0.892394	0.905529	0.920557	0.915259	0.956298	0.896046	0.904859	0.913961	0.919749	0.870477	0.938643	0.905916	0.912141	0.906433	0.894113
1474	2	2	Sensor malfunction
1482	2	2	Sensor malfunction
1491	2	2	0.877668	0.862295	0.900096	0.836678	0.879435	0.942377	0.919205	0.892335	0.896433	0.933355	0.940486	0.925638	0.947654	0.914114	0.875617	0.963179	0.907896	0.919319	0.900219	0.899512	0.936677	0.945191	0.922719	0.925063	0.954414	0.930916	0.936326	0.946978	0.968022	0.932165	0.932801	0.913883	0.925272	0.903696	0.936989	0.879895	0.970998	0.918053	0.92649	0.949229	0.906338	0.81855	0.876024	0.862129	0.856073	0.798643	0.87878
1541	2	2	0.869019	0.748426	0.779097	0.888918	0.858864	0.890432	0.890698	0.930569	0.913555	0.910932	0.925754	0.918231	0.937095	0.935303	0.921014	0.97275	0.909738	0.847997	0.952293	0.865118	0.875607	0.918177	0.939556	0.913923	0.923419	0.908818	0.961279	0.926509	0.959711	0.926744	0.909513	0.970318	0.988573	0.919482	0.95826	0.909443	0.951048	0.959806	0.918992	0.913163	0.857258	0.859424	0.953367	0.958363	0.922996	0.897594	0.905666
1546	2	2	0.789408	0.711813	0.816674	0.77529	0.822081	0.879877	0.896875	0.889381	0.898619	0.905483	0.926987	0.915707	0.88624	0.889422	0.884413	0.877254	0.933298	0.930161	0.912526	0.942387	0.932949	0.960321	0.892638	0.921123	0.892054	0.863935	0.92556	0.884478	0.901302	0.879137	0.891984	0.924384	0.951739	0.93211	0.906424	0.90156	0.93666	0.913565	0.922924	0.911802	0.952762	0.949691	0.90515	0.903548	0.874777	0.896932	0.940476
1554	2	2	0.83396	0.889828	0.823629	0.720826	0.761235	0.808864	0.895153	0.929786	0.944842	0.924335	0.92672	0.924307	0.910569	0.90278	0.929128	0.900634	0.954346	0.913352	0.906012	0.943235	0.911165	0.942163	0.921037	0.86991	0.933208	0.903533	0.93826	0.9183	0.907456	0.911344	0.919529	0.941665	0.933969	0.941306	0.935383	0.886099	0.972794	0.933918	0.980073	0.975436	0.941756	0.943599	0.873733	0.870378	0.895456	0.859183	0.908698
1557	2	2	0.798131	0.689878	0.742243	0.694335	0.821745	0.824479	0.889675	0.882355	0.915041	0.889244	0.88653	0.904513	0.891697	0.891326	0.888474	0.869363	0.923635	0.917992	0.919381	0.92731	0.898554	0.932409	0.913134	0.904264	0.903789	0.891371	0.944401	0.907662	0.884092	0.880069	0.934106	0.928152	0.951432	0.959604	0.922179	0.87872	0.943742	0.929448	0.885982	0.881163	0.859342	0.897799	0.879195	0.911233	0.895111	0.821514	0.872753
1279	2	2	0.730383	0.825632	0.840802	0.835757	0.867725	0.875603	0.865657	0.904263	0.888447	0.910893	0.908212	0.899015	0.87451	0.898667	0.899828	0.869129	0.933209	0.88889	0.892371	0.91803	0.922194	0.876815	0.89695	0.871969	0.899236	0.873037	0.900607	0.942308	0.93636	0.862084	0.890728	0.915915	0.894579	0.90472	0.924094	0.931055	0.905124	0.900781	0.925234	0.918287	0.922601	0.954473	0.947303	0.955473	0.942171	0.962445	0.917525
1291	2	2	0.89658	0.951873	0.959117	0.962973	0.927794	0.976072	0.951809	0.987633	0.929983	0.991679	0.955263	0.959644	0.962432	0.966247	0.986791	0.984674	0.914707	0.982672	0.984868	0.987378	1.00781	0.956747	0.936956	0.994525	0.967099	0.900379	0.885771	1.0043	1.00988	1.03928	0.996752	0.960757	0.929348	0.999445	0.967686	0.974644	0.950251	0.941219	0.96737	0.929627	0.993159	0.926906	0.967225	0.963444	0.938011	0.954674	0.899988
1321	2	2	0.861171	0.874999	0.932375	0.929482	0.923148	0.908567	0.929097	0.928806	0.951392	0.933345	0.959169	0.976531	0.939262	0.956811	0.997397	0.957972	0.924245	0.977172	0.9471	0.958513	0.976598	0.993025	0.953801	0.943067	0.957888	0.946158	0.966456	0.977935	0.983397	0.99039	0.976156	0.987625	0.960908	0.933436	0.978957	0.979865	0.964449	0.931713	0.983679	0.947187	0.994346	0.963714	0.99582	0.952999	0.95161	0.985159	0.945083
1340	2	2	0.860188	0.894338	0.88748	0.894674	0.875553	0.891398	0.878142	0.89593	0.884855	0.89221	0.903341	0.889932	0.870948	0.895222	0.895842	0.875719	0.873707	0.929094	0.867878	0.909601	0.905387	0.899776	0.901289	0.863976	0.922063	0.909323	0.910423	0.94647	0.925292	0.912208	0.923684	0.937904	0.929953	0.92038	0.914732	0.94247	0.908465	0.940959	0.919002	0.883394	1.00483	0.921543	0.962891	0.953315	0.931866	0.945885	0.927623
#Genotype: 2 = HOM
*Treatment: 1 = Vehicle; 2 = CORT
[truncated: 109 more columns]

## Sheet: Fig 3 Suppl 1C
ID	Genotype #	Treatment *	BW_Baseline	TEE_01	TEE_02	TEE_03	TEE_04	TEE_05	TEE_06	TEE_07	TEE_08	TEE_09	TEE_10	TEE_11	TEE_12	TEE_13	TEE_14	TEE_15	TEE_16	TEE_17	TEE_18	TEE_19	TEE_20	TEE_21	TEE_22	TEE_23	TEE_24	TEE_25	TEE_26	TEE_27	TEE_28	TEE_29	TEE_30	TEE_31	TEE_32	TEE_33	TEE_34	TEE_35	TEE_36	TEE_37	TEE_38	TEE_39	TEE_40	TEE_41	TEE_42	TEE_43	TEE_44	TEE_45	TEE_46
1473	1	1	Sensor malfunction
1483	1	1	Sensor malfunction
1509	1	1	35.87	0.49043	0.415341	0.367935	0.52385	0.401829	0.668717	0.602343	0.621337	0.62021	0.606202	0.593104	0.623342	0.587396	0.583349	0.587321	0.454932	0.544352	0.453769	0.334086	0.395269	0.529986	0.375216	0.492978	0.58607	0.598828	0.482646	0.302938	0.362221	0.365012	0.494418	0.416701	0.378161	0.419215	0.411074	0.382844	0.352906	0.587542	0.640979	0.614037	0.50989	0.478522	0.298446	0.329239	0.351197	0.358165	0.420396
1526	1	1	27.6	0.400397	0.373762	0.445402	0.570175	0.593447	0.574938	0.65142	0.606269	0.602929	0.635747	0.437071	0.272939	0.412782	0.297061	0.366011	0.556368	0.596637	0.359207	0.249432	0.321889	0.293395	0.34884	0.544233	0.577158	0.323394	0.311345	0.349222	0.330022	0.551925	0.614543	0.341177	0.337035	0.328804	0.385734	0.268924	0.389661	0.554577	0.483336	0.262826	0.268061	0.318865	0.30507	0.291378	0.339605	0.280271	0.279052
1471	1	1	31.12	0.501607	0.446095	0.36566	0.412471	0.60306	0.582157	0.567812	0.56556	0.562054	0.514462	0.354989	0.29427	0.352942	0.347931	0.354592	0.345962	0.348448	0.575503	0.584324	0.53496	0.469526	0.607108	0.542234	0.496105	0.280082	0.45225	0.390223	0.353959	0.357291	0.515599	0.548305	0.515077	0.318659	0.373049	0.494585	0.616236	0.548184	0.338297	0.33635	0.469907	0.558686	0.533253	0.369768	0.349929	0.287909	0.302438
1540	1	1	28.39	0.478561	0.404385	0.357344	0.329607	0.482102	0.31288	0.357155	0.445362	0.432226	0.616382	0.473994	0.445817	0.329024	0.535694	0.667609	0.602917	0.318498	0.349285	0.415866	0.330142	0.377296	0.580059	0.627332	0.537227	0.339682	0.360387	0.423913	0.333062	0.329589	0.469489	0.419477	0.382232	0.401365	0.514474	0.586302	0.550216	0.293105	0.394652	0.495936	0.561916	0.492256	0.350743	0.29625	0.479772	0.332336	0.318926
1553	1	1	29.52	0.481814	0.337026	0.312395	0.4452	0.466388	0.386717	0.536907	0.355376	0.560352	0.528048	0.367392	0.34241	0.458464	0.402754	0.481109	0.626873	0.616329	0.571929	0.400089	0.393469	0.560118	0.557066	0.532794	0.331583	0.451781	0.635754	0.595241	0.576239	0.535273	0.287007	0.35012	0.438651	0.31973	0.447393	0.385824	0.647258	0.627532	0.588076	0.480133	0.27786	0.369129	0.526325	0.559528	0.470014	0.244836	0.285089
1302	1	1	29.99	0.528232	0.663528	0.650285	0.742019	0.647064	0.475759	0.54554	0.755429	0.682525	0.444967	0.612303	0.484234	0.47998	0.47177	0.564875	0.521134	0.722111	0.679664	0.667256	0.575482	0.478969	0.483245	0.665234	0.843219	0.715832	0.557462	0.573287	0.487793	0.575104	0.523121	0.670801	0.664586	0.610047	0.520834	0.481943	0.528523	0.469128	0.464002	0.644852	0.734476	0.623776	0.658139	0.38684	0.358612	0.389352	0.391477
1324	1	1	30.33	0.546769	0.44112	0.641034	0.660685	0.605629	0.606814	0.570573	0.438479	0.481824	0.407514	0.446696	0.432726	0.495003	0.412243	0.383692	0.601502	0.462967	0.447528	0.68051	0.662701	0.604039	0.639654	0.619758	0.615402	0.61688	0.413598	0.387521	0.405426	0.487269	0.559917	0.41963	0.546581	0.632178	0.46081	0.419177	0.60531	0.623518	0.578208	0.536279	0.358089	0.448179	0.455739	0.569535	0.368102	0.333988	0.383192
1338	1	1	26.24	0.757993	0.595751	0.654012	0.551867	0.62553	0.677214	0.690768	0.641734	0.586292	0.610355	0.660531	0.669855	0.499937	0.471458	0.443681	0.643846	0.681559	0.711756	0.66787	0.660588	0.615634	0.650686	0.510883	0.438123	0.426178	0.506851	0.578521	0.739534	0.677353	0.60759	0.500016	0.485126	0.542736	0.475266	0.703143	0.653428	0.640999	0.57332	0.42314	0.423018	0.573042	0.421675	0.410239	0.371802	0.423313	0.406396
1475	1	2	Sensor malfunction
1495	1	2	26.92	0.428337	0.306447	0.444814	0.356258	0.497255	0.495752	0.521151	0.356333	0.289281	0.498173	0.532901	0.47107	0.331683	0.283206	0.282117	0.521533	0.533922	0.422053	0.313447	0.312723	0.329138	0.528413	0.544077	0.498443	0.527133	0.494023	0.285778	0.271003	0.272286	0.458051	0.276932	0.334364	0.513788	0.555198	0.557162	0.353315	0.274661	0.290604	0.298918	0.539812	0.563209	0.51585	0.403794	0.237892	0.263906	0.27813
1534	1	2	30.13	0.458033	0.348878	0.452324	0.446908	0.558489	0.553477	0.401658	0.599858	0.618675	0.552798	0.588617	0.588014	0.588629	0.595619	0.545923	0.545599	0.506078	0.546338	0.58747	0.549057	0.540509	0.580885	0.371731	0.370601	0.322335	0.37842	0.363536	0.407465	0.523658	0.359524	0.432953	0.369203	0.508564	0.384071	0.481656	0.380424	0.350827	0.511404	0.53225	0.318599	0.352451	0.438405	0.320086	0.331525	0.481001	0.328675
1538	1	2	27.66	0.48931	0.318504	0.349624	0.485569	0.459919	0.581589	0.571247	0.644483	0.620918	0.578923	0.545679	0.501016	0.347159	0.341129	0.637904	0.524274	0.336402	0.338534	0.593447	0.54394	0.334562	0.32285	0.338504	0.407065	0.586979	0.435649	0.327058	0.534619	0.363786	0.351064	0.506083	0.348503	0.394492	0.562336	0.334193	0.325346	0.431804	0.511361	0.505943	0.297046	0.307231	0.336017	0.452099	0.394814	0.268904	0.310414
1544	1	2	29.77	0.499119	0.45283	0.526238	0.52796	0.544056	0.453517	0.470635	0.57606	0.566543	0.602512	0.489457	0.491593	0.510421	0.54184	0.5851	0.574769	0.492706	0.480412	0.561245	0.502763	0.506038	0.472761	0.482249	0.625046	0.579274	0.576473	0.43511	0.577358	0.557112	0.577234	0.422668	0.511419	0.565507	0.540976	0.432117	0.469817	0.385885	0.54568	0.485157	0.481912	0.495544	0.49422	0.395615	0.470451	0.336637	0.369131
1306	1	2	25	0.582173	0.612392	0.458161	0.589749	0.636895	0.546894	0.444221	0.56792	0.47486	0.575623	0.460077	0.652072	0.689882	0.55246	0.433391	0.548906	0.473316	0.623018	0.431724	0.48826	0.418188	0.415083	0.389048	0.335323	0.386631	0.493401	0.67329	0.53087	0.390316	0.444108	0.470035	0.378276	0.387382	0.533723	0.677753	0.726727	0.697024	0.682275	0.645039	0.553736	0.552197	0.347757	0.357652	0.384447	0.368353	0.371905
1313	1	2	32.02	0.472454	0.587446	0.34368	0.439483	0.488862	0.529313	0.391263	0.355105	0.38187	0.368627	0.400597	0.371895	0.389276	0.505494	0.519333	0.503809	0.353469	0.367879	0.322331	0.400846	0.470299	0.38125	0.582144	0.543381	0.323028	0.283524	0.342694	0.358105	0.320275	0.316293	0.33346	0.289816	0.360578	0.404331	0.411233	0.432959	0.37573	0.603365	0.548654	0.512701	0.296343	0.338199	0.321281	0.32642	0.298061	0.513583
1341	1	2	27.03	0.444186	0.514319	0.511804	0.501876	0.506045	0.507032	0.504037	0.356491	0.336158	0.537137	0.511156	0.509651	0.492257	0.506013	0.51389	0.464136	0.315495	0.289735	0.464793	0.333283	0.367823	0.54555	0.50536	0.501723	0.397362	0.308292	0.320105	0.275623	0.31117	0.419124	0.322621	0.465849	0.47101	0.348879	0.45236	0.439507	0.314834	0.482498	0.481653	0.291844	0.280257	0.308677	0.345047	0.401911	0.292303	0.274444
1349	1	2	25.45	0.543399	0.467201	0.551165	0.570417	0.439365	0.501005	0.559844	0.576298	0.563883	0.573973	0.609741	0.589901	0.57039	0.443893	0.422871	0.409452	0.377316	0.578744	0.612961	0.591816	0.553058	0.547013	0.375065	0.363249	0.53569	0.458123	0.363959	0.294566	0.613909	0.561294	0.574715	0.372746	0.420709	0.64486	0.633795	0.568461	0.485141	0.394571	0.329821	0.334265	0.319385	0.666292	0.457491	0.274983	0.305883	0.2951
#Genotype: 1 = WT
*Treatment: 1 = Vehicle; 2 = CORT
[truncated: 110 more columns]

## Sheet: Fig 3 Suppl 1D
ID	Genotype #	Treatment *	BW_Baseline	TEE_01	TEE_02	TEE_03	TEE_04	TEE_05	TEE_06	TEE_07	TEE_08	TEE_09	TEE_10	TEE_11	TEE_12	TEE_13	TEE_14	TEE_15	TEE_16	TEE_17	TEE_18	TEE_19	TEE_20	TEE_21	TEE_22	TEE_23	TEE_24	TEE_25	TEE_26	TEE_27	TEE_28	TEE_29	TEE_30	TEE_31	TEE_32	TEE_33	TEE_34	TEE_35	TEE_36	TEE_37	TEE_38	TEE_39	TEE_40	TEE_41	TEE_42	TEE_43	TEE_44	TEE_45	TEE_46
1476	2	1	Sensor malfunction
1490	2	1	Sensor malfunction
1496	2	1	24.09	0.404358	0.24874	0.295346	0.306976	0.424405	0.322501	0.34465	0.48001	0.411292	0.281034	0.300874	0.319636	0.318728	0.317958	0.481218	0.452812	0.444648	0.441937	0.431531	0.296539	0.299249	0.280065	0.41744	0.478665	0.464864	0.329581	0.287539	0.26159	0.263571	0.328805	0.445059	0.412239	0.269379	0.315809	0.326014	0.355438	0.366838	0.231647	0.32765	0.482973	0.42382	0.372011	0.22578	0.233436	0.230784	0.248386
1527	2	1	30.73	0.458651	0.293175	0.46913	0.566299	0.567332	0.603349	0.612603	0.559892	0.56886	0.554121	0.547539	0.415907	0.326657	0.332319	0.632623	0.553822	0.581832	0.530416	0.288451	0.324467	0.28546	0.379742	0.516123	0.436962	0.286794	0.471901	0.424494	0.531856	0.598044	0.416948	0.348052	0.352633	0.476069	0.376233	0.568843	0.579971	0.585991	0.553027	0.553849	0.504193	0.544931	0.456949	0.491359	0.290858	0.289972	0.282182
1552	2	1	33.85	0.467715	0.375754	0.368949	0.406919	0.521257	0.474619	0.563541	0.588036	0.330123	0.358163	0.322313	0.592784	0.573101	0.449337	0.345017	0.343006	0.337803	0.512724	0.538501	0.433927	0.37095	0.495619	0.362931	0.318046	0.486709	0.637795	0.560878	0.333642	0.377563	0.520975	0.642545	0.594959	0.377985	0.320271	0.36251	0.38149	0.579112	0.572499	0.364216	0.29965	0.375357	0.607101	0.595673	0.500868	0.280685	0.334096
1556	2	1	30.49	0.503257	0.340039	0.361971	0.433449	0.601012	0.37169	0.538524	0.578938	0.525493	0.413445	0.512924	0.627196	0.684563	0.621883	0.538113	0.347186	0.351099	0.499124	0.613606	0.495645	0.307658	0.350588	0.424627	0.589141	0.612751	0.461666	0.307649	0.437606	0.538223	0.385682	0.346987	0.480653	0.375517	0.340652	0.543139	0.61359	0.64337	0.562043	0.400747	0.39996	0.384982	0.321629	0.310924	0.311798	0.582671	0.578152
1276	2	1	29.52	0.402264	0.714299	0.481789	0.473757	0.712839	0.381172	0.346119	0.591355	0.705917	0.549591	0.330888	0.373913	0.393714	0.710661	0.648607	0.645402	0.491783	0.315131	0.36291	0.341209	0.321771	0.339007	0.586804	0.639797	0.369503	0.531861	0.427981	0.586631	0.511583	0.674958	0.649602	0.385234	0.587679	0.667194	0.719022	0.694709	0.684086	0.688095	0.604366	0.362613	0.544072	0.638259	0.392362	0.398	0.355578	0.389546
1286	2	1	30.44	0.401338	0.46499	0.335239	0.440348	0.548138	0.451803	0.300658	0.350119	0.454039	0.288802	0.313978	0.464653	0.364515	0.547827	0.539078	0.393291	0.314606	0.364481	0.461151	0.320322	0.416524	0.333423	0.373817	0.440478	0.490004	0.522683	0.446437	0.344373	0.286569	0.37887	0.401835	0.344114	0.419747	0.333716	0.509431	0.503258	0.343267	0.307932	0.30247	0.32875	0.511302	0.268839	0.277542	0.290275	0.312757	0.396469
1299	2	1	26.38	0.556677	0.378431	0.491805	0.506467	0.545895	0.422494	0.464988	0.569664	0.477152	0.355718	0.529022	0.482882	0.561141	0.529324	0.482102	0.312789	0.386664	0.509381	0.347577	0.517543	0.559057	0.372443	0.496672	0.44585	0.453201	0.369796	0.400641	0.439842	0.584707	0.504287	0.375867	0.485019	0.351633	0.376893	0.547522	0.349226	0.414577	0.599468	0.488666	0.45557	0.269306	0.287411	0.35592	0.273772	0.283842	0.289396
1337	2	1	27.7	0.512441	0.473907	0.57973	0.300644	0.512925	0.56545	0.515375	0.324388	0.353689	0.528386	0.515259	0.331981	0.351033	0.392797	0.546028	0.582199	0.414004	0.3391	0.503818	0.5758	0.554822	0.543934	0.319709	0.41235	0.372301	0.365422	0.496415	0.539294	0.364679	0.358604	0.557848	0.554164	0.591099	0.448674	0.349609	0.373107	0.542517	0.590936	0.569917	0.449584	0.311726	0.339711	0.334902	0.277248	0.317412	0.496798
1474	2	2	Sensor malfunction
1482	2	2	Sensor malfunction
1491	2	2	27.93	0.429877	0.251392	0.426153	0.466636	0.421699	0.429374	0.518939	0.479335	0.324248	0.483811	0.529402	0.507688	0.470246	0.331391	0.345535	0.477267	0.524611	0.404549	0.269586	0.267559	0.329239	0.46095	0.45608	0.283975	0.393047	0.371739	0.338436	0.410811	0.36794	0.425944	0.403822	0.382549	0.342351	0.396403	0.603344	0.532218	0.34472	0.308515	0.508754	0.538587	0.457821	0.267755	0.262395	0.249467	0.240827	0.260814
1541	2	2	29.42	0.3947	0.234195	0.461669	0.448583	0.49202	0.465086	0.354805	0.449468	0.559616	0.442435	0.341164	0.323125	0.500266	0.55559	0.57557	0.416401	0.520469	0.323535	0.449573	0.307331	0.321763	0.296702	0.495279	0.348971	0.34342	0.329417	0.364976	0.322357	0.356745	0.34358	0.457676	0.362463	0.511408	0.355615	0.53791	0.579441	0.536671	0.525288	0.453264	0.285879	0.284667	0.32927	0.522578	0.567663	0.451549	0.293018
1546	2	2	36.03	0.379556	0.253974	0.350038	0.473803	0.364937	0.462939	0.567568	0.561131	0.380981	0.579403	0.504624	0.308412	0.443392	0.560658	0.377586	0.419608	0.330979	0.339313	0.578703	0.568735	0.321319	0.290546	0.327897	0.580496	0.48402	0.384108	0.336257	0.542872	0.506686	0.390392	0.400295	0.472409	0.328522	0.405787	0.347553	0.467942	0.405902	0.377939	0.466137	0.547616	0.304543	0.333118	0.398732	0.353072	0.287363	0.292587
1554	2	2	26.7	0.462213	0.420229	0.284612	0.336099	0.330505	0.34172	0.328911	0.473154	0.341638	0.50916	0.522389	0.315206	0.465478	0.371995	0.368546	0.319801	0.357395	0.535034	0.541094	0.363305	0.334845	0.338898	0.518998	0.36755	0.47971	0.529265	0.326466	0.366153	0.365885	0.440192	0.314963	0.400529	0.500177	0.50846	0.309478	0.31819	0.353225	0.512886	0.333239	0.347193	0.563977	0.460116	0.282774	0.292706	0.324326	0.270915
1557	2	2	28.12	0.438731	0.302858	0.311206	0.329985	0.436632	0.454375	0.460632	0.358469	0.586042	0.575765	0.596365	0.434412	0.314441	0.356229	0.360476	0.358623	0.369074	0.577397	0.591703	0.509343	0.356081	0.341998	0.538845	0.606875	0.593199	0.585325	0.405591	0.327694	0.345942	0.317979	0.354182	0.364735	0.621814	0.392055	0.2996	0.334001	0.35653	0.62114	0.517419	0.279531	0.277256	0.309602	0.281682	0.390207	0.450957	0.256411
1279	2	2	30.27	0.699353	0.65419	0.563829	0.50702	0.664396	0.560958	0.535902	0.555645	0.572359	0.687208	0.643193	0.679765	0.432382	0.63689	0.387983	0.583086	0.703021	0.438016	0.452854	0.663983	0.714678	0.747008	0.6469	0.635715	0.441912	0.434535	0.390587	0.732999	0.7304	0.509304	0.606844	0.392673	0.412898	0.42934	0.69715	0.690835	0.63435	0.517504	0.396579	0.396603	0.374316	0.391859	0.675374	0.44835	0.354548	0.348617
1291	2	2	29.28	0.438529	0.324238	0.47784	0.589475	0.576639	0.569003	0.591461	0.460107	0.295619	0.30309	0.513065	0.530769	0.491232	0.325306	0.51894	0.385735	0.36508	0.498824	0.593288	0.415491	0.292876	0.325348	0.388739	0.286182	0.375676	0.336058	0.409849	0.334567	0.335576	0.330668	0.476633	0.608769	0.508532	0.333636	0.494051	0.601284	0.577651	0.535539	0.353521	0.293484	0.301966	0.341572	0.315616	0.293674	0.515365	0.483676
1321	2	2	30.21	0.488567	0.35992	0.370874	0.496541	0.4857	0.549166	0.435485	0.398306	0.437809	0.385189	0.400239	0.501164	0.444796	0.352252	0.355682	0.473941	0.403649	0.531126	0.553183	0.563584	0.563976	0.554572	0.545654	0.540605	0.426728	0.366004	0.488052	0.547358	0.353309	0.334106	0.462163	0.46758	0.536879	0.392354	0.336206	0.427306	0.526694	0.371998	0.325899	0.404922	0.312842	0.358703	0.517421	0.518559	0.30769	0.276853
1340	2	2	28.22	0.640067	0.580783	0.449909	0.626744	0.602656	0.549959	0.538896	0.552885	0.334297	0.614562	0.630233	0.627706	0.572511	0.582794	0.61474	0.574983	0.608299	0.519896	0.425854	0.528743	0.420818	0.65274	0.64489	0.591491	0.355846	0.343757	0.48422	0.570608	0.57942	0.381015	0.429439	0.478731	0.411382	0.63763	0.437451	0.327858	0.390856	0.563869	0.639964	0.535406	0.336728	0.360817	0.359561	0.362336	0.422627	0.346009
#Genotype: 2 = HOM
*Treatment: 1 = Vehicle; 2 = CORT
[truncated: 110 more columns]

[truncated: 18 more sheets: Fig 3 Suppl 2A, Fig 3 Suppl 2B, Fig 3 Suppl 3A, Fig 3 Suppl 3B, Fig 3 Suppl 3C, Fig 3 Suppl 3D, Fig 3 Suppl 3E, Fig 3 Suppl 3F, Fig 3 Suppl 4A, Fig 3 Suppl 4B, Fig 3 Suppl 4C, Fig 3 Suppl 4D, Fig 3 Suppl 4E, Fig 3 Suppl 4F, Fig 3 Suppl 4G, Fig 3 Suppl 4H, Fig 3 Suppl 4I, Fig 3 Suppl 4J]
