# Supplementary material for: A genetic variant of fatty acid amide hydrolase (FAAH) exacerbates hormone-mediated orexigenic feeding in mice
Source: eLife. 2023 Apr 11;12:e81919. doi: 10.7554/eLife.81919 (PMC10159625; doi:10.7554/eLife.81919)
Supplement: Figure 4—source data 1. [file elife-81919-fig4-data1.xlsx]

## Sheet: Fig 4A
Sample	Genotype#	Treatment *	pAMPK/AMPK (fold difference to WT-Vehicle)
2609	1	1	1.05901
2627	1	1	0.931063
2637	1	1	1.00993
2649	1	1	1.0217
2669	1	1	1.03598
2683	1	1	0.942318
2607	1	2	1.0282
2623	1	2	0.986848
2633	1	2	0.684036
2665	1	2	1.05654
2681	1	2	0.983837
2687	1	2	0.968438
2643	2	1	1.09614
2659	2	1	0.983676
2675	2	1	0.812702
2685	2	1	1.00048
2605	2	2	1.07867
2639	2	2	0.951761
2673	2	2	0.517762
2679	2	2	1.03457
2693	2	2	0.990038
#Genotype: 1 = WT; 2 = HOM
*Treatment: 1 = Vehicle; 2 = CORT

## Sheet: Fig 4B
Sample	Genotype#	Treatment *	pAMPK-motif/AMPK (fold difference to WT-Vehicle)
2609	1	1	0.936141
2627	1	1	1.02163
2637	1	1	1.04223
2649	1	1	0.996723
2669	1	1	0.960531
2683	1	1	1.04275
2607	1	2	1.60188
2623	1	2	1.37665
2633	1	2	1.35872
2665	1	2	1.37313
2681	1	2	1.45388
2687	1	2	0.89058
2643	2	1	0.965068
2659	2	1	0.810422
2675	2	1	1.01078
2685	2	1	0.73756
2605	2	2	3.06596
2639	2	2	2.08688
2673	2	2	1.95194
2679	2	2	3.07135
2693	2	2	1.78367
#Genotype: 1 = WT; 2 = HOM
*Treatment: 1 = Vehicle; 2 = CORT

## Sheet: Fig 4C
Sample	FAAH_Inhibition #	CORT_Treatment *	pAMPK/AMPK (fold difference to Vehicle-Vehicle)
1	1	1	1.0982
2	1	1	0.838287
3	1	1	1.04362
4	1	1	1.01483
5	1	1	1.01431
6	1	1	0.990759
7	1	2	1.26195
8	1	2	1.7795
9	1	2	2.41557
10	1	2	1.11591
11	1	2	1.6799
12	1	2	1.36001
13	2	1	1.0112
14	2	1	1.21216
15	2	1	1.56812
16	2	1	2.23022
17	2	1	2.03739
18	2	1	2.00291
19	2	2	3.12539
20	2	2	3.60724
21	2	2	6.99792
22	2	2	3.26703
23	2	2	5.37451
24	2	2	3.57316
#FAAH Inhibition: 1 = Vehicle; 2 = URB597
*Treatment: 1 = Vehicle; 2 = CORT

## Sheet: Fig 4D
Sample	FAAH_Inhibition #	CORT_Treatment *	pAMPK-motif/AMPK (fold difference to Vehicle-Vehicle)
1	1	1	1.01393
2	1	1	1.13998
3	1	1	0.765368
4	1	1	1.09841
5	1	1	0.889918
6	1	1	1.0924
7	1	2	1.00458
8	1	2	1.18166
9	1	2	1.3577
10	1	2	1.00893
11	1	2	1.49266
12	1	2	0.884775
13	2	1	1.3536
14	2	1	1.38242
15	2	1	1.61322
16	2	1	1.23612
17	2	1	1.26896
18	2	1	1.28908
19	2	2	3.14007
20	2	2	2.52661
21	2	2	1.84737
22	2	2	3.19737
23	2	2	4.18995
24	2	2	2.6577
#FAAH Inhibition: 1 = Vehicle; 2 = URB597
*Treatment: 1 = Vehicle; 2 = CORT

## Sheet: Fig 4E
ID	Genotype #	Compound C $	CORT *	FI_1	FI_2	FI_3	FI_4	FI_5	FI_6	FI_7	FI_8	FI_9	FI_10	FI_11	FI_12	FI_13	FI_14	FI_15	FI_16	FI_17	FI_18	FI_19	FI_20	FI_21	FI_22	FI_23	FI_24	FI_25	FI_26	FI_27	FI_28	FI_29	FI_30	FI_31	FI_32	FI_33	FI_34	FI_35	FI_36
3521	1	1	1	0.02	0.02	0.02	0.05	0.09	0.09	0.09	0.09	0.09	0.11	0.11	0.11	0.11	0.13	0.18	0.15	0.15	0.17	0.17	0.17	0.18	0.18	0.18	0.18	0.18	0.18	0.2	0.29	0.3	0.3	0.3	0.32	0.46	0.46	0.48	0.48
3541	1	1	1	0	0.03	0.03	0.15	0.25	0.29	0.4	0.4	0.45	0.46	0.58	0.6	0.6	0.62	0.62	0.62	0.62	0.72	0.72	0.74	0.91	0.91	0.91	0.91	1.06	1.07	1.07	1.07	1.2	1.2	1.2	1.33	1.33	1.37	1.37	1.52
3561	1	1	1	0.04	0.04	0.04	0.13	0.13	0.16	0.16	0.27	0.27	0.26	0.35	0.36	0.38	0.48	0.38	0.52	0.52	0.52	0.52	0.52	0.52	0.64	0.64	0.66	0.75	0.75	0.75	0.92	0.94	0.94	0.95	1.06	1.07	1.07	1.07	1.22
3621	1	1	1	0	0	0.02	0.02	0.04	0.05	0.07	0.2	0.22	0.22	0.26	0.26	0.26	0.33	0.38	0.42	0.43	0.55	0.57	0.57	0.71	0.72	0.74	0.8	0.82	0.84	0.82	0.96	0.97	0.97	0.99	1.03	1.05	1.07	1.17	1.19
3653	1	1	1	Spilled food
3497	1	1	2	0	0	0	0	0	0	0.07	0.09	0.2	0.2	0.22	0.34	0.34	0.36	0.35	0.37	0.37	0.39	0.52	0.52	0.54	0.54	0.54	0.7	0.72	0.72	0.74	0.74	0.74	0.76	0.76	0.91	0.91	0.93	0.93	1.1
3535	1	1	2	0	0	0	0.09	0.09	0.21	0.35	0.36	0.43	0.47	0.51	0.53	0.62	0.62	0.7	0.7	0.7	0.81	0.81	0.81	0.88	0.97	0.97	0.97	1.09	1.12	1.14	1.14	1.17	1.25	1.25	1.43	1.43	1.43	1.52	1.59
3551	1	1	2	0.02	0.12	0.12	0.12	0.12	0.31	0.31	0.33	0.33	0.36	0.36	0.4	0.46	0.46	0.54	0.54	0.54	0.56	0.65	0.66	0.66	0.68	0.74	0.74	0.76	0.76	0.78	0.88	0.88	0.9	0.91	1.02	1.02	1.04	1.05	1.07
3591	1	1	2	0.03	0.01	0.01	0.01	0.01	0.03	0.09	0.09	0.09	0.17	0.17	0.17	0.3	0.3	0.28	0.33	0.33	0.33	0.46	0.46	0.55	0.58	0.58	0.58	0.72	0.72	0.72	0.72	0.77	0.77	0.88	0.88	0.97	0.97	0.97	1.05
3611	1	1	2	0	0.02	0.02	0.05	0.05	0.11	0.23	0.23	0.34	0.34	0.4	0.4	0.48	0.49	0.5	0.56	0.56	0.56	0.56	0.69	0.72	0.8	0.8	0.94	0.94	1.01	1.01	1.11	1.11	1.21	1.21	1.36	1.36	1.36	1.47	1.51
3633	1	1	2	0	0	0	0	0	0.06	0.07	0.15	0.15	0.15	0.31	0.31	0.31	0.31	0.32	0.33	0.33	0.49	0.49	0.49	0.49	0.51	0.51	0.66	0.66	0.66	0.68	0.68	0.68	0.68	0.88	0.88	0.88	0.88	1.01	1.01
3375	1	1	2	0	0	0	0	0	0	0	0	0.02	0.02	0.02	0.1	0.1	0.1	0.22	0.23	0.23	0.23	0.23	0.36	0.38	0.38	0.38	0.44	0.44	0.44	0.46	0.62	0.64	0.68	0.7	0.7	0.71	0.72	0.81	0.81
3389	1	1	2	0	0	0	0	0.08	0.09	0.1	0.19	0.2	0.2	0.37	0.43	0.43	0.43	0.56	0.54	0.54	0.54	0.63	0.63	0.63	0.65	0.66	0.82	0.82	0.91	0.91	0.91	0.93	0.93	1.13	1.13	1.13	1.15	1.25	1.25
#Genotype: 1 = WT
$ Compound C: 1 = Saline
*Treatment: 1 = Vehicle; 2 = CORT

## Sheet: Fig 4F
ID	Genotype #	Compound C $	CORT *	FI_1	FI_2	FI_3	FI_4	FI_5	FI_6	FI_7	FI_8	FI_9	FI_10	FI_11	FI_12	FI_13	FI_14	FI_15	FI_16	FI_17	FI_18	FI_19	FI_20	FI_21	FI_22	FI_23	FI_24	FI_25	FI_26	FI_27	FI_28	FI_29	FI_30	FI_31	FI_32	FI_33	FI_34	FI_35	FI_36
3505	1	2	1	0	0	0	0	0	0	0	0	0	0	0	0	0	0	0.04	0.05	0.05	0.09	0.09	0.09	0.11	0.15	0.19	0.2	0.2	0.2	0.2	0.22	0.23	0.23	0.23	0.25	0.36	0.36	0.38	0.38
3539	1	2	1	0	0	0.02	0.12	0.14	0.19	0.2	0.36	0.36	0.46	0.49	0.49	0.58	0.73	0.73	0.73	0.73	0.83	0.83	0.83	0.92	1.03	1.1	1.12	1.12	1.14	1.14	1.14	1.27	1.27	1.29	1.39	1.39	1.41	1.41	1.55
3605	1	2	1	0	0	0	0	0	0	0	0	0	0	0	0.05	0.05	0.05	0.05	0.17	0.17	0.17	0.17	0.23	0.4	0.42	0.42	0.55	0.55	0.55	0.55	0.61	0.61	0.61	0.61	0.68	0.77	0.77	0.77	0.87
3369	1	2	1	0	0	0.02	0.04	0.04	0.04	0.04	0.07	0.1	0.12	0.15	0.19	0.19	0.19	0.19	0.19	0.2	0.2	0.22	0.23	0.23	0.23	0.25	0.25	0.25	0.46	0.46	0.46	0.46	0.48	0.48	0.71	0.72	0.72	0.72	0.74
3493	1	2	2	0	0	0	0	0	0	0.1	0.08	0.08	0.09	0.33	0.33	0.34	0.46	0.48	0.45	0.42	0.42	0.42	0.42	0.42	0.58	0.58	0.58	0.58	0.6	0.6	0.68	0.68	0.7	0.7	0.86	0.86	0.86	1	1
3533	1	2	2	0	0	0	0	0	0	0	0	0.06	0.06	0.07	0.14	0.17	0.18	0.17	0.07	0.21	0.21	0.22	0.23	0.35	0.36	0.36	0.46	0.46	0.49	0.64	0.64	0.64	0.64	0.81	0.82	0.82	0.82	0.84	0.94
3573	1	2	2	0	0	0	0	0	0	0.03	0.03	0.11	0.16	0.26	0.27	0.27	0.34	0.35	0.43	0.44	0.44	0.51	0.58	0.62	0.74	0.74	0.74	0.81	0.81	0.9	0.94	0.96	1.02	1.02	1.11	1.11	1.23	1.3	1.3
3623	1	2	2	0	0	0	0	0	0	0	0	0	0	0	0	0.07	0.08	0.08	0.15	0.14	0.14	0.15	0.26	0.29	0.35	0.35	0.45	0.45	0.57	0.57	0.57	0.59	0.59	0.6	0.67	0.67	0.69	0.79	0.79
3635	1	2	2	0	0	0	0	0	0	0	0	0	0	0	0.04	0.02	0	0	0.05	0.05	0.05	0.1	0.1	0.12	0.12	0.12	0.14	0.16	0.18	0.18	0.18	0.23	0.23	0.33	0.33	0.46	0.49	0.51	0.51
3387	1	2	2	0	0	0	0	0.01	0.01	0.14	0.14	0.15	0.15	0.17	0.17	0.18	0.43	0.43	0.43	0.43	0.43	0.55	0.55	0.55	0.55	0.69	0.69	0.71	0.72	0.72	0.86	0.86	0.88	0.88	1	1.02	1.02	1.04	1.31
#Genotype: 1 = WT
$ Compound C: 2 = Compound C
*Treatment: 1 = Vehicle; 2 = CORT

## Sheet: Fig 4G
ID	Genotype #	Compound C $	CORT *	FI_1	FI_2	FI_3	FI_4	FI_5	FI_6	FI_7	FI_8	FI_9	FI_10	FI_11	FI_12	FI_13	FI_14	FI_15	FI_16	FI_17	FI_18	FI_19	FI_20	FI_21	FI_22	FI_23	FI_24	FI_25	FI_26	FI_27	FI_28	FI_29	FI_30	FI_31	FI_32	FI_33	FI_34	FI_35	FI_36
3503	2	1	1	0	0	0	0	0	0	0.07	0.07	0.07	0.25	0.25	0.25	0.27	0.38	0.46	0.32	0.35	0.36	0.36	0.38	0.38	0.5	0.5	0.5	0.52	0.52	0.52	0.69	0.69	0.69	0.71	0.71	0.77	0.77	0.79	0.79
3583	2	1	1	0	0	0	0.1	0.1	0.37	0.37	0.37	0.37	0.4	0.4	0.4	0.4	0.4	0.43	0.47	0.45	0.58	0.58	0.58	0.58	0.58	0.58	0.7	0.7	0.7	0.7	0.71	0.8	0.8	0.8	0.8	0.95	0.95	0.95	0.95
3587	2	1	1	0	0	0.17	0.16	0.21	0.21	0.19	0.22	0.21	0.24	0.21	0.19	0.24	0.22	0.14	0.22	0.21	0.19	0.26	0.24	0.21	0.21	0.31	0.29	0.29	0.36	0.35	0.35	0.33	0.33	0.39	0.39	0.39	0.39	0.59	0.59
3619	2	1	1	0	0	0.03	0.03	0.01	0.05	0.13	0.11	0.08	0.06	0.24	0.21	0.21	0.19	0.17	0.2	0.19	0.17	0.16	0.14	0.28	0.26	0.24	0.27	0.26	0.26	0.24	0.24	0.24	0.24	0.24	0.35	0.35	0.35	0.35	0.42
3639	2	1	1	0	0	0	0.02	0	0.05	0.19	0.21	0.21	0.21	0.21	0.21	0.21	0.32	0.51	0.49	0.49	0.49	0.51	0.51	0.51	0.51	0.53	0.75	0.75	0.75	0.77	0.77	0.94	0.94	0.96	0.96	0.96	0.92	1.16	1.16
3643	2	1	1	0	0	0	0	0	0	0.07	0.09	0.09	0.09	0.09	0.12	0.12	0.12	0.1	0.13	0.11	0.11	0.11	0.11	0.11	0.21	0.22	0.22	0.23	0.31	0.29	0.29	0.29	0.3	0.3	0.3	0.38	0.48	0.48	0.48
3495	2	1	2	0	0	0	0	0	0	0.07	0.07	0.09	0.2	0.2	0.31	0.4	0.4	0.45	0.4	0.39	0.37	0.35	0.44	0.44	0.46	0.57	0.57	0.68	0.68	0.68	0.81	0.81	0.81	0.81	0.92	0.94	1.01	1.08	1.08
3529	2	1	2	0	0	0.13	0.13	0.14	0.15	0.22	0.3	0.3	0.32	0.33	0.45	0.45	0.46	0.46	0.48	0.48	0.54	0.63	0.63	0.65	0.65	0.65	0.66	0.83	0.83	0.83	0.85	1.03	1.03	1.05	1.05	1.22	1.22	1.24	1.24
3547	2	1	2	0	0	0.02	0.02	0.18	0.18	0.25	0.25	0.27	0.27	0.44	0.46	0.46	0.6	0.6	0.66	0.66	0.66	0.75	0.75	0.82	0.82	0.84	0.98	1	1	1.11	1.11	1.13	1.23	1.25	1.36	1.36	1.36	1.38	1.44
3575	2	1	2	0	0	0	0	0.08	0.08	0.08	0.08	0.22	0.23	0.23	0.23	0.34	0.34	0.36	0.36	0.33	0.33	0.32	0.32	0.32	0.32	0.32	0.33	0.46	0.55	0.55	0.55	0.55	0.57	0.66	0.66	0.66	0.66	0.73	0.82
3579	2	1	2	0	0.06	0.07	0.07	0.1	0.1	0.16	0.16	0.18	0.31	0.31	0.31	0.37	0.37	0.4	0.43	0.43	0.43	0.47	0.57	0.57	0.57	0.57	0.57	0.7	0.7	0.7	0.7	0.7	0.72	0.87	0.87	0.87	0.87	0.89	0.89
3607	2	1	2	0.06	0.04	0.09	0.11	0.13	0.09	0.06	0.21	0.17	0.33	0.3	0.27	0.38	0.35	0.33	0.39	0.35	0.45	0.42	0.4	0.39	0.37	0.49	0.49	0.49	0.62	0.68	0.68	0.68	0.68	0.68	0.86	0.86	0.88	0.88	0.99
3637	2	1	2	0.17	0.16	0.16	0.27	0.26	0.44	0.44	0.62	0.62	0.62	0.76	0.76	0.76	0.88	0.88	0.91	0.91	0.91	0.91	0.91	1.01	1.01	1.01	1.01	1.01	1.01	1.01	1.01	1.19	1.19	1.19	1.19	1.19	1.32	1.32	1.32
#Genotype: 2 = HOM
$ Compound C: 1 = Saline
*Treatment: 1 = Vehicle; 2 = CORT

## Sheet: Fig 4H
ID	Genotype #	Compound C $	CORT *	FI_1	FI_2	FI_3	FI_4	FI_5	FI_6	FI_7	FI_8	FI_9	FI_10	FI_11	FI_12	FI_13	FI_14	FI_15	FI_16	FI_17	FI_18	FI_19	FI_20	FI_21	FI_22	FI_23	FI_24	FI_25	FI_26	FI_27	FI_28	FI_29	FI_30	FI_31	FI_32	FI_33	FI_34	FI_35	FI_36
3501	2	2	1	0	0	0	0	0	0	0	0	0	0.02	0.02	0.02	0.02	0.02	0.02	0.04	0.24	0.24	0.24	0.24	0.25	0.27	0.27	0.27	0.27	0.47	0.54	0.54	0.54	0.54	0.56	0.56	0.56	0.76	0.76	0.78
3563	2	2	1	0	0	0	0	0	0	0	0	0	0	0	0	0.07	0.07	0.07	0.09	0.09	0.08	0.25	0.25	0.25	0.25	0.25	0.42	0.52	0.52	0.54	0.54	0.54	0.6	0.6	1.03	1.05	1.05	1.05	1.07
3577	2	2	1	0	0.16	0.16	0.17	0.17	0.2	0.2	0.2	0.2	0.27	0.27	0.27	0.29	0.33	0.45	0.38	0.4	0.4	0.42	0.47	0.47	0.52	0.6	0.6	0.68	0.74	0.78	0.79	0.79	0.81	0.89	0.89	0.91	0.91	1.05	1.05
3595	2	2	1	0	0.11	0.11	0.11	0.11	0.11	0.2	0.2	0.19	0.19	0.19	0.19	0.3	0.3	0.3	0.37	0.37	0.45	0.45	0.45	0.46	0.5	0.54	0.54	0.54	0.65	0.66	0.66	0.66	0.77	0.77	0.77	0.77	0.87	0.91	0.91
3617	2	2	1	0	0.02	0	0	0	0	0	0	0	0.12	0.1	0.08	0.06	0.13	-0.04	0	0.08	0.16	0.16	0.16	0.24	0.24	0.24	0.29	0.29	0.27	0.36	0.35	0.41	0.41	0.49	0.55	0.57	0.57	0.62	0.62
3523	2	2	2	0	0	0	0	0.07	0.09	0.09	0.18	0.22	0.23	0.23	0.3	0.3	0.33	0.35	0.34	0.34	0.36	0.52	0.54	0.54	0.64	0.57	0.75	0.77	0.77	0.79	0.94	0.96	1.07	1.07	1.09	1.09	1.18	1.19	1.32
3567	2	2	2	0	0.02	0.02	0.02	0.11	0.15	0.15	0.15	0.15	0.15	0.33	0.33	0.33	0.5	0.61	0.53	0.53	0.53	0.54	0.54	0.54	0.54	0.56	0.56	0.56	0.58	0.58	0.58	0.58	0.6	0.78	0.79	0.79	0.79	0.79	0.81
3581	2	2	2	0	0	0	0	0	0	0	0	0	0.24	0.37	0.37	0.37	0.37	0.48	0.57	0.57	0.55	0.56	0.64	0.56	0.66	0.66	0.79	0.81	0.81	0.81	0.83	0.83	0.83	0.94	0.95	0.95	0.95	0.97	1.08
3599	2	2	2	0.01	0.01	0.01	0	0	0	0	0	0	0	0	0	0	0.02	0.06	0.06	0.06	0.06	0.06	0.06	0.36	0.36	0.38	0.38	0.38	0.43	0.62	0.62	0.62	0.64	0.64	0.56	0.75	0.79	0.79	0.81
3625	2	2	2	0	0	0	0	0	0	0	0	0	0	0	0	0	0	0	0	0	0	0	0	0	0	0	0	0	0	0	0	0.03	0.03	0.03	0.03	0.03	0.03	0.03	0.03
#Genotype: 2 = HOM
$ Compound C: 2 = Compound C
*Treatment: 1 = Vehicle; 2 = CORT

## Sheet: Fig 4 Suppl 1A
ID	Genotype #	Compound C Treatment $	CORT Treatment*	24h_FI
3521	1	1	1	2.98
3541	1	1	1	4.36
3561	1	1	1	4.48
3621	1	1	1	3.69
3653	1	1	1	Spilled food
3497	1	1	2	4.63
3535	1	1	2	3.88
3551	1	1	2	3.54
3591	1	1	2	4.15
3611	1	1	2	3.3
3633	1	1	2	3.6
3375	1	1	2	2.97
3389	1	1	2	4.44
3505	1	2	1	2.16
3539	1	2	1	3.82
3605	1	2	1	3.12
3369	1	2	1	3.13
3493	1	2	2	3.31
3533	1	2	2	3.07
3573	1	2	2	4.49
3623	1	2	2	4.57
3635	1	2	2	2.25
3387	1	2	2	3.27
#Genotype: 1 = WT
$ Compound C Treatment: 1 = Saline; 2 = Compound C
*CORT Treatment: 1 = Vehicle; 2 = CORT

## Sheet: Fig 4 Suppl 1B
ID	Genotype #	Compound C Treatment $	CORT Treatment*	24h_FI
3503	2	1	1	3.61
3583	2	1	1	2.98
3587	2	1	1	2.5
3619	2	1	1	3.1
3639	2	1	1	4.85
3643	2	1	1	4
3495	2	1	2	3.08
3529	2	1	2	5.28
3547	2	1	2	5.05
3575	2	1	2	2.83
3579	2	1	2	3.42
3607	2	1	2	4.85
3637	2	1	2	4.21
3501	2	2	1	3.48
3563	2	2	1	5.88
3577	2	2	1	3.39
3595	2	2	1	6.36
3617	2	2	1	2.46
3523	2	2	2	5.42
3567	2	2	2	3.38
3581	2	2	2	4.66
3599	2	2	2	6.11
3625	2	2	2	2.13
#Genotype: 2 = HOM
$ Compound C Treatment: 1 = Saline; 2 = Compound C
*CORT Treatment: 1 = Vehicle; 2 = CORT
