# Supplementary material for: A genetic variant of fatty acid amide hydrolase (FAAH) exacerbates hormone-mediated orexigenic feeding in mice
Source: eLife. 2023 Apr 11;12:e81919. doi: 10.7554/eLife.81919 (PMC10159625; doi:10.7554/eLife.81919)
Supplement: Figure 5—source data 1. [file elife-81919-fig5-data1.xlsx]

## Sheet: Fig 5B
ID	CRISPR	BW_Pretreatment
16	1	33.2
17	1	39.8
23	1	34.8
32	1	29.8
42	1	26.2
44	1	28.8
45	1	31.4
47	1	40.2
49	1	42.1
61	1	30.4
63	1	34.4
15	1	29.6
18	1	42.4
19	1	41.9
24	1	23.9
41	1	33.3
43	1	36.4
48	1	32.6
50	1	40.5
62	1	43.3
64	1	33.3
3	2	40.9
4	2	29.3
7	2	41.7
8	2	36.3
10	2	41.1
11	2	48.2
14	2	39
20	2	38.7
22	2	42.7
26	2	33.6
28	2	32.7
30	2	38.1
34	2	41
36	2	32.8
38	2	41.1
39	2	29.5
51	2	50.6
53	2	32.7
56	2	30.1
58	2	32.5
59	2	31.9
1	2	44.3
2	2	34.1
5	2	36.9
6	2	35.7
9	2	36.3
12	2	52
13	2	41.6
21	2	36
25	2	28.8
27	2	42.5
29	2	38.7
31	2	35.2
33	2	33.2
35	2	41.8
37	2	27.6
40	2	37.5
52	2	33
54	2	34.5
55	2	39
57	2	30.2
60	2	32.9

## Sheet: Fig 5C
ID	CRISPR #	Treatment *	FI_1	FI_2	FI_3	FI_4	FI_5	FI_6	FI_7	FI_8	FI_9	FI_10	FI_11	FI_12	FI_13	FI_14	FI_15	FI_16	FI_17	FI_18	FI_19	FI_20	FI_21	FI_22	FI_23	FI_24	FI_25	FI_26	FI_27	FI_28	FI_29	FI_30	FI_31	FI_32	FI_33	FI_34
17	1	1	0	0	0	0	0	0	0	0	0	0	0	0	0.02	0.02	0	0	0	0	0	0	0	0	0	0.12	0.12	0.12	0.12	0.12	0.12	0.14	0.27	0.29	0.29	0.3
18	1	1	0	0	0	0	0	0.02	0.02	0.02	0.02	0.02	0.02	0.02	0.13	0.14	0.14	0.05	0.07	0.09	0.09	0.09	0.09	0.09	0.13	0.14	0.14	0.22	0.35	0.36	0.36	0.36	0.36	0.43	0.47	0.47
25	1	1	0	0	0	0	0	0	0	0.04	0.04	0.04	0.04	0.04	0.11	0.11	0.08	0.1	0.1	0.08	0.08	0.08	0.08	0.08	0.08	0.08	0.08	0.08	0.08	0.08	0.08	0.08	0.08	0.08	0.08	0.25
24	1	1	0	0	0	0	0	0	0	0	0.06	0.06	0.06	0.04	0.04	0.13	0.15	0.16	0.16	0.16	0.16	0.16	0.22	0.22	0.22	0.21	0.3	0.3	0.3	0.29	0.44	0.51	0.51	0.6	0.6	0.6
42	1	1	0.03	0.03	0.01	0.13	0.13	0.13	0.3	0.3	0.29	0.59	0.59	0.59	0.59	0.65	0.59	0.65	0.65	0.65	0.78	0.78	0.78	0.89	0.89	0.89	0.99	1.04	1.04	1.04	1.21	1.37	1.37	1.37	1.35	1.35
44	1	1	0	0	0	0	0.07	0.09	0.09	0.27	0.27	0.27	0.42	0.42	0.42	0.72	0.68	0.69	0.65	0.65	0.73	0.84	0.85	1.05	1.05	1.27	1.27	1.29	1.46	1.51	1.51	1.51	1.67	1.65	1.77	1.75
45	1	1	0	0	0.02	0.02	0.18	0.22	0.22	0.23	0.23	0.3	0.3	0.3	0.3	0.5	0.48	0.51	0.48	0.46	0.45	0.45	0.62	0.62	0.62	0.62	0.64	0.91	1	1	1.02	1.02	1.18	1.29	1.45	1.43
47	1	1	0	0	0	0	0	0.12	0.12	0.1	0.1	0.08	0.15	0.14	0.13	0.14	0.19	0.2	0.2	0.2	0.36	0.36	0.36	0.35	0.35	0.55	0.55	0.55	0.55	0.78	0.78	0.78	0.79	0.95	0.95	0.95
49	1	1	0	0	0	0	0	0	0	0	0	0	0	0	0	0.07	0.06	0.06	0.06	0.06	0.06	0.06	0.04	0.04	0.04	0.04	0.11	0.11	0.09	0.09	0.09	0.09	0.09	0.2	0.2	0.2
61	1	1	0	0	0	0	0	0	0	0	0	0.03	0.02	0.02	0.02	0.02	0.03	0.05	0.07	0.08	0.08	0.1	0.11	0.22	0.24	0.24	0.24	0.24	0.35	0.5	0.56	0.62	0.62	0.62	0.62	0.62
63	1	1	0	0	0.01	0.01	0.01	0.01	0.01	0.01	0.01	0.01	0.11	0.09	0.08	0.09	0.08	0.1	0.1	0.1	0.1	0.1	0.32	0.32	0.32	0.3	0.3	0.46	0.45	0.43	0.43	0.48	0.48	0.62	0.62	0.62
15	1	1	0	0	0	0	0	0.05	0.05	0.07	0.07	0.07	0.07	0.09	0.18	0.18	0.22	0.21	0.22	0.22	0.22	0.22	0.35	0.35	0.35	0.36	0.43	0.43	0.43	0.43	0.45	0.53	0.53	0.53	0.64	0.64
16	1	2	0.04	0.13	0.13	0.13	0.14	0.16	0.16	0.3	0.3	0.3	0.46	0.46	0.46	0.63	0.64	0.64	0.64	0.73	0.73	0.78	0.85	0.85	0.85	0.99	1.04	1.11	1.17	1.23	1.23	1.32	1.38	1.49	1.55	1.55
19	1	2	0	0	0	0	0	0	0.12	0.22	0.21	0.21	0.22	0.35	0.35	0.35	0.34	0.36	0.33	0.33	0.32	0.51	0.51	0.51	0.51	0.51	0.66	0.65	0.7	0.7	0.7	0.73	0.83	0.83	0.9	0.9
20	1	2	0	0	0	0	0	0	0	0	0	0	0	0	0	0	0	0	0	0	0	0	0	0	0	0	0	0	0	0	0	0	0	0	0	0.03
26	1	2	0.02	0.02	0.02	0.18	0.18	0.18	0.18	0.34	0.34	0.34	0.43	0.43	0.43	0.46	0.46	0.5	0.5	0.5	0.59	0.6	0.59	0.59	0.59	0.68	0.68	0.68	0.68	0.77	0.91	0.91	0.91	0.91	0.91	1.02
41	1	2	0	0	0	0	0	0.05	0.04	0.04	0.12	0.12	0.19	0.19	0.31	0.31	0.22	0.29	0.29	0.29	0.27	0.27	0.26	0.4	0.4	0.4	0.52	0.67	0.67	0.67	0.8	0.88	0.98	0.98	1.02	1.02
43	1	2	0	0	0	0	0.07	0.07	0.07	0.06	0.26	0.26	0.24	0.43	0.42	0.42	0.33	0.43	0.42	0.43	0.61	0.61	0.52	0.6	0.6	0.79	0.78	0.78	0.78	0.88	0.89	0.89	0.89	0.89	1.06	1.06
48	1	2	0	0	0	0	0	0	0	0	0	0	0.02	0.02	0.02	0	0	0	0	0	0.19	0.19	0.17	0.17	0.27	0.37	0.37	0.55	0.55	0.55	0.72	0.72	0.71	0.71	0.84	0.84
50	1	2	0.05	0.04	0.02	0.02	0.02	0.15	0.15	0.14	0.14	0.14	0.19	0.19	0.2	0.2	0.28	0.28	0.28	0.28	0.28	0.28	0.28	0.26	0.26	0.26	0.37	0.37	0.37	0.37	0.37	0.37	0.59	0.59	0.59	0.59
62	1	2	0	0	0	0	0	0	0	0.09	0.09	0.08	0.06	0.06	0.06	0.18	0.19	0.22	0.22	0.23	0.25	0.25	0.25	0.53	0.53	0.54	0.53	0.54	0.7	0.72	0.72	0.91	0.91	0.91	0.97	0.97
65	1	2	0.02	0	0	0.12	0.12	0.12	0.1	0.1	0.1	0.29	0.29	0.29	0.27	0.4	0.45	0.45	0.45	0.45	0.57	0.57	0.57	0.55	0.63	0.63	0.63	0.61	0.76	0.76	0.76	0.81	0.81	0.81	0.81	0.93
#CRISPR: 1 = AgRPControl
*Treatment: 1 = Vehicle; 2 = CORT

## Sheet: Fig 5D
ID	CRISPR #	Treatment *	FI_1	FI_2	FI_3	FI_4	FI_5	FI_6	FI_7	FI_8	FI_9	FI_10	FI_11	FI_12	FI_13	FI_14	FI_15	FI_16	FI_17	FI_18	FI_19	FI_20	FI_21	FI_22	FI_23	FI_24	FI_25	FI_26	FI_27	FI_28	FI_29	FI_30	FI_31	FI_32	FI_33	FI_34
3	2	1	0	0	0	0	0	0	0	0	0	0.08	0.08	0.08	0.08	0.08	0.08	0.1	0.1	0.1	0.1	0.1	0.1	0.1	0.1	0.1	0.12	0.12	0.12	0.12	0.12	0.14	0.14	0.14	0.15	0.24
4	2	1	0	0	0	0	0	0	0	0	0	0.03	0.03	0.05	0.05	0.05	0.05	0.07	0	0	0	0	0	0	0	0	0.1	0.03	0.07	0.07	0.07	0.11	0.11	0.11	0.09	0.09
7	2	1	0	0	0.06	0.06	0.11	0.11	0.11	0.11	0.11	0.11	0.27	0.27	0.27	0.27	0.37	0.41	0.41	0.41	0.41	0.41	0.43	0.57	0.5	0.58	0.68	0.68	0.68	0.68	0.68	0.7	0.75	0.75	0.95	0.95
8	2	1	0	0	0	0	0	0	0	0	0	0	0	0.11	0.11	0.13	0.09	0.15	0.15	0.15	0.15	0.15	0.17	0.17	0.32	0.33	0.33	0.33	0.4	0.4	0.4	0.4	0.5	0.5	0.48	0.46
10	2	1	0	0	0	0	0	0	0	0.09	0.09	0.09	0.09	0.26	0.26	0.26	0.26	0.25	0.25	0.25	0.27	0.27	0.46	0.46	0.48	0.48	0.49	0.49	0.64	0.66	0.66	0.77	0.77	0.77	0.79	0.97
11	2	1	0	0	0	0.03	0.03	0.03	0.12	0.12	0.05	0.1	0.25	0.25	0.25	0.28	0.22	0.26	0.26	0.26	0.26	0.26	0.37	0.37	0.12	0.14	0.67	0.67	0.67	0.38	0.38	0.3	0.91	0.91	0.71	0.93
21	2	1	0	0.02	0.02	0.02	0	0	0	0	0	0	0	0	0.15	0.14	0.14	0.15	0.14	0.14	0.14	0.14	0.14	0.16	0.31	0.31	0.31	0.31	0.31	0.31	0.53	0.53	0.53	0.53	0.53	0.53
23	2	1	0	0.07	0.06	0.07	0.07	0.07	0.06	0.17	0.17	0.17	0.33	0.33	0.33	0.35	0.33	0.35	0.35	0.35	0.35	0.45	0.45	0.45	0.57	0.61	0.61	0.61	0.61	0.84	0.84	0.84	0.84	0.84	0.84	1.01
28	2	1	0	0	0	0	0	0	0	0.09	0.09	0.09	0.12	0.12	0.12	0.27	0.25	0.27	0.27	0.27	0.26	0.26	0.26	0.37	0.37	0.37	0.37	0.37	0.37	0.53	0.53	0.53	0.53	0.58	0.66	0.66
30	2	1	0	0	0	0	0	0	0	0	0	0	0.14	0.14	0.13	0.13	0.1	0.15	0.14	0.14	0.14	0.13	0.38	0.38	0.38	0.38	0.38	0.48	0.48	0.48	0.46	0.51	0.57	0.62	0.62	0.71
32	2	1	0	0	0	0	0	0	0	0	0.08	0.08	0.08	0.08	0.06	0.06	0.05	0.06	0.06	0.06	0.06	0.06	0.08	0.09	0.09	0.09	0.09	0.09	0.09	0.22	0.22	0.22	0.23	0.23	0.43	0.43
34	2	1	0.04	0.04	0.02	0	0	0	0	0	0	0	0	0	0	0	0	0	0	0	0.05	0.13	0.28	0.28	0.4	0.39	0.53	0.53	0.65	0.65	0.65	0.75	0.75	0.73	0.88	0.86
36	2	1	0	0	0	0	0	0.06	0.06	0.04	0.06	0.06	0.06	0.17	0.2	0.19	0.19	0.19	0.17	0.16	0.16	0.16	0.3	0.29	0.29	0.29	0.52	0.52	0.52	0.5	0.5	0.72	0.72	0.71	0.71	0.71
38	2	1	0	0	0	0	0	0	0.05	0.04	0.04	0.04	0.14	0.13	0.13	0.13	0.07	0.18	0.18	0.18	0.18	0.18	0.34	0.34	0.34	0.39	0.49	0.49	0.49	0.48	0.6	0.68	0.71	0.71	0.71	0.8
39	2	1	0	0	0	0	0	0.15	0.15	0.15	0.17	0.17	0.38	0.38	0.38	0.38	0.32	0.36	0.35	0.35	0.35	0.35	0.33	0.8	0.8	0.8	0.78	0.78	0.78	0.89	1.13	1.13	1.13	1.13	1.24	1.24
51	2	1	0	0	0	0	0	0	0	0	0	0	0	0	0	0	0	0	0.04	0.04	0.02	0.02	0.02	0.02	0	0	0	0	0	0.22	0.21	0.21	0.21	0.21	0.21	0.19
53	2	1	0	0	0	0	0	0	0	0	0	0	0	0	0	0.02	0.02	0.02	0.02	0.02	0.02	0.02	0.11	0.11	0.11	0.13	0.13	0.14	0.3	0.3	0.3	0.3	0.45	0.58	0.56	0.56
56	2	1	0	0	0	0	0	0	0	0	0	0	0	0	0	0	0	0	0	0	0	0	0	0	0	0	0	0	0.41	0.41	0.41	0.43	0.43	0.43	0.43	0.77
58	2	1	0	0	0	0	0.04	0.04	0.02	0.04	0.04	0.04	0.04	0.15	0.18	0.17	0.17	0.17	0.17	0.16	0.16	0.16	0.16	0.16	0.14	0.14	0.14	0.14	0.14	0.31	0.31	0.31	0.31	0.31	0.31	0.31
59	2	1	0	0	0	0	0.11	0.11	0.09	0.09	0.13	0.13	0.22	0.22	0.22	0.22	0.22	0.22	0.22	0.22	0.21	0.21	0.35	0.35	0.35	0.35	0.33	0.44	0.44	0.44	0.52	0.68	0.68	0.68	0.68	0.68
1	2	2	0	0	0	0	0	0	0	0	0	0.22	0.22	0.23	0.39	0.39	0.39	0.38	0.4	0.4	0.59	0.59	0.68	0.68	0.68	0.87	0.87	0.95	0.95	1.11	1.14	1.14	1.22	1.22	1.3	1.32
2	2	2	0	0	0	0	0	0	0.14	0.14	0.15	0.15	0.15	0.15	0.24	0.25	0.25	0.42	0.37	0.37	0.37	0.4	0.4	0.4	0.4	0.58	0.58	0.64	0.64	0.69	0.69	0.69	0.82	0.82	0.82	0.88
5	2	2	0	0	0	0	0	0	0	0.09	0.09	0.11	0.23	0.23	0.25	0.25	0.38	0.51	0.51	0.51	0.51	0.51	0.51	0.51	0.77	0.77	0.77	0.79	0.8	0.82	0.85	0.87	0.87	1.05	1.07	1.07
6	2	2	0	0	0	0	0.02	0.02	0.02	0.02	0.02	0.09	0.09	0.09	0.27	0.27	0.26	0.3	0.3	0.3	0.3	0.37	0.37	0.37	0.51	0.51	0.56	0.56	0.72	0.72	0.72	0.86	0.86	0.86	0.86	0.92
9	2	2	0	0	0	0	0	0	0.07	0.1	0.1	0.1	0.18	0.18	0.18	0.18	0.22	0.24	0.24	0.24	0.24	0.24	0.24	0.29	0.43	0.43	0.43	0.59	0.59	0.6	0.71	0.72	0.72	0.85	0.85	0.85
12	2	2	0	0	0	0	0	0	0	0	0	0	0	0	0	0	0	0	0	0	0	0.11	0.11	0.11	0.11	0.11	0.11	0.37	0.37	0.37	0.39	0.39	0.6	0.59	0.55	0.55
14	2	2	0	0	0	0	0	0	0	0.21	0.28	0.3	0.3	0.3	0.3	0.32	0.33	0.33	0.33	0.33	0.35	0.35	0.36	0.54	0.54	0.54	0.56	0.56	0.56	0.58	0.84	0.85	0.85	0.84	0.82	0.8
22	2	2	0	0	0	0	0	0	0	0	0	0	0.12	0.12	0.12	0.12	0.07	0.09	0.09	0.09	0.09	0.09	0.23	0.27	0.27	0.27	0.27	0.27	0.27	0.27	0.27	0.44	0.44	0.44	0.44	0.44
27	2	2	0	0	0	0	0	0	0	0.1	0.12	0.12	0.2	0.2	0.2	0.31	0.27	0.29	0.29	0.29	0.41	0.41	0.41	0.53	0.53	0.53	0.53	0.67	0.67	0.67	0.73	0.78	0.79	0.84	0.84	0.84
29	2	2	0	0	0	0	0	0	0	0	0	0	0.11	0.11	0.11	0.11	0.11	0.11	0.11	0.11	0.11	0.11	0.11	0.11	0.11	0.15	0.15	0.15	0.14	0.14	0.14	0.14	0.28	0.28	0.28	0.28
31	2	2	0	0	0	0	0.03	0.03	0.03	0.07	0.06	0.06	0.16	0.16	0.16	0.26	0.25	0.26	0.26	0.26	0.24	0.32	0.32	0.32	0.4	0.4	0.39	0.46	0.54	0.54	0.54	0.54	0.54	0.8	0.8	0.8
33.1	2	2	0	0	0	0	0	0.04	0.04	0.04	0.04	0.1	0.1	0.12	0.12	0.1	0.1	0.1	0.15	0.15	0.15	0.15	0.15	0.15	0.15	0.15	0.16	0.16	0.16	0.16	0.16	0.16	0.2	0.19	0.19	0.19
33.2	2	2	0.02	0.07	0.06	0.06	0.06	0.04	0.12	0.12	0.12	0.36	0.36	0.35	0.35	0.35	0.57	0.56	0.54	0.54	0.54	0.54	0.54	0.77	0.77	0.77	0.79	0.79	0.99	0.99	0.97	0.97	1.07	1.06	1.06	1.28
35	2	2	0	0	0	0	0	0.1	0.1	0.1	0.16	0.16	0.39	0.39	0.37	0.45	0.55	0.55	0.55	0.55	0.53	0.53	0.69	0.69	0.82	0.82	0.82	0.9	0.9	1.03	1.03	1.03	1.15	1.15	1.25	1.3
37	2	2	0	0	0	0	0	0.11	0.11	0.11	0.17	0.17	0.28	0.28	0.3	0.3	0.33	0.3	0.33	0.33	0.52	0.54	0.54	0.54	0.67	0.67	0.79	0.79	0.79	0.87	0.87	0.87	0.97	0.99	1.01	1.01
40	2	2	0	0	0	0	0	0	0	0	0	0	0	0	0	0	0	0	0	0	0	0	0.09	0.09	0.09	0.09	0.11	0.25	0.25	0.26	0.25	0.27	0.27	0.42	0.39	0.37
52	2	2	0	0	0	0	0	0	0.15	0.12	0.12	0.1	0.1	0.25	0.29	0.29	0.29	0.33	0.35	0.35	0.35	0.35	0.33	0.42	0.42	0.42	0.42	0.48	0.48	0.49	0.49	0.51	0.56	0.67	0.67	0.67
54	2	2	0	0	0	0	0	0	0	0	0.11	0.16	0.16	0.17	0.16	0.16	0.33	0.33	0.33	0.33	0.33	0.33	0.33	0.33	0.47	0.47	0.47	0.72	0.72	0.7	0.72	0.78	0.84	0.84	0.9	0.9
55	2	2	0.14	0.13	0.13	0.19	0.19	0.17	0.17	0.18	0.17	0.17	0.17	0.17	0.17	0.17	0.17	0.17	0.16	0.16	0.16	0.14	0.13	0.13	0.13	0.13	0.11	0.15	0.33	0.33	0.32	0.32	0.32	0.34	0.44	0.55
57	2	2	0.05	0.04	0.04	0.16	0.14	0.13	0.21	0.26	0.26	0.26	0.26	0.42	0.42	0.42	0.42	0.42	0.42	0.42	0.42	0.55	0.55	0.55	0.55	0.79	0.79	0.79	0.79	0.78	0.86	0.86	0.86	0.86	0.91	1.03
60	2	2	0	0	0	0.04	0.04	0.02	0	0.13	0.11	0.11	0.22	0.21	0.21	0.24	0.25	0.27	0.27	0.27	0.29	0.29	0.41	0.41	0.46	0.48	0.48	0.49	0.61	0.66	0.66	0.66	0.8	0.8	0.84	0.84
#CRISPR: 2 = AgRPFAAH
*Treatment: 1 = Vehicle; 2 = CORT

## Sheet: Fig 5E
ID	CRISPR #	Leptin Treatment *	0h_BW_change	4h_BW_change	24h_BW_change
17	1	1	0	0.8	0.5
41	1	1	0	-0.1	-0.1
45	1	1	0	0.8	0.3
46	1	1	0	0.7	0.9
50	1	1	0	0.4	0
61	1	1	0	0	-0.3
65	1	1	0	0.1	0.3
15	1	2	0	-1.4	0.1
16	1	2	0	-1.3	-0.2
42	1	2	0	0.3	-0.1
43	1	2	0	-0.7	-0.8
44	1	2	0	0.2	0.2
48	1	2	0	0.1	-0.2
49	1	2	0	0.6	-0.3
62	1	2	0	0.5	-1.2
63	1	2	0	-0.2	0
#CRISPR: 1 = AgRPControl
*Treatment: 1 = Vehicle; 2 = Leptin

## Sheet: Fig 5F
ID	CRISPR #	Leptin Treatment *	FI_1	FI_2	FI_3	FI_4	FI_5	FI_6	FI_7	FI_8	FI_9	FI_10	FI_11	FI_12	FI_13	FI_14	FI_15	FI_16	FI_17	FI_18	FI_19	FI_20	FI_21	FI_22	FI_23	FI_24	FI_25	FI_26	FI_27	FI_28	FI_29	FI_30	FI_31	FI_32	FI_33	FI_34	FI_35	FI_36	FI_37	FI_38	FI_39	FI_40	FI_41	FI_42
17	1	1	0.05	0.07	0.29	0.29	0.29	0.56	0.56	0.74	0.79	1.05	1.05	1.05	1.14	1.14	1.14	1.14	1.14	1.31	1.34	1.34	1.52	1.52	1.52	1.8	1.8	1.8	1.88	1.88	2.1	2.1	2.16	2.16	2.16	2.16	2.16	2.31	2.31	2.31	2.31	2.49	2.49	2.49
41	1	1	0	0	0	0	0.02	0.13	0.14	0.36	0.48	0.48	0.45	0.45	0.73	0.8	0.8	0.82	0.82	0.82	0.82	1.03	1.09	1.09	1.07	1.06	1.26	1.31	1.31	1.67	1.79	1.77	1.77	1.77	2.01	2.2	2.2	2.2	2.18	2.18	2.18	2.29	2.31	2.31
45	1	1	0.05	0.07	0.2	0.22	0.41	0.43	0.53	0.68	0.85	0.88	1.14	1.14	1.28	1.58	1.58	1.54	1.52	1.52	1.73	1.99	1.99	2.3	2.3	2.36	2.34	2.39	2.7	2.74	2.79	2.79	2.79	2.91	2.89	2.89	3.13	3.15	3.21	3.28	3.3	3.28	3.26	3.26
46	1	1	0.05	0.05	0.05	0.25	0.25	0.44	0.44	0.68	0.82	0.96	1.05	1.18	1.4	1.6	1.6	1.56	1.56	1.54	1.89	1.89	1.89	2.28	2.44	2.55	2.53	2.53	2.53	2.84	2.86	2.86	2.97	3.32	3.42	3.42	3.42	3.67	3.69	3.69	3.87	3.97	3.95	3.93
50	1	1	0	0	0.1	0.12	0.19	0.28	0.37	0.49	0.57	0.62	0.62	0.62	0.82	1.09	1.3	1.2	1.22	1.24	1.24	1.24	1.24	1.24	1.2	1.18	1.44	1.66	1.72	1.72	1.74	1.8	1.8	1.78	1.78	1.76	1.99	2.12	2.25	2.25	2.25	2.25	2.23	2.23
61	1	1	0	0.1	0.1	0.14	0.28	0.33	0.41	0.48	0.75	0.81	0.81	0.81	0.83	0.81	1.04	1.16	1.16	1.26	1.28	1.28	1.42	1.59	1.65	1.63	1.61	1.61	1.82	2.1	2.33	2.35	2.37	2.38	2.37	2.62	2.69	2.71	2.8	2.8	2.82	2.84	2.84	2.84
65	1	1	0	0	0	0	0.03	0.2	0.29	0.29	0.45	0.52	0.58	0.63	0.76	0.76	0.72	0.91	0.99	1.21	1.21	1.21	1.19	1.19	1.44	1.51	1.66	1.66	1.66	1.66	1.66	1.76	1.76	1.92	2.04	2.04	2.04	2.04	2.04	2.04	2.2	2.2	2.2	2.2
15	1	2	0	0.04	0.04	0.09	0.11	0.2	0.27	0.29	0.32	0.35	0.38	0.44	0.46	0.46	0.52	0.53	0.53	0.67	0.71	0.72	0.85	1.02	1.07	1.06	1.1	1.27	1.35	1.37	1.44	1.58	1.6	1.78	1.76	1.83	1.89	2.06	2.08	2.08	2.1	2.23	2.23	2.21
16	1	2	0.13	0.15	0.23	0.23	0.27	0.3	0.27	0.32	0.26	0.27	0.3	0.33	0.36	0.48	0.44	0.49	0.63	0.63	0.63	0.8	0.79	0.89	0.89	0.89	1.16	1.16	1.36	1.36	1.53	1.53	1.69	1.69	1.78	1.94	1.94	1.94	1.94	1.94	2.11	2.22	2.29	2.29
42	1	2	0	0	0	0.02	0.05	0.11	0.13	0.31	0.31	0.44	0.49	0.6	0.6	0.88	0.88	0.85	0.85	0.85	0.91	1.08	1.08	1.25	1.37	1.37	1.37	1.37	1.56	1.57	1.57	1.56	1.56	1.56	1.75	1.85	1.87	1.95	1.95	1.95	2.06	2.13	2.13	2.13
43	1	2	0	0	0.14	0.13	0.28	0.32	0.29	0.34	0.34	0.47	0.57	0.64	0.82	0.82	0.86	0.83	0.92	1.07	1.3	1.3	1.43	1.43	1.6	1.6	1.79	1.91	1.94	2	2	2	2.12	2.21	2.27	2.27	2.46	2.63	2.62	2.62	2.62	2.65	2.78	2.78
44	1	2	0.04	0.04	0.04	0.14	0.15	0.32	0.39	0.45	0.42	0.54	0.61	0.51	0.75	0.75	0.77	0.76	0.81	0.78	0.97	0.97	1.11	1.11	1.08	1.19	1.21	1.34	1.44	1.46	1.48	1.48	1.62	1.76	1.76	1.76	1.76	1.78	2.02	2.08	2.09	2.22	2.2	2.2
48	1	2	0	0.02	0.02	0.02	0.02	0.1	0.18	0.18	0.5	0.57	0.71	0.69	0.69	0.69	0.88	0.88	0.91	0.94	1.04	1.17	1.23	1.18	1.18	1.52	1.52	1.63	1.72	1.72	1.79	1.79	1.88	1.88	2.06	2.08	2.08	2.08	2.06	2.22	2.22	2.22	2.25	2.32
49	1	2	0	0.04	0.12	0.12	0.14	0.22	0.39	0.39	0.39	0.75	0.89	0.89	0.89	0.87	1.29	1.3	1.36	1.36	1.36	1.45	1.45	1.45	1.32	1.71	1.89	1.94	1.93	1.93	1.93	2.01	2.28	2.33	2.46	2.46	2.46	2.46	2.66	2.56	2.66	2.59	2.59	2.59
62	1	2	Spilled Food
63	1	2	0.05	0.06	0.11	0.27	0.27	0.57	0.57	0.55	0.55	0.53	0.53	0.7	0.77	0.75	0.62	0.85	0.85	0.84	0.97	0.97	0.99	1.17	1.3	1.28	1.38	1.37	1.5	1.5	1.65	1.8	1.81	1.81	1.93	1.93	1.93	2.09	2.14	2.14	2.23	2.23	2.23	2.33
#CRISPR: 1 = AgRPControl
*Treatment: 1 = Vehicle; 2 = Leptin

## Sheet: Fig 5G
ID	CRISPR #	Leptin Treatment *	0h_BW_change	4h_BW_change	24h_BW_change
4	2	1	0	0.3	-0.3
6	2	1	0	0.4	-0.4
7	2	1	0	1.5	1.4
10	2	1	0	0.9	0.8
11	2	1	0	1.6	1.3
14	2	1	0	0.1	1.1
33	2	1	0	0.1	-0.6
34	2	1	0	0.5	-0.1
38	2	1	0	-0.3	0.3
52	2	1	0	0.4	0
53	2	1	0	0.1	-0.2
55	2	1	0	-0.6	0.4
58	2	1	0	0.7	0.8
60	2	1	0	-0.2	-0.4
2	2	2	0	-0.1	0.5
3	2	2	0	0	-0.1
5	2	2	0	1.1	0.8
8	2	2	0	0	0.1
9	2	2	0	0.2	0.4
12	2	2	0	1.7	0.6
35	2	2	0	0.2	1.1
36	2	2	0	0.9	1.1
39	2	2	0	-0.4	-0.5
40	2	2	0	-0.6	-1.5
51	2	2	0	1	0.3
54	2	2	0	0.1	0.9
56	2	2	0	0.4	-0.2
57	2	2	0	0	0
59	2	2	0	0.1	-0.6
*Treatment: 1 = Vehicle; 2 = Leptin

## Sheet: Fig 5H
ID	CRISPR #	Leptin Treatment *	FI_1	FI_2	FI_3	FI_4	FI_5	FI_6	FI_7	FI_8	FI_9	FI_10	FI_11	FI_12	FI_13	FI_14	FI_15	FI_16	FI_17	FI_18	FI_19	FI_20	FI_21	FI_22	FI_23	FI_24	FI_25	FI_26	FI_27	FI_28	FI_29	FI_30	FI_31	FI_32	FI_33	FI_34	FI_35	FI_36	FI_37	FI_38	FI_39	FI_40	FI_41	FI_42
4	2	1	0	0	0	0	0	0	0.2	0.2	0.22	0.27	0.34	0.68	0.86	1.01	1.01	0.99	0.99	0.99	0.99	1.12	1.12	1.29	1.45	1.57	1.57	1.57	1.74	1.74	1.74	1.98	2.04	2.04	2.04	2.04	2.22	2.38	2.38	2.4	2.4	2.55	2.55	2.55
6	2	1	0	0	0.05	0.13	0.27	0.48	0.57	0.67	0.67	0.87	1.14	1.5	1.53	1.53	1.53	1.56	1.75	1.8	2.01	2.01	2.01	2.08	2.17	2.17	2.23	2.47	2.47	2.49	2.49	2.49	2.59	2.93	2.93	2.95	2.95	3.24	3.24	3.24	3.4	3.4	3.4	3.4
7	2	1	0.02	0.02	0.04	0.04	0.36	0.36	0.47	0.47	0.57	0.73	0.91	1.19	1.19	1.31	1.58	1.56	1.7	1.7	1.85	1.85	2.07	2.07	2.19	2.28	2.28	2.28	2.54	2.81	2.81	2.81	2.81	2.81	2.81	2.81	2.81	3.02	3.1	3.31	3.31	3.31	3.31	3.31
10	2	1	0.08	0.09	0.09	0.14	0.29	0.41	0.57	0.67	0.67	0.67	0.87	1.29	1.29	1.27	1.12	1.31	1.32	1.32	1.44	1.44	1.44	1.81	2.04	2.04	2.04	2.18	2.18	2.18	2.18	2.43	2.64	2.71	2.71	2.73	2.73	2.73	2.83	3.05	3.1	3.1	3.1	3.1
11	2	1	0	0	0.26	0.26	0.26	0.42	0.57	0.63	0.63	0.75	0.96	0.96	1.11	1.11	1.11	1.22	1.22	1.25	1.39	1.46	1.58	1.81	1.9	1.9	2.23	2.25	2.25	2.38	2.46	2.46	2.46	2.6	2.65	2.65	2.78	2.88	2.88	2.88	2.96	2.96	2.96	2.96
14	2	1	0.02	0.02	0.02	0.2	0.2	0.3	0.38	0.38	0.49	0.53	0.59	0.73	0.73	1.03	0.85	1.09	1.25	1.25	1.32	1.32	1.32	1.32	1.63	1.63	1.84	1.92	1.9	1.9	1.92	1.92	2.13	2.41	2.48	2.48	2.48	2.62	2.72	2.8	2.82	2.82	2.82	2.8
33	2	1	0.02	0.02	0.02	0.02	0.04	0.05	0.04	0.21	0.39	0.47	0.47	0.71	0.71	0.86	0.91	1.03	1.24	1.26	1.26	1.61	1.85	1.85	1.83	1.97	1.97	1.97	2.28	2.34	2.58	2.98	2.98	2.98	2.98	3.11	3.23	3.23	3.23	3.41	3.73	3.9	3.9	3.9
34	2	1	0	0	0	0	0.12	0.19	0.22	0.21	0.56	0.58	0.76	0.83	0.95	1.08	1.11	1.07	1.04	1.05	1.21	1.23	1.26	1.48	1.48	1.46	1.6	1.64	1.76	1.79	1.84	1.84	1.84	1.82	2.16	2.18	2.18	2.33	2.33	2.22	2.41	2.39	2.37	2.38
38	2	1	0.04	0.04	0.02	0.09	0.26	0.32	0.45	0.47	0.69	0.69	0.86	0.86	1.1	1.1	1.1	1.09	1.11	1.11	1.11	1.11	1.4	1.4	1.38	1.38	1.41	1.69	1.69	1.68	1.81	2.02	2.41	2.61	2.66	2.87	2.98	2.98	2.98	2.98	3.01	3.11	3.16	3.16
52	2	1	0	0	0	0	0	0.38	0.38	0.38	0.78	0.87	1.23	1.23	1.23	1.23	1.23	1.25	1.34	1.34	1.36	1.51	1.51	1.6	1.67	1.84	2	2.05	2	2.15	2.15	2.3	2.46	2.46	2.46	2.46	2.43	2.65	2.92	2.94	2.94	2.94	2.96	2.96
53	2	1	0	0	0	0.07	0.06	0.2	0.35	0.35	0.58	0.81	0.88	0.88	0.88	0.88	1.18	1.22	1.2	1.2	1.2	1.49	1.65	1.71	1.73	1.75	1.91	1.91	2.1	2.25	2.28	2.3	2.32	2.32	2.34	2.34	2.53	2.72	2.84	2.84	2.84	2.84	2.84	2.86
55	2	1	0	0	0	0	0.05	0.11	0.18	0.18	0.24	0.25	0.38	0.38	0.4	0.4	0.67	0.66	0.66	0.83	0.83	0.83	0.83	0.97	0.97	0.97	1.31	1.32	1.5	1.5	1.5	1.5	1.71	1.95	1.95	1.95	2.11	2.26	2.26	2.38	2.38	2.46	2.46	2.55
58	2	1	Spilled Food
60	2	1	0	0	0.03	0.09	0.09	0.26	0.26	0.38	0.54	0.54	0.55	0.71	0.84	0.8	0.76	0.82	0.99	1.01	1.05	1.07	1.11	1.11	1.07	1.18	1.35	1.35	1.37	1.41	1.44	1.51	1.66	1.75	1.73	1.68	1.95	2.26	2.28	2.3	2.26	2.34	2.59	2.57
2	2	2	0	0.07	0.07	0.07	0.24	0.24	0.31	0.36	0.49	0.59	0.73	0.91	0.97	1.01	1.12	1.19	1.2	1.25	1.39	1.56	1.57	1.57	1.66	1.73	1.73	1.92	1.94	2.15	2.26	2.26	2.38	2.62	2.7	2.7	2.72	2.82	2.94	2.94	3.06	2.98	2.96	2.96
3	2	2	0	0	0	0.05	0.05	0.2	0.27	0.38	0.56	0.7	0.93	1.16	1.39	1.51	1.59	1.6	1.58	1.58	1.6	1.6	1.62	1.62	1.76	2.07	2.29	2.31	2.33	2.33	2.33	2.52	2.54	2.54	2.54	2.54	3.02	3.04	3.04	3.04	3.27	3.37	3.4	3.4
5	2	2	0	0.06	0.04	0.2	0.19	0.2	0.2	0.25	0.25	0.45	0.6	0.71	0.71	0.85	0.94	0.97	1.02	1.02	1.23	1.33	1.4	1.44	1.71	1.73	1.73	1.82	1.91	2.19	2.29	2.31	2.33	2.47	2.63	2.78	2.78	2.78	2.78	2.87	2.89	2.91	3	3
8	2	2	0	0	0	0.09	0.11	0.28	0.32	0.5	0.66	0.73	0.77	0.85	1.02	1.1	1.17	1.16	1.14	1.22	1.38	1.38	1.3	1.32	1.55	1.56	1.54	1.52	1.52	1.52	1.56	1.72	1.72	1.72	1.7	1.87	2.03	2.03	2.03	2.37	2.48	2.48	2.48	2.48
9	2	2	0	0	0	0	0.13	0.22	0.23	0.27	0.41	0.46	0.46	0.64	0.87	0.87	1.02	1	1.03	1.17	1.19	1.28	1.28	1.28	1.28	1.5	1.69	1.89	1.97	2.08	2.08	2.08	2.26	2.31	2.31	2.4	2.58	2.73	2.76	2.76	2.76	2.76	2.79	2.79
12	2	2	0.1	0.15	0.18	0.2	0.25	0.25	0.45	0.4	0.56	0.56	0.56	0.86	0.88	0.91	0.95	0.96	0.94	0.94	1.24	1.47	1.28	1.51	1.72	1.68	1.66	1.88	2.1	2.35	2.38	2.4	2.53	2.67	2.71	2.88	2.88	2.9	2.92	2.94	2.98	2.98	2.94	2.9
35	2	2	0.05	0.07	0.12	0.12	0.35	0.35	0.43	0.5	0.69	0.67	0.89	1.11	1.17	1.42	1.59	1.56	1.56	1.56	1.84	1.84	1.98	1.98	2.16	2.16	2.44	2.44	2.54	2.77	2.77	2.77	3.01	3.01	2.99	2.99	2.99	3.48	3.51	3.51	3.49	3.49	3.66	3.72
36	2	2	0.04	0.07	0.07	0.07	0.15	0.21	0.26	0.44	0.44	0.58	0.58	0.89	1.06	1.06	1.06	1.05	1.05	1.05	1.03	1.1	1.1	1.29	1.4	1.4	1.47	1.6	1.6	1.69	1.69	1.69	2.03	2.08	2.11	2.11	2.11	2.11	2.11	2.18	2.26	2.34	2.34	2.34
39	2	2	0.15	0.18	0.18	0.18	0.25	0.27	0.3	0.32	0.49	0.51	0.53	0.56	0.7	0.77	0.77	0.72	0.74	0.76	0.76	0.76	0.87	0.99	0.99	0.99	1.1	1.12	1.2	1.2	1.32	1.4	1.4	1.4	1.4	1.47	1.61	1.61	1.61	1.7	1.7	1.7	1.7	1.7
40	2	2	0	0	0	0	0.02	0.02	0.04	0.06	0.04	0.18	0.2	0.3	0.3	0.33	0.43	0.4	0.39	0.37	0.55	0.66	0.77	0.77	0.77	0.75	0.96	1.21	1.21	1.23	1.23	1.45	1.45	1.53	1.51	1.49	1.56	1.66	1.66	1.69	1.69	1.68	1.78	1.76
51	2	2	0.07	0.11	0.07	0.09	0.09	0.11	0.13	0.14	0.14	0.27	0.29	0.29	0.4	0.43	0.43	0.91	0.95	0.95	1.16	1.16	1.28	1.39	1.39	1.6	1.72	1.82	2.04	2.08	2.29	2.31	2.31	2.31	2.31	2.55	2.57	2.57	2.57	2.57	2.57	2.8	2.8	2.8
54	2	2	0	0	0	0.07	0.14	0.15	0.23	0.23	0.23	0.34	0.34	0.45	0.45	0.45	0.57	0.53	0.53	0.67	0.67	0.78	0.78	0.9	1.01	1.11	1.11	1.11	1.3	1.3	1.3	1.3	1.44	1.53	1.53	1.53	1.53	1.64	1.76	1.76	1.76	1.76	1.86	1.96
56	2	2	0	0	0	0	0.14	0.15	0.15	0.17	0.49	0.57	0.59	0.6	0.81	1.22	1.3	1.27	1.27	1.25	1.27	1.27	1.4	1.7	1.77	2.04	2.21	2.19	2.19	2.19	2.22	2.3	2.67	2.82	2.82	2.82	2.8	2.8	2.8	2.93	3.44	3.66	3.7	3.7
57	2	2	0	0	0	0.07	0.14	0.46	1.03	1.29	1.31	1.55	1.55	1.57	1.57	1.76	1.76	1.86	1.89	1.92	2	2	2	2.02	2.16	2.29	2.4	2.88	3.22	3.24	3.24	3.24	3.24	3.26	3.31	3.58	3.74	3.74	3.81	3.81	3.81	3.83	3.9	4.05
59	2	2	0	0	0	0	0.18	0.22	0.41	0.41	0.44	0.66	0.65	0.65	0.7	0.7	0.7	0.65	0.66	0.66	0.72	0.87	0.89	0.89	0.99	1.04	1.04	1.13	1.13	1.13	1.29	1.29	1.38	1.55	1.55	1.55	1.55	1.57	1.65	1.77	1.77	1.77	1.83	1.83
#CRISPR: 2 = AgRPFAAH
*Treatment: 1 = Vehicle; 2 = Leptin

## Sheet: Fig 5 Suppl 1
ID	CRISPR Condition	FAAH_Vmax
1	CamKIIControl	7495
2	CamKIIControl	3746
3	CamKIIFAAH	2375
4	CamKIIFAAH	1762
5	CamKIIFAAH	988.2
6	CamKIIFAAH	2409
