# Supplementary material for: A genetic variant of fatty acid amide hydrolase (FAAH) exacerbates hormone-mediated orexigenic feeding in mice
Source: eLife. 2023 Apr 11;12:e81919. doi: 10.7554/eLife.81919 (PMC10159625; doi:10.7554/eLife.81919)
Supplement: Figure 6—source data 1. [file elife-81919-fig6-data1.xlsx]

## Sheet: Fig 6A
ID	Genotype #	Ghrelin Treatment *	FI_1	FI_2	FI_3	FI_4	FI_5	FI_6	FI_7	FI_8	FI_9	FI_10	FI_11	FI_12	FI_13	FI_14	FI_15	FI_16	FI_17	FI_18	FI_19	FI_20	FI_21	FI_22	FI_23	FI_24	FI_25	FI_26	FI_27	FI_28	FI_29	FI_30	FI_31	FI_32	FI_33	FI_34	FI_35	FI_36	FI_37
1775	1	1	No data, dysfunctional scale
1791	1	1	Spilled food
1805	1	1	0	0	0	0.02	0.08	0.08	0.06	0.04	0.04	0.13	0.13	0.11	0.11	0.09	0.15	0.14	0.15	0.15	0.15	0.15	0.33	0.33	0.33	0.33	0.35	0.35	0.54	0.54	0.54	0.53	0.53	0.53	0.68	0.7	0.76	0.87	1.04
1817	1	1	0	0	0	0	0	0	0	0	0	0.08	0.08	0.08	0.08	0.08	0.09	0.09	0.09	0.09	0.09	0.09	0.09	0.09	0.09	0.23	0.23	0.23	0.23	0.23	0.25	0.35	0.35	0.35	0.36	0.5	0.6	0.6	0.7
1825	1	1	0	0.01	0.01	0.01	0.01	0.01	0.01	0.01	0.18	0.07	0.11	0.13	0.18	0.2	0.2	0.2	0.2	0.22	0.22	0.37	0.44	0.44	0.44	0.44	0.44	0.62	0.62	0.62	0.62	0.62	0.62	0.77	0.77	0.77	0.77	0.83	0.99
1831	1	1	0.02	0.04	0	0	0	0	0	0.04	0.06	0.06	0.06	0.07	0.22	0.2	0.22	0.22	0.22	0.22	0.22	0.43	0.42	0.42	0.47	0.47	0.61	0.61	0.61	0.61	0.76	0.76	0.76	0.83	0.89	0.89	1.09	1.09	1.44
2951	1	1	0	0	0	0.14	0.14	0.14	0.28	0.26	0.26	0.26	0.31	0.33	0.32	0.38	0.47	0.46	0.45	0.58	0.57	0.6	0.59	0.56	0.58	0.71	0.71	0.72	0.72	0.72	0.71	0.75	0.75	0.91	0.91	0.9	0.93	1.02	1.02
2977	1	1	0.07	0.12	0.13	0.15	0.17	0.17	0.16	0.16	0.13	0.26	0.26	0.27	0.27	0.29	0.25	0.24	0.2	0.22	0.36	0.36	0.36	0.36	0.36	0.36	0.42	0.42	0.43	0.43	0.42	0.39	0.49	0.49	0.49	0.49	0.62	0.64	0.64
2989	1	1	0.07	0.07	0.07	0.07	0.07	0.07	0.09	0.06	0.07	0.07	0.07	0.08	0.09	0.1	0.04	0.04	0.04	0.04	0.04	0.04	0.04	0.04	0.05	0.18	0.18	0.18	0.18	0.18	0.2	0.2	0.2	0.2	0.2	0.21	0.38	0.51	0.51
3025	1	1	0	0	0	0	0	0.09	0.09	0.09	0.09	0.09	0.11	0.11	0.21	0.21	0.23	0.22	0.22	0.21	0.21	0.34	0.34	0.34	0.34	0.34	0.34	0.34	0.48	0.48	0.49	0.49	0.49	0.61	0.61	0.63	0.63	0.7	0.77
1761	1	2	0	0	0	0	0.29	0.57	0.57	0.55	0.55	0.55	0.55	0.55	0.69	0.71	0.76	0.76	0.76	0.74	0.74	0.72	0.72	0.87	0.87	0.85	0.85	0.84	0.96	0.96	0.96	0.96	0.96	0.96	1.04	1.04	1.12	1.21	1.27
1783	1	2	0	0	0	0	0	0.05	0.04	0.04	0.04	0.02	0.02	0.02	0.14	0.1	0.18	0.18	0.18	0.18	0.18	0.18	0.18	0.29	0.29	0.29	0.29	0.42	0.42	0.42	0.42	0.51	0.51	0.51	0.63	0.63	0.63	0.87	1.08
1793	1	2	0	0	0	0	0	0	0.06	0.06	0.06	0.04	0.04	0.04	0.04	0.04	0.04	0.04	0.04	0.02	0.02	0	0	0	0	0	0	0	0.12	0.12	0.12	0.12	0.12	0.12	0.34	0.34	0.34	0.34	0.54
1815	1	2	0	0	0	0	0	0	0	0.16	0.16	0.16	0.16	0.16	0.17	0.42	0.45	0.45	0.45	0.45	0.45	0.43	0.43	0.68	0.68	0.68	0.66	0.66	0.66	0.66	0.85	1.01	1.01	1.01	1.01	1.01	1.1	1.4	1.4
1829	1	2	0	0	0	0	0	0	0	0	0	0.11	0.13	0.11	0.13	0.03	0.09	0.08	0.14	0.13	0.22	0.21	0.25	0.3	0.35	0.36	0.38	0.37	0.46	0.48	0.46	0.48	0.46	0.53	0.57	1.02	1.11	1.22	1.45
1845	1	2	0.02	0.02	0.02	0.02	0.02	0	0.06	0.07	0.06	0.06	0.06	0.06	0.06	0.06	0.19	0.19	0.19	0.17	0.18	0.17	0.26	0.26	0.26	0.26	0.27	0.27	0.27	0.27	0.27	0.27	0.27	0.27	0.38	0.54	0.73	0.91	1.03
1851	1	2	0	0	0	0	0	0.16	0.29	0.29	0.29	0.39	0.39	0.39	0.39	0.36	0.26	0.27	0.29	0.44	0.44	0.44	0.46	0.46	0.48	0.48	0.48	0.68	0.66	0.66	0.65	0.65	0.65	0.84	0.85	0.85	0.97	1.12	1.21
2959	1	2	0.02	0.02	0.02	0.02	0.02	0.02	0.02	0.1	0.12	0.12	0.12	0.12	0.12	0.12	0.19	0.19	0.19	0.2	0.19	0.19	0.35	0.35	0.35	0.35	0.35	0.36	0.55	0.55	0.55	0.55	0.55	0.55	0.55	0.74	0.74	0.84	0.84
3001	1	2	0	0	0	0	0.07	0.07	0.06	0.06	0.13	0.14	0.19	0.19	0.19	0.24	0.3	0.29	0.29	0.35	0.39	0.39	0.39	0.43	0.43	0.54	0.54	0.54	0.54	0.54	0.65	0.66	0.66	0.66	0.66	0.66	0.78	0.78	0.78
3003	1	2	0.03	0.03	0.04	0.05	0.07	0.09	0.09	0.25	0.24	0.24	0.24	0.24	0.25	0.25	0.24	0.24	0.22	0.22	0.23	0.22	0.42	0.42	0.43	0.43	0.43	0.58	0.58	0.6	0.59	0.59	0.59	0.72	0.72	0.72	0.9	0.9	1.04
#Genotype: 1 = WT
*Treatment: 1 = Vehicle; 2 = Ghrelin

## Sheet: Fig 6B
ID	Genotype #	Ghrelin Treatment *	FI_1	FI_2	FI_3	FI_4	FI_5	FI_6	FI_7	FI_8	FI_9	FI_10	FI_11	FI_12	FI_13	FI_14	FI_15	FI_16	FI_17	FI_18	FI_19	FI_20	FI_21	FI_22	FI_23	FI_24	FI_25	FI_26	FI_27	FI_28	FI_29	FI_30	FI_31	FI_32	FI_33	FI_34	FI_35	FI_36	FI_37
1669	2	1	0	0	0	0	0	0	0.04	0.04	0.04	0.04	0.04	0.04	0.04	0.04	0.05	0.18	0.18	0.17	0.17	0.17	0.16	0.17	0.17	0.2	0.31	0.31	0.31	0.31	0.3	0.3	0.4	0.4	0.42	0.55	0.58	0.74	0.79
1697	2	1	0.02	0	0.03	0.01	0.14	0.06	0.07	0.04	0.08	0.07	0.07	0.00999999	0.01	0.15	0.17	-1.49012e-08	-1.49012e-08	0.02	-0.01	0.02	0.04	0.04	0.06	0.07	0.27	0.23	0.25	0.25	0.27	0.25	0.26	0.27	0.39	0.38	0.39	0.53	0.64
1703	2	1	0	0	0	0.05	0.05	0.05	0.05	0.05	0.06	0.06	0.07	0.15	0.15	0.14	0.14	-7.45058e-09	0.1	0.1	0.12	0.12	0.12	0.12	0.12	0.4	0.46	0.48	0.48	0.47	0.5	0.5	0.49	0.77	0.77	0.77	0.87	1.15	1.27
1769	2	1	0	0	0	0	0	0.09	0.09	0.08	0.08	0.08	0.08	0.08	0.08	0.11	0.17	0.17	0.17	0.2	0.28	0.28	0.28	0.28	0.28	0.26	0.5	0.48	0.49	0.49	0.49	0.49	0.49	0.62	0.62	0.7	0.86	1.03	1.08
1789	2	1	0.11	0.11	0.11	0.11	0.11	0.14	0.18	0.18	0.18	0.18	0.18	0.18	0.22	0.29	0.3	0.29	0.3	0.3	0.3	0.3	0.3	0.3	0.55	0.56	0.56	0.56	0.56	0.56	0.68	0.68	0.69	0.68	0.68	0.91	1.05	1.1	1.26
1819	2	1	0	0	0	0	0.01	0	0	0	0	0.01	0.01	0.1	0.1	0.15	0.16	0.15	0.15	0.15	0.15	0.15	0.15	0.15	0.15	0.15	0.24	0.24	0.24	0.24	0.24	0.24	0.24	0.39	0.43	0.42	0.66	0.66	0.81
1853	2	1	0	0	0	0	0.07	0.11	0.17	0.17	0.16	0.16	0.16	0.31	0.37	0.35	0.36	0.36	0.36	0.36	0.36	0.5	0.5	0.5	0.5	0.49	0.49	0.49	0.53	0.5	0.68	0.68	0.68	0.68	0.84	0.95	1.04	1.13	1.38
2961	2	1	0	0.02	0.02	0	0	0.1	0.1	0.08	0.08	0.09	0.09	0.23	0.23	0.22	0.22	0.21	0.22	0.23	0.23	0.22	0.33	0.33	0.33	0.33	0.32	0.33	0.33	0.33	0.33	0.33	0.53	0.54	0.53	0.53	0.54	0.54	0.57
2999	2	1	0	0	0	0	0	0	0	0	0	0	0	0	0.12	0.12	0.11	0.11	0.11	0.11	0.11	0.11	0.11	0.27	0.27	0.27	0.27	0.27	0.27	0.27	0.27	0.27	0.27	0.27	0.43	0.43	0.43	0.43	0.43
3015	2	1	0	0	0	0	0	0	0	0	0.18	0.18	0.18	0.18	0.18	0.25	0.27	0.27	0.29	0.35	0.35	0.35	0.35	0.35	0.35	0.33	0.33	0.55	0.65	0.65	0.65	0.65	0.65	0.65	0.65	0.65	0.78	0.78	0.78
3023	2	1	0.07	0.09	0.11	0.11	0.14	0.15	0.14	0.27	0.32	0.33	0.33	0.35	0.36	0.36	0.4	0.42	0.4	0.4	0.4	0.56	0.56	0.56	0.56	0.56	0.6	0.6	0.62	0.62	0.62	0.62	0.62	0.62	0.62	0.62	0.78	0.79	0.78
1663	2	2	0	0	0	0	0	0.12	0.12	0.12	0.12	0.12	0.12	0.3	0.3	0.3	0.3	0.29	0.27	0.27	0.27	0.26	0.26	0.27	0.26	0.26	0.47	0.47	0.47	0.47	0.47	0.49	0.48	0.48	0.48	0.52	0.62	0.8	0.88
1679	2	2	0	0	0	0	0	0	0	0.3	0.3	0.3	0.3	0.3	0.3	0.34	0.39	0.4	0.4	0.4	0.4	0.4	0.4	0.57	0.57	0.57	0.57	0.57	0.57	0.57	0.67	0.74	0.74	0.74	0.88	0.88	0.93	1.04	1.04
1681	2	2	0	0	0	0	0	0	0	0	0.09	0.09	0.09	0.09	0.09	0.09	0.17	0.22	0.27	0.26	0.26	0.26	0.26	0.26	0.35	0.35	0.35	0.36	0.43	0.43	0.43	0.43	0.43	0.57	0.57	0.62	0.8	1.05	1.11
1711	2	2	0	0	0	0	0	0	0	0	0	0	0	0	0	0	0	0.08	0.08	0.08	0.08	0.08	0.08	0.08	0.08	0.22	0.22	0.22	0.22	0.23	0.23	0.6	0.6	0.6	0.6	0.87	1.05	1.2	1.3
1795	2	2	0	0	0.23	0.33	0.33	0.43	0.42	0.65	0.65	0.65	0.86	1.11	1.25	1.34	1.47	1.47	1.47	1.47	1.47	1.47	1.47	1.47	1.85	1.93	1.99	1.99	1.99	2.12	2.12	2.12	2.12	2.12	2.12	2.12	2.12	2.12	2.48
1833	2	2	0	-0.02	0	0.24	0.27	0.26	0.26	0.26	0.26	0.27	0.42	0.42	0.42	0.42	0.51	0.51	0.51	0.51	0.65	0.58	0.62	0.72	0.75	0.75	0.81	0.78	0.83	0.97	0.95	1.02	1.18	1.19	1.31	1.47	1.64	1.79	1.81
1849	2	2	0.07	0.07	0.07	0.07	0.07	0.07	0.07	0.06	0.15	0.25	0.28	0.28	0.28	0.27	0.33	0.38	0.38	0.38	0.38	0.38	0.38	0.5	0.5	0.5	0.5	0.5	0.5	0.52	0.62	0.62	0.62	0.62	0.62	0.69	0.69	0.91	1.08
2991	2	2	0.22	0.23	0.24	0.21	0.22	0.36	0.42	0.42	0.42	0.42	0.42	0.42	0.42	0.42	0.51	0.49	0.48	0.48	0.48	0.6	0.6	0.6	0.59	0.59	0.64	0.64	0.64	0.64	0.64	0.8	0.8	0.8	0.8	0.9	0.9	0.9	0.91
3009	2	2	0.16	0.16	0.16	0.16	0.16	0.16	0.16	0.31	0.31	0.31	0.4	0.4	0.4	0.4	0.42	0.44	0.52	0.52	0.52	0.52	0.52	0.61	0.61	0.61	0.61	0.68	0.68	0.68	0.68	0.68	0.81	0.81	0.81	0.89	1	1.11	1.11
3027	2	2	0.2	0.21	0.2	0.26	0.38	0.38	0.34	0.57	0.57	0.57	0.59	0.57	0.62	0.66	0.66	0.74	0.76	0.74	0.73	0.72	0.72	0.73	0.73	0.83	0.97	0.94	0.91	0.95	0.88	0.9	0.94	0.96	1.07	1.04	1.13	1.13	1.11
#Genotype: 2 = HOM
*Treatment: 1 = Vehicle; 2 = Ghrelin

## Sheet: Fig 6C
ID	Genotype #	Ghrelin Treatment *	pAMPK/AMPK (fold difference to WT-Vehicle)
2841	1	1	1.08419
2861	1	1	1.30049
2927	1	1	0.895498
2951	1	1	0.626039
2977	1	1	1.3799
2989	1	1	0.713884
2851	1	2	1.99262
2877	1	2	1.32224
2931	1	2	1.41143
2955	1	2	1.40769
2959	1	2	1.70485
3001	1	2	1.16932
2907	2	1	0.691609
2941	2	1	0.471447
2961	2	1	1.0569
2999	2	1	0.914676
3015	2	1	0.749386
2833	2	2	2.725
2921	2	2	2.743
2943	2	2	1.42538
2991	2	2	1.6476
3009	2	2	2.60438
#Genotype: 1 = WT; 2 = HOM
*Treatment: 1 = Vehicle; 2 = Ghrelin

## Sheet: Fig 6D
Sample	Genotype#	Treatment *	pAMPK-motif/AMPK (fold difference to WT-Vehicle)
2841	1	1	1.05914
2861	1	1	1.00102
2927	1	1	1.01561
2951	1	1	1.01105
2977	1	1	1.35313
2989	1	1	0.560049
2851	1	2	0.619503
2877	1	2	0.680821
2931	1	2	0.869728
2955	1	2	1.28115
2959	1	2	0.612118
3001	1	2	0.711436
2907	2	1	0.960212
2941	2	1	1.40746
2961	2	1	0.936532
2999	2	1	1.41401
3015	2	1	1.17032
2833	2	2	1.62344
2921	2	2	1.44859
2943	2	2	1.41418
2991	2	2	1.99152
3009	2	2	1.74863
3019	2	2	1.41003
#Genotype: 1 = WT; 2 = HOM
*Treatment: 1 = Vehicle; 2 = Ghrelin

## Sheet: Fig 6 Suppl 1A
ID	Genotype #	Ghrelin Treatment *	24h_FI
1775	1	1	No data, dysfunctional scale
1791	1	1	Spilled food
1805	1	1	3.54
1817	1	1	3
1825	1	1	2.71
1831	1	1	3.51
2951	1	1	3.05
2977	1	1	2.95
2989	1	1	2.63
3025	1	1	3.21
1761	1	2	3.99
1783	1	2	3.24
1793	1	2	2.34
1815	1	2	3.9
1829	1	2	3.74
1845	1	2	3.38
1851	1	2	2.61
2959	1	2	2.94
3001	1	2	2.19
3003	1	2	2.56
1669	2	1	2.96
1697	2	1	2.85
1703	2	1	3.63
1769	2	1	2.84
1789	2	1	3.63
1819	2	1	2.25
1853	2	1	4.2
2961	2	1	3.92
2999	2	1	2.59
3015	2	1	3.26
3023	2	1	3.36
1663	2	2	4.12
1679	2	2	2.99
1681	2	2	3.11
1711	2	2	3.88
1795	2	2	3.45
1833	2	2	4.06
1849	2	2	3.18
2991	2	2	2.74
3009	2	2	3.41
3027	2	2	3.38
#Genotype: 1 = WT; 2 = HOM
*Ghrelin Treatment: 1 = Vehicle; 2 = Ghrelin

## Sheet: Fig 6 Suppl 1B
ID	Genotype #	Ghrelin Treatment *	24h_BW_Change_g
1775	1	1	-0.65
1791	1	1	0.28
1805	1	1	0.05
1817	1	1	-0.54
1825	1	1	-0.22
1831	1	1	-0.03
2951	1	1	0.08
2977	1	1	-0.55
2989	1	1	-0.74
3025	1	1	0.3
1761	1	2	0.02
1783	1	2	0.22
1793	1	2	-0.45
1815	1	2	-0.02
1829	1	2	0.2
1845	1	2	0.23
1851	1	2	-0.02
2959	1	2	-0.35
3001	1	2	-0.72
3003	1	2	-0.23
1669	2	1	0.34
1697	2	1	-0.22
1703	2	1	0.15
1769	2	1	-0.14
1789	2	1	-0.39
1819	2	1	-0.38
1853	2	1	0.16
2961	2	1	-0.1
2999	2	1	-0.23
3015	2	1	-0.18
3023	2	1	0.03
1663	2	2	0.31
1679	2	2	0.27
1681	2	2	0.37
1711	2	2	0.63
1795	2	2	-0.39
1833	2	2	0.54
1849	2	2	0.13
2991	2	2	-0.39
3009	2	2	0.19
3027	2	2	-0.38
#Genotype: 1 = WT; 2 = HOM
*Ghrelin Treatment: 1 = Vehicle; 2 = Ghrelin

## Sheet: Fig 6 Suppl 1C
ID	Genotype #	Ghrelin Treatment *	BW	TEE_1	TEE_2	TEE_3	TEE_4	TEE_5	TEE_6	TEE_7	TEE_8	TEE_9	TEE_10	TEE_11	TEE_12	TEE_13	TEE_14	TEE_15	TEE_16	TEE_17	TEE_18	TEE_19	TEE_20	TEE_21	TEE_22	TEE_23	TEE_24	TEE_25	TEE_26	TEE_27	TEE_28	TEE_29	TEE_30	TEE_31	TEE_32	TEE_33	TEE_34	TEE_35	TEE_36	TEE_37	TEE_38	TEE_39	TEE_40	TEE_41	TEE_42	TEE_43	TEE_44	TEE_45	TEE_46
1775	1	1	37.31	0.610503	0.503129	0.401182	0.407563	0.409255	0.414133	0.406349	0.406391	0.676607	0.517451	0.393637	0.337156	0.368826	0.305769	0.40091	0.416408	0.368824	0.365475	0.556809	0.503409	0.373594	0.366916	0.380495	0.357577	0.372411	0.336945	0.33534	0.369024	0.409387	0.448943	0.365859	0.361603	0.371034	0.63424	0.57525	0.559616	0.472397	0.389468	0.375254	0.610561	0.677814	0.645327	0.640871	0.449056	0.347964	0.379856
1791	1	1	34.01	0.470514	0.381262	0.346346	0.362736	0.372995	0.433047	0.403317	0.336693	0.423147	0.376412	0.341737	0.357797	0.533614	0.604521	0.381489	0.311209	0.319405	0.382439	0.310385	0.303699	0.306298	0.339079	0.580552	0.402853	0.292711	0.316843	0.302026	0.417791	0.301691	0.306136	0.467452	0.396182	0.36042	0.481811	0.564271	0.610986	0.572468	0.60403	0.579567	0.549419	0.314344	0.300639	0.317194	0.297818	0.289848	0.314763
1805	1	1	34.78	0.561328	0.432227	0.438317	0.533847	0.410268	0.394622	0.392602	0.405236	0.394477	0.369277	0.404633	0.415147	0.440905	0.281278	0.519301	0.404719	0.382064	0.399624	0.376003	0.382454	0.53567	0.423819	0.383963	0.39077	0.355801	0.389233	0.561104	0.428653	0.388306	0.378616	0.398	0.414064	0.584725	0.50467	0.689717	0.667128	0.596276	0.50718	0.650635	0.598622	0.609989	0.645927	0.405622	0.396602	0.532184	0.652151
1817	1	1	28.31	0.365155	0.380146	0.379395	0.362011	0.337299	0.338247	0.343897	0.297025	0.350779	0.539506	0.30414	0.34397	0.343451	0.613067	0.469288	0.351726	0.369835	0.332702	0.333294	0.363815	0.458159	0.324871	0.415294	0.509545	0.350424	0.341574	0.363409	0.327329	0.393312	0.543867	0.333604	0.373614	0.576428	0.705168	0.631857	0.355713	0.575036	0.682973	0.720367	0.706093	0.544811	0.304063	0.556636	0.332708	0.344704	0.447117
1825	1	1	37.2	0.615677	0.482889	0.382064	0.403031	0.394243	0.422822	0.380839	0.349275	0.599186	0.433896	0.309985	0.345273	0.345084	0.488609	0.531064	0.367119	0.399458	0.496504	0.342971	0.557788	0.407943	0.38355	0.399441	0.380335	0.48804	0.543354	0.378582	0.36356	0.368737	0.497151	0.485089	0.58981	0.333467	0.432899	0.581582	0.455617	0.667911	0.500845	0.39092	0.363884	0.655755	0.403643	0.360825	0.415273	0.33812	0.360484
1831	1	1	31.9	0.592455	0.431043	0.336184	0.314953	0.363221	0.394941	0.329136	0.430515	0.398786	0.292208	0.306723	0.373795	0.419783	0.364936	0.303515	0.320081	0.336485	0.315816	0.310104	0.50895	0.31241	0.329332	0.334077	0.321615	0.421703	0.427012	0.317263	0.33685	0.327536	0.374246	0.332786	0.433354	0.430343	0.577498	0.554811	0.307717	0.550273	0.384412	0.341094	0.403573	0.362859	0.431074	0.456267	0.55185	0.457405	0.301906
2951	1	1	28.39	0.688961	0.446488	0.452104	0.548737	0.527165	0.428227	0.4711	0.481712	0.403284	0.465431	0.433636	0.443224	0.436623	0.468295	0.551885	0.41861	0.416017	0.421934	0.46983	0.409361	0.399761	0.454416	0.404713	0.547242	0.419408	0.389302	0.370817	0.405794	0.362327	0.387966	0.437927	0.466659	0.379116	0.361944	0.378533	0.372254	0.444454	0.570333	0.562607	0.525086	0.407216	0.432587	0.520812	0.608065	0.509493	0.434864
2977	1	1	34.96	0.575276	0.403392	0.316992	0.342396	0.344929	0.344651	0.355207	0.421575	0.362439	0.443819	0.348271	0.316652	0.291617	0.298139	0.494916	0.303811	0.301518	0.322408	0.46272	0.300339	0.287146	0.335635	0.335537	0.429996	0.337455	0.314124	0.292182	0.316596	0.318118	0.311271	0.439328	0.274192	0.31419	0.34369	0.456907	0.379258	0.529103	0.583589	0.575237	0.587558	0.555254	0.418684	0.548936	0.363127	0.335966	0.346842
2989	1	1	33.68	0.358855	0.374351	0.348073	0.333693	0.33658	0.380615	0.344689	0.3499	0.36408	0.35855	0.36547	0.338133	0.331691	0.352323	0.509817	0.418269	0.291502	0.33482	0.304659	0.282222	0.307371	0.296082	0.307403	0.452899	0.334678	0.322989	0.306009	0.292768	0.380282	0.277394	0.30469	0.291132	0.314989	0.402556	0.427982	0.309321	0.359425	0.419922	0.567338	0.532518	0.511787	0.465803	0.441951	0.315965	0.484345	0.480933
3025	1	1	30.69	0.504296	0.292772	0.391908	0.452768	0.337355	0.5965	0.480809	0.256957	0.290606	0.332525	0.270624	0.44845	0.276036	0.309839	0.569093	0.465761	0.263867	0.328643	0.289528	0.499682	0.284544	0.306106	0.354725	0.31835	0.271178	0.363837	0.365457	0.346674	0.341431	0.331236	0.424142	0.331074	0.344046	0.394579	0.439068	0.650174	0.608539	0.624415	0.566593	0.56962	0.550907	0.306315	0.506462	0.315219	0.548883	0.58032
1761	1	2	27.7	0.391873	0.33744	0.330547	0.426949	0.522682	0.48859	0.313643	0.325532	0.347971	0.326214	0.348498	0.352348	0.373306	0.624712	0.482577	0.341158	0.352066	0.326637	0.359847	0.334121	0.365453	0.396105	0.330502	0.34337	0.341142	0.462464	0.463418	0.357115	0.351279	0.361721	0.341419	0.495348	0.469173	0.391009	0.643342	0.600709	0.532664	0.49924	0.552093	0.51731	0.444987	0.436531	0.598386	0.613723	0.459972	0.568885
1783	1	2	30.94	0.550872	0.39678	0.343793	0.332953	0.504156	0.402921	0.337813	0.370614	0.356061	0.317834	0.335307	0.371214	0.417602	0.314359	0.508914	0.308185	0.306995	0.345453	0.315467	0.324674	0.348539	0.3866	0.361021	0.353964	0.394101	0.362775	0.349161	0.331239	0.363147	0.485354	0.344793	0.341703	0.429385	0.401149	0.551383	0.605963	0.613211	0.54483	0.308314	0.511491	0.580053	0.515608	0.398007	0.372945	0.473651	0.41434
1793	1	2	32.72	0.453262	0.408397	0.392691	0.353907	0.337007	0.343564	0.545449	0.338839	0.36676	0.341885	0.346377	0.337018	0.325573	0.535903	0.494134	0.341014	0.342491	0.332338	0.366048	0.3131	0.433896	0.31236	0.318608	0.351926	0.327098	0.333036	0.479805	0.370054	0.359849	0.371963	0.390927	0.335209	0.500108	0.496298	0.331655	0.45536	0.577465	0.445273	0.364738	0.452346	0.534915	0.511281	0.484898	0.383497	0.347545	0.334117
1815	1	2	33.62	0.513806	0.384892	0.352378	0.351334	0.329783	0.328346	0.360206	0.548152	0.409675	0.302023	0.294481	0.3151	0.412923	0.396539	0.445916	0.307737	0.327414	0.310248	0.322271	0.334832	0.304878	0.450571	0.390606	0.365284	0.330616	0.360191	0.298084	0.316349	0.468684	0.373819	0.350155	0.403071	0.306358	0.533677	0.50685	0.342947	0.376265	0.329091	0.525177	0.606935	0.559228	0.530138	0.522625	0.316045	0.378312	0.272333
1829	1	2	35.28	0.532004	0.34207	0.387575	0.482188	0.408075	0.340938	0.344196	0.33246	0.493179	0.379909	0.351958	0.351181	0.378285	0.614027	0.550814	0.361382	0.359727	0.320999	0.502456	0.35046	0.376358	0.539502	0.369618	0.356568	0.375821	0.40822	0.538853	0.375878	0.386716	0.361195	0.574834	0.396402	0.536321	0.631008	0.636238	0.679582	0.680589	0.557224	0.504042	0.546411	0.67246	0.389079	0.67218	0.609316	0.53079	0.357105
1845	1	2	38.05	0.482858	0.41539	0.393671	0.411612	0.378053	0.390212	0.656505	0.507568	0.387108	0.413527	0.366623	0.395069	0.373122	0.661515	0.623103	0.458457	0.385614	0.381111	0.343212	0.408765	0.595856	0.369827	0.409852	0.3653	0.395076	0.381034	0.393317	0.363442	0.414334	0.390404	0.410911	0.414932	0.699712	0.690684	0.688294	0.707659	0.723753	0.564568	0.40649	0.400425	0.380989	0.584242	0.650953	0.711585	0.635866	0.395604
1851	1	2	33.17	0.568753	0.387014	0.348623	0.381457	0.38356	0.297623	0.465306	0.33632	0.344197	0.343032	0.343034	0.389659	0.398643	0.28803	0.298034	0.347343	0.358126	0.47889	0.327831	0.389371	0.339056	0.331158	0.346586	0.34736	0.443566	0.364478	0.346552	0.353944	0.325584	0.410429	0.336915	0.463151	0.384942	0.44727	0.608988	0.645474	0.598018	0.421145	0.277263	0.377665	0.577332	0.493642	0.563906	0.475764	0.4925	0.315993
2959	1	2	32.26	0.479848	0.401075	0.389501	0.414928	0.49923	0.384912	0.41751	0.434895	0.388998	0.392746	0.360232	0.365134	0.378411	0.555835	0.485489	0.413028	0.383032	0.351094	0.346758	0.466843	0.339233	0.352741	0.363723	0.312039	0.309954	0.392728	0.535736	0.31805	0.307726	0.323485	0.351912	0.343959	0.343783	0.354808	0.39379	0.36989	0.343577	0.546566	0.564033	0.423402	0.453005	0.391161	0.367381	0.518338	0.375635	0.385554
3001	1	2	33.69	0.469824	0.300149	0.389483	0.340729	0.419369	0.32384	0.321934	0.322546	0.34639	0.34522	0.439168	0.311635	0.312507	0.34317	0.410468	0.261495	0.309254	0.356751	0.433459	0.309034	0.370642	0.298258	0.316497	0.418439	0.317435	0.349142	0.302342	0.439047	0.434576	0.267399	0.329308	0.318424	0.403539	0.305249	0.419218	0.332549	0.406245	0.418406	0.605872	0.58415	0.453277	0.290248	0.360529	0.381708	0.426462	0.334265
3003	1	2	34.94	0.36538	0.350732	0.385081	0.396232	0.369201	0.452941	0.305194	0.57578	0.484406	0.27867	0.36382	0.34953	0.298498	0.372202	0.489372	0.376751	0.315802	0.359879	0.343613	0.334569	0.509031	0.32127	0.350038	0.312385	0.356374	0.461333	0.347814	0.381229	0.353931	0.321805	0.337973	0.361169	0.386335	0.411131	0.534643	0.384583	0.562184	0.516463	0.645292	0.598095	0.330468	0.452689	0.629091	0.612657	0.338887	0.323821
#Genotype: 1 = WT
*Ghrelin Treatment: 1 = Vehicle; 2 = Ghrelin
[truncated: 35 more columns]

## Sheet: Fig 6 Suppl 1D
ID	Genotype #	Ghrelin Treatment *	BW	TEE_1	TEE_2	TEE_3	TEE_4	TEE_5	TEE_6	TEE_7	TEE_8	TEE_9	TEE_10	TEE_11	TEE_12	TEE_13	TEE_14	TEE_15	TEE_16	TEE_17	TEE_18	TEE_19	TEE_20	TEE_21	TEE_22	TEE_23	TEE_24	TEE_25	TEE_26	TEE_27	TEE_28	TEE_29	TEE_30	TEE_31	TEE_32	TEE_33	TEE_34	TEE_35	TEE_36	TEE_37	TEE_38	TEE_39	TEE_40	TEE_41	TEE_42	TEE_43	TEE_44	TEE_45	TEE_46
1669	2	1	26.65	0.466416	0.405182	0.376121	0.34957	0.379702	0.464687	0.313113	0.352122	0.341352	0.327955	0.326392	0.355685	0.318391	0.50439	0.360283	0.540116	0.402624	0.3349	0.309031	0.321416	0.311549	0.322682	0.373717	0.538455	0.374207	0.360016	0.369685	0.331905	0.3445	0.457981	0.523099	0.360741	0.417768	0.577676	0.401655	0.577034	0.606241	0.393609	0.624601	0.550591	0.395314	0.563592	0.547889	0.379821	0.576754	0.424299
1697	2	1	27.28	0.411543	0.31863	0.303727	0.34661	0.284766	0.293129	0.368665	0.281529	0.307429	0.29334	0.26924	0.266194	0.240526	0.484993	0.40213	0.29279	0.264964	0.29889	0.291069	0.359558	0.300855	0.314233	0.286422	0.298585	0.415504	0.301324	0.313515	0.307322	0.232168	0.353409	0.321682	0.288661	0.461624	0.308101	0.428375	0.491048	0.465923	0.31154	0.32414	0.440825	0.500611	0.476577	0.320768	0.512293	0.456727	0.304402
1703	2	1	30.81	0.288726	0.318825	0.437607	0.390286	0.297464	0.30944	0.294894	0.333784	0.322084	0.264472	0.316511	0.453827	0.278354	0.307742	0.320898	0.460893	0.382297	0.298496	0.302716	0.345674	0.31441	0.270312	0.328394	0.506719	0.312188	0.301091	0.307775	0.362024	0.33338	0.296786	0.410916	0.518598	0.435027	0.411172	0.581737	0.580768	0.584809	0.38555	0.4065	0.578871	0.534501	0.346005	0.471518	0.342275	0.341018	0.506406
1769	2	1	31.41	0.51347	0.406245	0.349105	0.387267	0.381788	0.528076	0.416826	0.398794	0.361707	0.313288	0.357791	0.339966	0.434238	0.577246	0.514837	0.402311	0.376969	0.456694	0.309856	0.352317	0.342774	0.353724	0.382964	0.335851	0.493656	0.378747	0.348686	0.419519	0.386512	0.369367	0.411821	0.565381	0.392192	0.495751	0.532585	0.617307	0.390686	0.409785	0.464396	0.537465	0.439107	0.432611	0.417971	0.548716	0.697843	0.634536
1789	2	1	31.77	0.496968	0.311505	0.292826	0.342691	0.341731	0.46502	0.432385	0.318205	0.28364	0.325522	0.358128	0.347468	0.476478	0.532605	0.40817	0.321535	0.358766	0.34267	0.311526	0.309701	0.350324	0.339923	0.491812	0.331171	0.338689	0.345764	0.342259	0.441265	0.360297	0.368924	0.360529	0.360322	0.542868	0.551056	0.517454	0.377414	0.470061	0.468191	0.526868	0.590845	0.503996	0.537188	0.369876	0.487377	0.498171	0.384707
1819	2	1	34.08	0.548081	0.500959	0.439083	0.472942	0.383556	0.346905	0.404565	0.334261	0.496015	0.312572	0.350785	0.445378	0.336945	0.625382	0.520823	0.392258	0.397314	0.384376	0.422731	0.381085	0.392369	0.472639	0.38387	0.35085	0.472457	0.389599	0.340758	0.330965	0.456516	0.377445	0.418366	0.556365	0.368669	0.405486	0.540963	0.439424	0.651349	0.607788	0.572784	0.336952	0.340845	0.407642	0.662781	0.602992	0.548899	0.534919
1853	2	1	26.24	0.458491	0.378236	0.359243	0.350147	0.472852	0.372478	0.493187	0.391983	0.373378	0.348748	0.324414	0.570886	0.389044	0.520258	0.484051	0.386536	0.364108	0.371005	0.373382	0.476244	0.353789	0.367205	0.3496	0.336776	0.428947	0.358988	0.40862	0.352728	0.490794	0.362576	0.339058	0.431815	0.507584	0.542348	0.431966	0.544414	0.561125	0.570062	0.354313	0.379069	0.555439	0.398687	0.372812	0.484571	0.364198	0.563429
2961	2	1	29.12	0.595857	0.339519	0.340947	0.35699	0.322182	0.468692	0.335458	0.338848	0.306218	0.293967	0.507378	0.270015	0.342465	0.278853	0.454695	0.212045	0.300194	0.299669	0.328356	0.405944	0.366911	0.288423	0.297472	0.274651	0.29006	0.320313	0.359328	0.311353	0.309964	0.412986	0.484461	0.271797	0.332508	0.292018	0.335772	0.414665	0.305345	0.472959	0.493955	0.468409	0.372205	0.462635	0.593942	0.349766	0.51587	0.336246
2999	2	1	35.67	0.443807	0.347181	0.402869	0.384435	0.41219	0.381815	0.354293	0.366125	0.388538	0.345752	0.343694	0.443342	0.427219	0.43262	0.35372	0.357344	0.413327	0.363192	0.388902	0.33225	0.376978	0.590742	0.34436	0.332047	0.334272	0.338852	0.366032	0.340852	0.376202	0.367824	0.408988	0.417101	0.408437	0.316386	0.371111	0.496582	0.448235	0.591005	0.528911	0.465979	0.42507	0.404041	0.502999	0.643306	0.600805	0.354819
3015	2	1	33.05	0.336056	0.364961	0.424926	0.327641	0.30992	0.351784	0.350125	0.463263	0.354447	0.333612	0.353394	0.340833	0.287427	0.388566	0.508359	0.274958	0.357504	0.352703	0.313833	0.291527	0.429473	0.279913	0.320815	0.305854	0.352664	0.535268	0.364059	0.319613	0.303142	0.321807	0.448898	0.299565	0.32207	0.333994	0.33082	0.428122	0.444526	0.523033	0.506644	0.595467	0.53081	0.513256	0.34267	0.498557	0.376306	0.345413
3023	2	1	32.87	0.453589	0.294808	0.328642	0.336905	0.360764	0.344707	0.274403	0.593194	0.398402	0.317559	0.319375	0.347943	0.34832	0.324994	0.537972	0.352692	0.257588	0.332506	0.332108	0.495453	0.289327	0.301124	0.302564	0.342218	0.489283	0.282608	0.319129	0.319215	0.405396	0.316729	0.33962	0.309253	0.337169	0.48	0.452149	0.319893	0.414396	0.458049	0.448867	0.577943	0.39287	0.565941	0.525842	0.357446	0.464999	0.404758
1663	2	2	27.41	0.411999	0.28738	0.322309	0.311364	0.325045	0.519289	0.296763	0.32612	0.340649	0.31919	0.399741	0.336465	0.30204	0.317088	0.306975	0.448226	0.314034	0.317389	0.271738	0.283641	0.36178	0.307529	0.252702	0.300901	0.46414	0.248399	0.302821	0.254101	0.292409	0.275812	0.423858	0.297277	0.353021	0.469759	0.317546	0.532774	0.43359	0.462691	0.391625	0.428468	0.475301	0.442986	0.392182	0.447674	0.592191	0.56261
1679	2	2	28.55	0.348265	0.292982	0.281221	0.299903	0.294483	0.305097	0.490894	0.372041	0.287205	0.292294	0.285091	0.266826	0.304465	0.433532	0.315958	0.457258	0.286883	0.289595	0.246847	0.326777	0.277078	0.505734	0.302326	0.298239	0.284677	0.316501	0.314685	0.324228	0.447101	0.307183	0.320986	0.343324	0.363657	0.482162	0.495982	0.465476	0.415243	0.351477	0.460151	0.472909	0.421758	0.384053	0.492789	0.389105	0.579661	0.438898
1681	2	2	30.03	0.24987	0.305797	0.328513	0.363949	0.298316	0.299693	0.285442	0.36664	0.3899	0.330276	0.286821	0.294989	0.277881	0.368175	0.358951	0.503393	0.420283	0.250272	0.266682	0.273264	0.258551	0.330226	0.357183	0.268974	0.294517	0.29231	0.416923	0.341507	0.29101	0.266664	0.299969	0.424706	0.30785	0.502039	0.59643	0.568526	0.603306	0.580139	0.55736	0.621984	0.62706	0.606924	0.605629	0.526438	0.466998	0.51469
1711	2	2	30.13	0.350887	0.337965	0.368962	0.357059	0.34719	0.359285	0.262723	0.330588	0.35754	0.368665	0.33779	0.335665	0.30084	0.360841	0.347886	0.453811	0.3322	0.371532	0.33501	0.457754	0.322721	0.334721	0.423851	0.473418	0.329012	0.343989	0.354828	0.471625	0.435929	0.535652	0.326461	0.393134	0.517655	0.611354	0.636233	0.583892	0.578954	0.47812	0.359753	0.557162	0.680221	0.62555	0.587203	0.385414	0.420003	0.351075
1795	2	2	33.69	0.535423	0.454942	0.506601	0.481632	0.418673	0.468374	0.496662	0.602652	0.440075	0.490808	0.65771	0.694047	0.620426	0.77098	0.586632	0.564353	0.364543	0.371076	0.44368	0.511792	0.419287	0.388455	0.638866	0.652631	0.602424	0.314682	0.399341	0.502874	0.377203	0.383915	0.334802	0.335433	0.436702	0.3813	0.384002	0.533815	0.655496	0.619298	0.625025	0.592931	0.51621	0.302193	0.407604	0.362071	0.325505	0.504153
1833	2	2	35.05	0.320501	0.315211	0.32723	0.611739	0.4665	0.346791	0.346942	0.375053	0.341451	0.323946	0.551416	0.389855	0.376663	0.560123	0.425846	0.3826	0.375848	0.370007	0.533415	0.385872	0.386375	0.452868	0.391014	0.490361	0.34268	0.388665	0.390042	0.376317	0.426112	0.506567	0.595979	0.390385	0.617186	0.627894	0.663374	0.629246	0.461438	0.450955	0.667864	0.661391	0.65461	0.596439	0.39374	0.415659	0.465397	0.474472
1849	2	2	28.06	0.551615	0.364041	0.305904	0.358246	0.368841	0.346963	0.372648	0.373188	0.657299	0.520685	0.380481	0.354922	0.350261	0.630301	0.570962	0.504566	0.369204	0.362341	0.347098	0.345291	0.365198	0.514133	0.341313	0.3702	0.317199	0.35111	0.364003	0.471367	0.493945	0.352763	0.37931	0.383714	0.362779	0.579786	0.582715	0.624754	0.577836	0.381099	0.381294	0.322774	0.595316	0.622911	0.66072	0.637697	0.488562	0.535091
2991	2	2	31.44	0.509819	0.296136	0.349606	0.298558	0.334552	0.425406	0.460551	0.290146	0.344611	0.318648	0.291849	0.402664	0.292841	0.350961	0.337366	0.275681	0.33135	0.287133	0.407333	0.229148	0.284235	0.300162	0.303485	0.378812	0.284868	0.267933	0.288844	0.278724	0.285078	0.303098	0.308105	0.276597	0.302697	0.383091	0.313813	0.324384	0.351009	0.41877	0.335269	0.506849	0.45991	0.524708	0.373587	0.288174	0.34776	0.349376
3009	2	2	31.12	0.446995	0.248028	0.298861	0.4581	0.29533	0.268954	0.285488	0.274419	0.309648	0.266863	0.410543	0.421433	0.241237	0.319194	0.458031	0.243369	0.295252	0.329376	0.28064	0.276079	0.344224	0.441632	0.284077	0.289408	0.304459	0.393925	0.296931	0.301675	0.283871	0.319796	0.354487	0.308371	0.318308	0.322772	0.385656	0.440236	0.366445	0.357506	0.615332	0.505958	0.386243	0.441992	0.431721	0.593392	0.561503	0.467232
3027	2	2	35.01	0.446016	0.372631	0.411376	0.684726	0.337848	0.418591	0.419922	0.442564	0.426424	0.41598	0.425494	0.572888	0.399859	0.447431	0.630136	0.487261	0.304798	0.40213	0.388782	0.350262	0.401384	0.346532	0.366067	0.571653	0.592075	0.437684	0.383525	0.390733	0.377398	0.398458	0.420955	0.615919	0.339061	0.375725	0.535334	0.413783	0.637802	0.680362	0.655579	0.666749	0.635724	0.545713	0.363167	0.393076	0.556331	0.38077
#Genotype: 2 = HOM
*Ghrelin Treatment: 1 = Vehicle; 2 = Ghrelin
[truncated: 35 more columns]

## Sheet: Fig 6 Suppl 1E
ID	Genotype #	Ghrelin Treatment *	BW	TEE_1	TEE_2	TEE_3	TEE_4	TEE_5	TEE_6	TEE_7	TEE_8	TEE_9	TEE_10	TEE_11	TEE_12	TEE_13	TEE_14	TEE_15	TEE_16	TEE_17	TEE_18	TEE_19	TEE_20	TEE_21	TEE_22	TEE_23	TEE_24	TEE_25	TEE_26	TEE_27	TEE_28	TEE_29	TEE_30	TEE_31	TEE_32	TEE_33	TEE_34	TEE_35	TEE_36	TEE_37
1775	1	1	37.31	0.610503	0.503129	0.401182	0.407563	0.409255	0.414133	0.406349	0.406391	0.676607	0.517451	0.393637	0.337156	0.368826	0.305769	0.40091	0.416408	0.368824	0.365475	0.556809	0.503409	0.373594	0.366916	0.380495	0.357577	0.372411	0.336945	0.33534	0.369024	0.409387	0.448943	0.365859	0.361603	0.371034	0.63424	0.57525	0.559616	0.472397
1791	1	1	34.01	0.470514	0.381262	0.346346	0.362736	0.372995	0.433047	0.403317	0.336693	0.423147	0.376412	0.341737	0.357797	0.533614	0.604521	0.381489	0.311209	0.319405	0.382439	0.310385	0.303699	0.306298	0.339079	0.580552	0.402853	0.292711	0.316843	0.302026	0.417791	0.301691	0.306136	0.467452	0.396182	0.36042	0.481811	0.564271	0.610986	0.572468
1805	1	1	34.78	0.561328	0.432227	0.438317	0.533847	0.410268	0.394622	0.392602	0.405236	0.394477	0.369277	0.404633	0.415147	0.440905	0.281278	0.519301	0.404719	0.382064	0.399624	0.376003	0.382454	0.53567	0.423819	0.383963	0.39077	0.355801	0.389233	0.561104	0.428653	0.388306	0.378616	0.398	0.414064	0.584725	0.50467	0.689717	0.667128	0.596276
1817	1	1	28.31	0.365155	0.380146	0.379395	0.362011	0.337299	0.338247	0.343897	0.297025	0.350779	0.539506	0.30414	0.34397	0.343451	0.613067	0.469288	0.351726	0.369835	0.332702	0.333294	0.363815	0.458159	0.324871	0.415294	0.509545	0.350424	0.341574	0.363409	0.327329	0.393312	0.543867	0.333604	0.373614	0.576428	0.705168	0.631857	0.355713	0.575036
1825	1	1	37.2	0.615677	0.482889	0.382064	0.403031	0.394243	0.422822	0.380839	0.349275	0.599186	0.433896	0.309985	0.345273	0.345084	0.488609	0.531064	0.367119	0.399458	0.496504	0.342971	0.557788	0.407943	0.38355	0.399441	0.380335	0.48804	0.543354	0.378582	0.36356	0.368737	0.497151	0.485089	0.58981	0.333467	0.432899	0.581582	0.455617	0.667911
1831	1	1	31.9	0.592455	0.431043	0.336184	0.314953	0.363221	0.394941	0.329136	0.430515	0.398786	0.292208	0.306723	0.373795	0.419783	0.364936	0.303515	0.320081	0.336485	0.315816	0.310104	0.50895	0.31241	0.329332	0.334077	0.321615	0.421703	0.427012	0.317263	0.33685	0.327536	0.374246	0.332786	0.433354	0.430343	0.577498	0.554811	0.307717	0.550273
2951	1	1	28.39	0.688961	0.446488	0.452104	0.548737	0.527165	0.428227	0.4711	0.481712	0.403284	0.465431	0.433636	0.443224	0.436623	0.468295	0.551885	0.41861	0.416017	0.421934	0.46983	0.409361	0.399761	0.454416	0.404713	0.547242	0.419408	0.389302	0.370817	0.405794	0.362327	0.387966	0.437927	0.466659	0.379116	0.361944	0.378533	0.372254	0.444454
2977	1	1	34.96	0.575276	0.403392	0.316992	0.342396	0.344929	0.344651	0.355207	0.421575	0.362439	0.443819	0.348271	0.316652	0.291617	0.298139	0.494916	0.303811	0.301518	0.322408	0.46272	0.300339	0.287146	0.335635	0.335537	0.429996	0.337455	0.314124	0.292182	0.316596	0.318118	0.311271	0.439328	0.274192	0.31419	0.34369	0.456907	0.379258	0.529103
2989	1	1	33.68	0.358855	0.374351	0.348073	0.333693	0.33658	0.380615	0.344689	0.3499	0.36408	0.35855	0.36547	0.338133	0.331691	0.352323	0.509817	0.418269	0.291502	0.33482	0.304659	0.282222	0.307371	0.296082	0.307403	0.452899	0.334678	0.322989	0.306009	0.292768	0.380282	0.277394	0.30469	0.291132	0.314989	0.402556	0.427982	0.309321	0.359425
3025	1	1	30.69	0.504296	0.292772	0.391908	0.452768	0.337355	0.5965	0.480809	0.256957	0.290606	0.332525	0.270624	0.44845	0.276036	0.309839	0.569093	0.465761	0.263867	0.328643	0.289528	0.499682	0.284544	0.306106	0.354725	0.31835	0.271178	0.363837	0.365457	0.346674	0.341431	0.331236	0.424142	0.331074	0.344046	0.394579	0.439068	0.650174	0.608539
1761	1	2	27.7	0.391873	0.33744	0.330547	0.426949	0.522682	0.48859	0.313643	0.325532	0.347971	0.326214	0.348498	0.352348	0.373306	0.624712	0.482577	0.341158	0.352066	0.326637	0.359847	0.334121	0.365453	0.396105	0.330502	0.34337	0.341142	0.462464	0.463418	0.357115	0.351279	0.361721	0.341419	0.495348	0.469173	0.391009	0.643342	0.600709	0.532664
1783	1	2	30.94	0.550872	0.39678	0.343793	0.332953	0.504156	0.402921	0.337813	0.370614	0.356061	0.317834	0.335307	0.371214	0.417602	0.314359	0.508914	0.308185	0.306995	0.345453	0.315467	0.324674	0.348539	0.3866	0.361021	0.353964	0.394101	0.362775	0.349161	0.331239	0.363147	0.485354	0.344793	0.341703	0.429385	0.401149	0.551383	0.605963	0.613211
1793	1	2	32.72	0.453262	0.408397	0.392691	0.353907	0.337007	0.343564	0.545449	0.338839	0.36676	0.341885	0.346377	0.337018	0.325573	0.535903	0.494134	0.341014	0.342491	0.332338	0.366048	0.3131	0.433896	0.31236	0.318608	0.351926	0.327098	0.333036	0.479805	0.370054	0.359849	0.371963	0.390927	0.335209	0.500108	0.496298	0.331655	0.45536	0.577465
1815	1	2	33.62	0.513806	0.384892	0.352378	0.351334	0.329783	0.328346	0.360206	0.548152	0.409675	0.302023	0.294481	0.3151	0.412923	0.396539	0.445916	0.307737	0.327414	0.310248	0.322271	0.334832	0.304878	0.450571	0.390606	0.365284	0.330616	0.360191	0.298084	0.316349	0.468684	0.373819	0.350155	0.403071	0.306358	0.533677	0.50685	0.342947	0.376265
1829	1	2	35.28	0.532004	0.34207	0.387575	0.482188	0.408075	0.340938	0.344196	0.33246	0.493179	0.379909	0.351958	0.351181	0.378285	0.614027	0.550814	0.361382	0.359727	0.320999	0.502456	0.35046	0.376358	0.539502	0.369618	0.356568	0.375821	0.40822	0.538853	0.375878	0.386716	0.361195	0.574834	0.396402	0.536321	0.631008	0.636238	0.679582	0.680589
1845	1	2	38.05	0.482858	0.41539	0.393671	0.411612	0.378053	0.390212	0.656505	0.507568	0.387108	0.413527	0.366623	0.395069	0.373122	0.661515	0.623103	0.458457	0.385614	0.381111	0.343212	0.408765	0.595856	0.369827	0.409852	0.3653	0.395076	0.381034	0.393317	0.363442	0.414334	0.390404	0.410911	0.414932	0.699712	0.690684	0.688294	0.707659	0.723753
1851	1	2	33.17	0.568753	0.387014	0.348623	0.381457	0.38356	0.297623	0.465306	0.33632	0.344197	0.343032	0.343034	0.389659	0.398643	0.28803	0.298034	0.347343	0.358126	0.47889	0.327831	0.389371	0.339056	0.331158	0.346586	0.34736	0.443566	0.364478	0.346552	0.353944	0.325584	0.410429	0.336915	0.463151	0.384942	0.44727	0.608988	0.645474	0.598018
2959	1	2	32.26	0.479848	0.401075	0.389501	0.414928	0.49923	0.384912	0.41751	0.434895	0.388998	0.392746	0.360232	0.365134	0.378411	0.555835	0.485489	0.413028	0.383032	0.351094	0.346758	0.466843	0.339233	0.352741	0.363723	0.312039	0.309954	0.392728	0.535736	0.31805	0.307726	0.323485	0.351912	0.343959	0.343783	0.354808	0.39379	0.36989	0.343577
3001	1	2	33.69	0.469824	0.300149	0.389483	0.340729	0.419369	0.32384	0.321934	0.322546	0.34639	0.34522	0.439168	0.311635	0.312507	0.34317	0.410468	0.261495	0.309254	0.356751	0.433459	0.309034	0.370642	0.298258	0.316497	0.418439	0.317435	0.349142	0.302342	0.439047	0.434576	0.267399	0.329308	0.318424	0.403539	0.305249	0.419218	0.332549	0.406245
3003	1	2	34.94	0.36538	0.350732	0.385081	0.396232	0.369201	0.452941	0.305194	0.57578	0.484406	0.27867	0.36382	0.34953	0.298498	0.372202	0.489372	0.376751	0.315802	0.359879	0.343613	0.334569	0.509031	0.32127	0.350038	0.312385	0.356374	0.461333	0.347814	0.381229	0.353931	0.321805	0.337973	0.361169	0.386335	0.411131	0.534643	0.384583	0.562184
#Genotype: 1 = WT
*Ghrelin Treatment: 1 = Vehicle; 2 = Ghrelin

## Sheet: Fig 6 Suppl 1F
ID	Genotype #	Ghrelin Treatment *	BW	TEE_1	TEE_2	TEE_3	TEE_4	TEE_5	TEE_6	TEE_7	TEE_8	TEE_9	TEE_10	TEE_11	TEE_12	TEE_13	TEE_14	TEE_15	TEE_16	TEE_17	TEE_18	TEE_19	TEE_20	TEE_21	TEE_22	TEE_23	TEE_24	TEE_25	TEE_26	TEE_27	TEE_28	TEE_29	TEE_30	TEE_31	TEE_32	TEE_33	TEE_34	TEE_35	TEE_36	TEE_37
1669	2	1	26.65	0.466416	0.405182	0.376121	0.34957	0.379702	0.464687	0.313113	0.352122	0.341352	0.327955	0.326392	0.355685	0.318391	0.50439	0.360283	0.540116	0.402624	0.3349	0.309031	0.321416	0.311549	0.322682	0.373717	0.538455	0.374207	0.360016	0.369685	0.331905	0.3445	0.457981	0.523099	0.360741	0.417768	0.577676	0.401655	0.577034	0.606241
1697	2	1	27.28	0.411543	0.31863	0.303727	0.34661	0.284766	0.293129	0.368665	0.281529	0.307429	0.29334	0.26924	0.266194	0.240526	0.484993	0.40213	0.29279	0.264964	0.29889	0.291069	0.359558	0.300855	0.314233	0.286422	0.298585	0.415504	0.301324	0.313515	0.307322	0.232168	0.353409	0.321682	0.288661	0.461624	0.308101	0.428375	0.491048	0.465923
1703	2	1	30.81	0.288726	0.318825	0.437607	0.390286	0.297464	0.30944	0.294894	0.333784	0.322084	0.264472	0.316511	0.453827	0.278354	0.307742	0.320898	0.460893	0.382297	0.298496	0.302716	0.345674	0.31441	0.270312	0.328394	0.506719	0.312188	0.301091	0.307775	0.362024	0.33338	0.296786	0.410916	0.518598	0.435027	0.411172	0.581737	0.580768	0.584809
1769	2	1	31.41	0.51347	0.406245	0.349105	0.387267	0.381788	0.528076	0.416826	0.398794	0.361707	0.313288	0.357791	0.339966	0.434238	0.577246	0.514837	0.402311	0.376969	0.456694	0.309856	0.352317	0.342774	0.353724	0.382964	0.335851	0.493656	0.378747	0.348686	0.419519	0.386512	0.369367	0.411821	0.565381	0.392192	0.495751	0.532585	0.617307	0.390686
1789	2	1	31.77	0.496968	0.311505	0.292826	0.342691	0.341731	0.46502	0.432385	0.318205	0.28364	0.325522	0.358128	0.347468	0.476478	0.532605	0.40817	0.321535	0.358766	0.34267	0.311526	0.309701	0.350324	0.339923	0.491812	0.331171	0.338689	0.345764	0.342259	0.441265	0.360297	0.368924	0.360529	0.360322	0.542868	0.551056	0.517454	0.377414	0.470061
1819	2	1	34.08	0.548081	0.500959	0.439083	0.472942	0.383556	0.346905	0.404565	0.334261	0.496015	0.312572	0.350785	0.445378	0.336945	0.625382	0.520823	0.392258	0.397314	0.384376	0.422731	0.381085	0.392369	0.472639	0.38387	0.35085	0.472457	0.389599	0.340758	0.330965	0.456516	0.377445	0.418366	0.556365	0.368669	0.405486	0.540963	0.439424	0.651349
1853	2	1	26.24	0.458491	0.378236	0.359243	0.350147	0.472852	0.372478	0.493187	0.391983	0.373378	0.348748	0.324414	0.570886	0.389044	0.520258	0.484051	0.386536	0.364108	0.371005	0.373382	0.476244	0.353789	0.367205	0.3496	0.336776	0.428947	0.358988	0.40862	0.352728	0.490794	0.362576	0.339058	0.431815	0.507584	0.542348	0.431966	0.544414	0.561125
2961	2	1	29.12	0.595857	0.339519	0.340947	0.35699	0.322182	0.468692	0.335458	0.338848	0.306218	0.293967	0.507378	0.270015	0.342465	0.278853	0.454695	0.212045	0.300194	0.299669	0.328356	0.405944	0.366911	0.288423	0.297472	0.274651	0.29006	0.320313	0.359328	0.311353	0.309964	0.412986	0.484461	0.271797	0.332508	0.292018	0.335772	0.414665	0.305345
2999	2	1	35.67	0.443807	0.347181	0.402869	0.384435	0.41219	0.381815	0.354293	0.366125	0.388538	0.345752	0.343694	0.443342	0.427219	0.43262	0.35372	0.357344	0.413327	0.363192	0.388902	0.33225	0.376978	0.590742	0.34436	0.332047	0.334272	0.338852	0.366032	0.340852	0.376202	0.367824	0.408988	0.417101	0.408437	0.316386	0.371111	0.496582	0.448235
3015	2	1	33.05	0.336056	0.364961	0.424926	0.327641	0.30992	0.351784	0.350125	0.463263	0.354447	0.333612	0.353394	0.340833	0.287427	0.388566	0.508359	0.274958	0.357504	0.352703	0.313833	0.291527	0.429473	0.279913	0.320815	0.305854	0.352664	0.535268	0.364059	0.319613	0.303142	0.321807	0.448898	0.299565	0.32207	0.333994	0.33082	0.428122	0.444526
3023	2	1	32.87	0.453589	0.294808	0.328642	0.336905	0.360764	0.344707	0.274403	0.593194	0.398402	0.317559	0.319375	0.347943	0.34832	0.324994	0.537972	0.352692	0.257588	0.332506	0.332108	0.495453	0.289327	0.301124	0.302564	0.342218	0.489283	0.282608	0.319129	0.319215	0.405396	0.316729	0.33962	0.309253	0.337169	0.48	0.452149	0.319893	0.414396
1663	2	2	27.41	0.411999	0.28738	0.322309	0.311364	0.325045	0.519289	0.296763	0.32612	0.340649	0.31919	0.399741	0.336465	0.30204	0.317088	0.306975	0.448226	0.314034	0.317389	0.271738	0.283641	0.36178	0.307529	0.252702	0.300901	0.46414	0.248399	0.302821	0.254101	0.292409	0.275812	0.423858	0.297277	0.353021	0.469759	0.317546	0.532774	0.43359
1679	2	2	28.55	0.348265	0.292982	0.281221	0.299903	0.294483	0.305097	0.490894	0.372041	0.287205	0.292294	0.285091	0.266826	0.304465	0.433532	0.315958	0.457258	0.286883	0.289595	0.246847	0.326777	0.277078	0.505734	0.302326	0.298239	0.284677	0.316501	0.314685	0.324228	0.447101	0.307183	0.320986	0.343324	0.363657	0.482162	0.495982	0.465476	0.415243
1681	2	2	30.03	0.24987	0.305797	0.328513	0.363949	0.298316	0.299693	0.285442	0.36664	0.3899	0.330276	0.286821	0.294989	0.277881	0.368175	0.358951	0.503393	0.420283	0.250272	0.266682	0.273264	0.258551	0.330226	0.357183	0.268974	0.294517	0.29231	0.416923	0.341507	0.29101	0.266664	0.299969	0.424706	0.30785	0.502039	0.59643	0.568526	0.603306
1711	2	2	30.13	0.350887	0.337965	0.368962	0.357059	0.34719	0.359285	0.262723	0.330588	0.35754	0.368665	0.33779	0.335665	0.30084	0.360841	0.347886	0.453811	0.3322	0.371532	0.33501	0.457754	0.322721	0.334721	0.423851	0.473418	0.329012	0.343989	0.354828	0.471625	0.435929	0.535652	0.326461	0.393134	0.517655	0.611354	0.636233	0.583892	0.578954
1795	2	2	33.69	0.535423	0.454942	0.506601	0.481632	0.418673	0.468374	0.496662	0.602652	0.440075	0.490808	0.65771	0.694047	0.620426	0.77098	0.586632	0.564353	0.364543	0.371076	0.44368	0.511792	0.419287	0.388455	0.638866	0.652631	0.602424	0.314682	0.399341	0.502874	0.377203	0.383915	0.334802	0.335433	0.436702	0.3813	0.384002	0.533815	0.655496
1833	2	2	35.05	0.320501	0.315211	0.32723	0.611739	0.4665	0.346791	0.346942	0.375053	0.341451	0.323946	0.551416	0.389855	0.376663	0.560123	0.425846	0.3826	0.375848	0.370007	0.533415	0.385872	0.386375	0.452868	0.391014	0.490361	0.34268	0.388665	0.390042	0.376317	0.426112	0.506567	0.595979	0.390385	0.617186	0.627894	0.663374	0.629246	0.461438
1849	2	2	28.06	0.551615	0.364041	0.305904	0.358246	0.368841	0.346963	0.372648	0.373188	0.657299	0.520685	0.380481	0.354922	0.350261	0.630301	0.570962	0.504566	0.369204	0.362341	0.347098	0.345291	0.365198	0.514133	0.341313	0.3702	0.317199	0.35111	0.364003	0.471367	0.493945	0.352763	0.37931	0.383714	0.362779	0.579786	0.582715	0.624754	0.577836
2991	2	2	31.44	0.509819	0.296136	0.349606	0.298558	0.334552	0.425406	0.460551	0.290146	0.344611	0.318648	0.291849	0.402664	0.292841	0.350961	0.337366	0.275681	0.33135	0.287133	0.407333	0.229148	0.284235	0.300162	0.303485	0.378812	0.284868	0.267933	0.288844	0.278724	0.285078	0.303098	0.308105	0.276597	0.302697	0.383091	0.313813	0.324384	0.351009
3009	2	2	31.12	0.446995	0.248028	0.298861	0.4581	0.29533	0.268954	0.285488	0.274419	0.309648	0.266863	0.410543	0.421433	0.241237	0.319194	0.458031	0.243369	0.295252	0.329376	0.28064	0.276079	0.344224	0.441632	0.284077	0.289408	0.304459	0.393925	0.296931	0.301675	0.283871	0.319796	0.354487	0.308371	0.318308	0.322772	0.385656	0.440236	0.366445
3027	2	2	35.01	0.446016	0.372631	0.411376	0.684726	0.337848	0.418591	0.419922	0.442564	0.426424	0.41598	0.425494	0.572888	0.399859	0.447431	0.630136	0.487261	0.304798	0.40213	0.388782	0.350262	0.401384	0.346532	0.366067	0.571653	0.592075	0.437684	0.383525	0.390733	0.377398	0.398458	0.420955	0.615919	0.339061	0.375725	0.535334	0.413783	0.637802
#Genotype: 2 = HOM
*Ghrelin Treatment: 1 = Vehicle; 2 = Ghrelin

[truncated: 4 more sheets: Fig 6 Suppl 1G, Fig 6 Suppl 1H, Fig 6 Suppl 1I, Fig 6 Suppl 1J]
